## Replicative Instability Drives Cancer Progression

Benjamin B. Morris<sup>1, 2, †</sup>, Jason P. Smith<sup>1, 3</sup>, Qi Zhang<sup>4</sup>, Zhijie Jiang<sup>4</sup>, Oliver A. Hampton<sup>4</sup>, Michelle L. Churchman<sup>4</sup>, Susanne M. Arnold<sup>5</sup>, Dwight H. Owen<sup>6</sup>, Jhanelle E. Gray<sup>7</sup>, Patrick M. Dillon<sup>8</sup>, Hatem H. Soliman<sup>9</sup>, Daniel G. Stover<sup>6</sup>, Howard Colman<sup>10</sup>, Arnab Chakravarti<sup>11</sup>, Kenneth H. Shain<sup>12</sup>, Ariosto S. Silva<sup>13</sup>, John L. Villano<sup>5</sup>, Michael A. Vogelbaum<sup>14</sup>, Virginia F. Borges<sup>15</sup>, Wallace L. Akerley<sup>16</sup>, Ryan D. Gentzler<sup>8</sup>, Richard D. Hall<sup>8</sup>, Cindy B. Matsen<sup>17</sup>, C. M. Ulrich<sup>18</sup>, Andrew R. Post<sup>19</sup>, David A. Nix<sup>20</sup>, Eric A. Singer<sup>21</sup>, James M. Larner<sup>22</sup>, P. Todd Stukenberg<sup>1</sup>, David R. Jones<sup>23</sup>, Marty W. Mayo<sup>1, \*</sup>

<sup>1</sup>Department of Biochemistry and Molecular Genetics, University of Virginia, Charlottesville, Virginia, USA

<sup>2</sup>Department of Pathology, University of Virginia, Charlottesville, Virginia, USA

<sup>3</sup>Center for Public Health Genomics, University of Virginia, Charlottesville, VA, USA

<sup>4</sup>M2Gen, Tampa, Florida, USA

<sup>5</sup>Division of Medical Oncology, Department of Internal Medicine, Markey Cancer Center, Lexington, Kentucky, USA

<sup>6</sup>Division of Medical Oncology, Department of Internal Medicine, The Ohio State University Comprehensive Cancer Center, Columbus, Ohio, USA

<sup>7</sup>Department of Thoracic Oncology, H. Lee Moffitt Cancer Center and Research Institute, Tampa, Florida, USA

<sup>8</sup>Division of Hematology/Oncology, Department of Internal Medicine, University of Virginia Comprehensive Cancer Center, Charlottesville, Virginia

<sup>9</sup>Department of Breast Oncology, H. Lee Moffitt Cancer Center and Research Institute, Tampa, Florida, USA

<sup>10</sup>Huntsman Cancer Institute and Department of Neurosurgery, University of Utah, Salt Lake City, Utah, USA

<sup>11</sup>Department of Radiation Oncology, The Ohio State University Comprehensive Cancer Center, Columbus, Ohio, USA

<sup>12</sup>Department of Malignant Hematology, H. Lee Moffitt Cancer Center and Research Institute, Tampa, Florida, USA

<sup>13</sup>Department of Cancer Physiology, H. Lee Moffitt Cancer Center and Research Institute, Tampa, Florida, USA

<sup>14</sup>Department of NeuroOncology, H. Lee Moffitt Cancer Center, Tampa, Florida, USA

49 <sup>15</sup>Division of Medical Oncology, University of Colorado Comprehensive Cancer Center, Aurora,  
50 Colorado, USA

51  
52 <sup>16</sup>Department of Medical Oncology, Department of Internal Medicine, Huntsman Cancer  
53 Institute, Salt Lake City, Utah, USA

54  
55 <sup>17</sup>Department of Surgery, Huntsman Cancer Institute, University of Utah, Salt Lake City, Utah,  
56 USA

57  
58 <sup>18</sup>Huntsman Cancer Institute and Department of Population Health Sciences, University of  
59 Utah, Salt Lake City, Utah, USA

60  
61 <sup>19</sup>Department of Biomedical Informatics and Huntsman Cancer Institute, University of Utah,  
62 Salt Lake City, Utah, USA

63  
64 <sup>20</sup>Department of Oncological Sciences, Huntsman Cancer Institute, Salt Lake City, Utah, USA

65  
66 <sup>21</sup>Section of Urologic Oncology, Rutgers Cancer Institute of New Jersey, New Brunswick, New  
67 Jersey, USA

68  
69 <sup>22</sup>Department of Radiation Oncology, University of Virginia Comprehensive Cancer Center,  
70 Charlottesville, Virginia, USA

71  
72 <sup>23</sup>Department of Thoracic Surgery, Memorial Sloan-Kettering Cancer Center, New York, New  
73 York, USA

74  
75 †Morris is the first and major contributing author

76  
77 \*Correspondence: Marty W. Mayo, [mwm3y@virginia.edu](mailto:mwm3y@virginia.edu)

78  
79  
80 **Keywords:** Replicative instability (RIN), cancer progression, metastasis, MYBL2, single-strand  
81 break repair, translesion synthesis

82  
83  
84 **Conflicts of Interest Disclosure**

85  
86 JPS, QZ, ZJ, OAH, MLC, AS, SMA, WLA, MAV, PTS, ARP, HC, VFB, JML, AC, JLV, EAS,  
87 PMD, CBM, CMU, and DAN have no conflicts of interest relevant to this study to disclose.  
88 BBM and MWM hold provisional patent Serial No. 63/252,007. KHS has consultancy, advisor,  
89 and/or speaker roles with Adaptive Biotech, Janssen, Bristol-Myers Squibb, Takeda, Sanofi,  
90 Glaxo Smith Kline, and Amgen. He has research funding with Karyopharm and Abbvie, and  
91 funds from BMS and Janssen for clinical trials. DHO is supported in part by research funding  
92 from BMS, Merck, Genetech, Pfizer, Onc.AI, and Palobiofarma provided to OSUCC. DGS  
93 servers on the Novartis advisory board. HHS has consultancy roles with Novartis,  
94 AstraZeneca, Eisai, PUMA, Seattle Genetics, and Sanofi. He also is supported in part by  
95 research funding to Moffitt Cancer Center provided by Amgen. DRJ has a consultancy and  
96 advisory roles at AstraZeneca as well as a clinical trial steering committee role at Merck. RDG

97 has consultancy, advisor, and/or speaker roles with Daiichi Sankyo, AstraZeneca, BluePrint  
98 Medicines, Pfizer, Mirati, Sanofi, Oncocyte, Jazz Pharmaceuticals, Rockpoint CME, Targeted  
99 Oncology, Total Health Conferencing, and OncLive. He is supported in part by research  
100 funding provided to UVA Comprehensive Cancer Center by Pfizer, Mirati, Daiichi Sankyo,  
101 Jounce Therapeutics, Helsinn, BMS, Merck, Janssen, and RTI International. DGS has advisory  
102 roles for Novartis. JEG has consultancy or advisory roles with AbbVie, AstraZeneca, Axiom HC  
103 Strategies, Blueprint Medicines, BMS, Celgene Copr, Daiichi Sankyo, EMD Serono,  
104 Genentech, Inivata, Janssen, Jazz Pharmaceuticals, Loxo Oncology, Merck, Norvartis, Sanofi,  
105 Takeda, OncoCyte, and Triptych Health Partners. She is supported in part by research funding  
106 provided by AstraZeneca, Boehringer Ingelheim, BMS, Genentech, G1 Therapeutics, Ludwig  
107 Institute of Cancer Research, Merck, Norvartis, and Pfizer. RGH has consultancy or advisory  
108 roles with BMS and Ono Pharmaceutical. He is supported in part by research funding to  
109 UVACC provided by Merck, AstraZeneca/MedImmune, Mirati Therapeutics, Lilly, and Daiichi  
110 Sankyo.

111

112

### 113 **Abstract**

114

115 In the past decade, defective DNA repair has been increasingly linked with cancer progression.  
116 Human tumors with markers of defective DNA repair and increased replication stress have  
117 been shown to exhibit genomic instability and poor survival rates across tumor types. Here we  
118 utilize -omics data from two independent consortia to identify the genetic underpinnings of  
119 replication stress, therapy resistance, and primary carcinoma to brain metastasis in BRCA  
120 wildtype tumors. In doing so, we have defined a new pan-cancer class of tumors characterized  
121 by replicative instability (RIN). RIN is defined by genomic evolution secondary to replicative  
122 challenge. Our data supports a model whereby defective single-strand break repair,  
123 translesion synthesis, and non-homologous end joining effectors drive RIN. Collectively, we  
124 find that RIN accelerates cancer progression by driving copy number alterations and  
125 transcriptional program rewiring that promote tumor evolution.

126

127

### 128 **Statement of Significance**

129

130 Defining the genetic basis of genomic instability with wildtype BRCA repair effectors is a  
131 significant unmet need in cancer research. Here we identify and characterize a pan-cancer  
132 cohort of tumors driven by replicative instability (RIN). We find that RIN drives therapy  
133 resistance and distant metastases across multiple tumor types.

134

135

136

137

138

139

140

141

142

143

144

145 **Introduction**

146

147

148

149

150

151

152

153

154

155

156

157

158

159

160

161

162

163

164

165

166

167

168

169

170

171

172

173

174

175

176

177

178

179

180

181

182

183

184

185

186

187

188

189

190

191

192

Large scale sequencing efforts have enabled the discovery of genetic events that drive cancer development (1-5). Analysis of sequencing data has helped establish molecular classifiers through which tumors can be grouped according to mutations, copy number changes, or fusions. Careful study of genetic drivers has greatly expanded our understanding of how cancers develop. Despite this knowledge, primary tumors with similar genetic backgrounds often have highly heterogeneous outcomes, suggesting that there are additional factors that influence patient outcomes beyond initial oncogenic events. This is especially true when considering key cancer progression events such as therapy resistance and metastasis.

Decades of research has revealed processes dysregulated by cancers, summarized as hallmarks of cancer (6-7). Of these hallmarks, genomic instability has been linked to progressive disease across tumor types (8). Familial genetic studies and cancer genome analyses have revealed that genomic instability can develop following inactivation of DNA repair genes, such as BRCA1, BRCA2, and BRCA-related genes (9). As a result, tumors rely on error-prone DNA repair pathways and accumulate mutations and chromosomal alterations (9). Clinically, tumors with defective BRCA genes can be targeted using PARP inhibitors and platinum chemotherapies (10). However, it is recognized that genomic instability is observed in tumors that lack BRCA inactivation (11). Importantly, these tumors respond poorly to PARP inhibition, chemotherapy, and irradiation (11). Defining the genetic underpinnings of tumors with genomic instability and wildtype repair effectors is a significant unmet need in cancer research.

Previous work from our group revealed that elevated expression of the transcription factor MYB proto-oncogene like 2 (*MYBL2*) identified lung adenocarcinomas with genomic instability and wildtype BRCA (12). Our initial studies revealed that this *MYBL2* High phenotype was associated with a unique set of cancer genetics and identified patients at risk for poor outcomes. In this manuscript, we sought to identify a pan-cancer mechanism that underpins genomic instability and cancer progression in tumors with wildtype BRCA. In this study, we provide evidence that elevated *MYBL2* expression is a robust marker of poor patient outcomes across tumor types and genotypes. Importantly, this *MYBL2* High cohort is defined by genomic instability and inefficient homologous recombination despite containing wildtype BRCA. Analysis of the DNA repair landscape revealed that the underlying genetic basis of *MYBL2* High disease are heterozygous losses of single-strand break repair, translesion synthesis, and/or non-homologous end-joining effectors. These genetic lesions cause *MYBL2* High tumors to experience significant replication stress. Functional clustering of replication stress sensitive sites revealed that elevated replication stress promotes copy number alterations that rewire transcriptional programs and impact hallmarks of cancer master regulators. Clinically, this phenotype identifies patients at risk for poor outcomes when treated with chemotherapy and irradiation. Furthermore, our results demonstrate that *MYBL2* expression stratifies patient risk for distant metastases, especially to the brain. Our data defines a new pan-cancer class of tumors driven by replicative instability (RIN), unifying seemingly disparate cancers. Moreover, these results define a new mechanism through which RIN accelerates cancer progression by impacting several hallmarks of cancer.

## 193 **Results**

194

### 195 **Pan-cancer analysis identifies *MYBL2* expression as a robust marker of poor patient** 196 **outcomes across tumor types and genotypes**

197

198 To test if *MYBL2* expression identified patients with poor outcomes and progressive  
199 disease across tumor types, we analyzed 32 studies curated by The Cancer Genome Atlas  
200 (TCGA) and other groups (13). For each study, samples were stratified based on *MYBL2*  
201 mRNA expression using a quartile approach (**Figure 1A**). To be included in further analyses,  
202 *MYBL2* expression had to identify patients with significantly inferior overall survival (OS) and  
203 progression free survival (PFS) outcomes. Kaplan-Meier analyses confirmed that *MYBL2*  
204 expression was a robust marker of poor patient outcomes in multiple tumor types, including  
205 lung adenocarcinoma (LUAD), isocitrate dehydrogenase (IDH)-mutant lower grade glioma  
206 (IDH<sup>MUT</sup> LGG), pancreatic adenocarcinoma (PAAD), uterine corpus endometrial carcinoma  
207 (UCEC), and sarcoma (SARC) (**Figure 1B, Supplementary Table 1**). Across these tumor  
208 types, patients with *MYBL2* High disease had significantly worse OS, disease-specific survival  
209 (DSS), and PFS outcomes compared to patients with *MYBL2* Low tumors.

210 Next, *MYBL2* High and Low tumors were profiled for tumor specific genetic driver  
211 events as defined previously (**Figure 1C**) (1-5). Surprisingly, this analysis demonstrated that  
212 *MYBL2* High tumors develop across common cancer genotypes, with few statistically  
213 significant enrichments for individual driver alterations. Notable exceptions include enrichments  
214 for TP53 and SMARCA4 mutations in LUAD and TP53 mutations in UCEC. *MYBL2* High  
215 UCEC was also inversely correlated with PTEN and CTNNB1 mutations. Given the lack of  
216 enrichment, driver genes were binned into broad tumor suppressor and oncogene categories  
217 to test for general enrichment patterns (**Figure 1D**). This analysis also failed to identify a clear  
218 pattern, indicating that there are additional steps beyond known driver mutations that are  
219 required to generate *MYBL2* High tumors.

220

### 221 ***MYBL2* High tumors are characterized by genomic instability and inefficient** 222 **homologous recombination despite containing wildtype BRCA**

223

224 To characterize similarities of *MYBL2* High disease, we analyzed DNA damage metrics  
225 provided by the TCGA PanCancer working group (13, 14). Using these data, we found *MYBL2*  
226 High tumors universally had significantly elevated mutation burden as well as greater fractions  
227 of the genome altered (FGA) (**Figure 2A**). All *MYBL2* High tumor cohorts exhibited significantly  
228 greater levels of microsatellite instability (MSI) (**Figure 2B**). It should be noted that only a small  
229 number of samples across tumor types reach the threshold required to be deemed 'MSI-High'  
230 (MSISensor score  $\geq 10$ ), most of which are UCECs (15). Regardless, separating tumors based  
231 on *MYBL2* mRNA expression consistently identified tumors with varying degrees of elevated  
232 MSI. Taken together, these data demonstrate that genomic instability is a hallmark of *MYBL2*  
233 High disease.

234 Studies have shown that a common cause of genomic instability is a loss of  
235 homologous recombination (HR) repair (9). To analyze the status of HR repair, we analyzed  
236 combined homologous recombination deficiency (combined HRD) scores and repair  
237 proficiency scores (RPS) (14, 16). Combined HRD scores are derived from the presence of  
238 genomic scars as they reflect the sum of chromosomal alterations impacting telomeric regions,  
239 loss of heterozygosity events, and large-scale transitions (14). Tumors with high combined

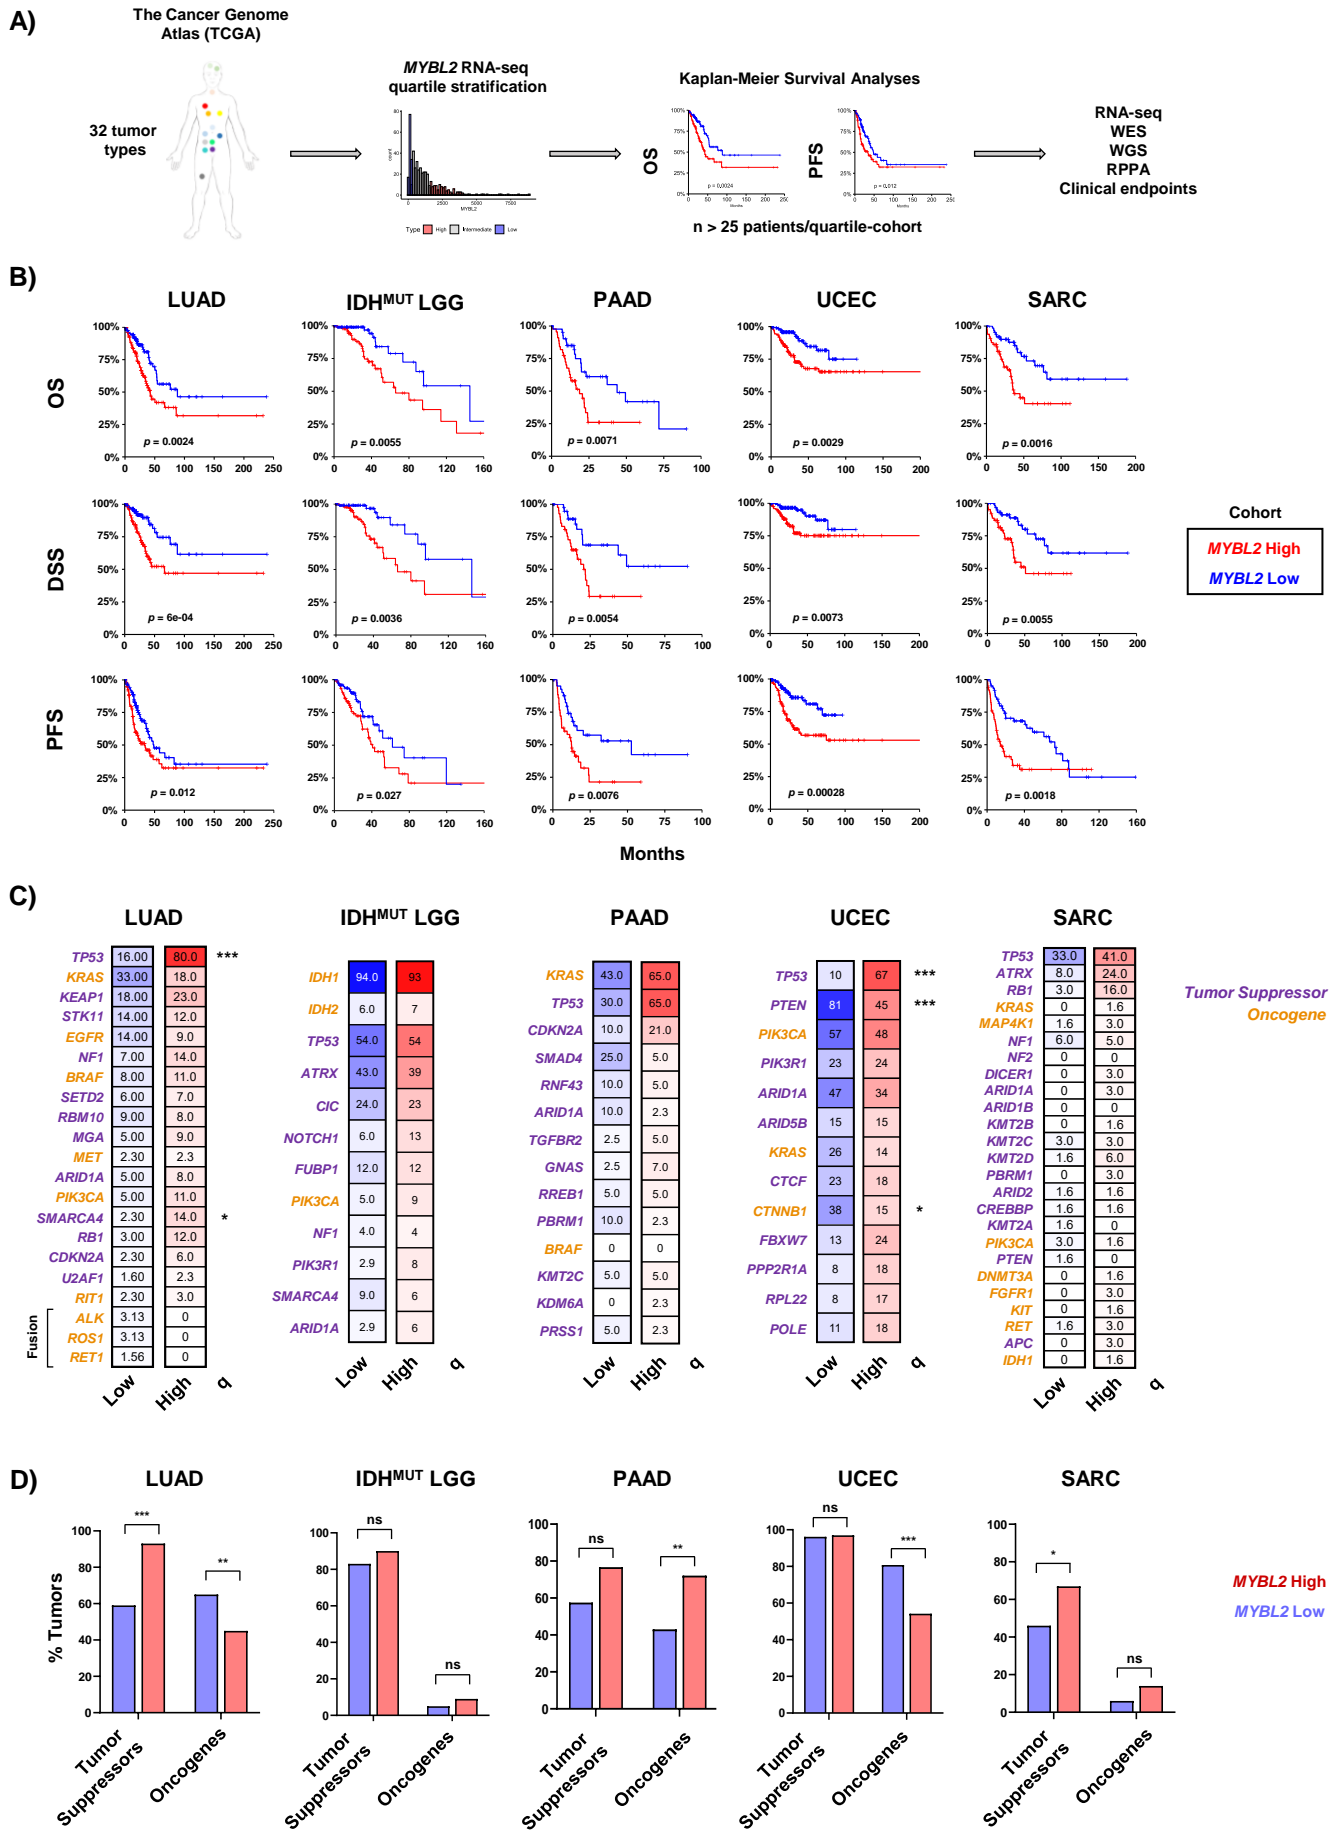

240 **Figure 1: Elevated *MYBL2* mRNA expression identifies patients with poor outcomes**  
241 **across multiple tumor types and genotypes. A)** Pan-cancer analysis overview. **B)** Kaplan-  
242 Meier analyses demonstrate that *MYBL2* expression is robustly prognostic across multiple  
243 tumor types for OS, DSS, and PFS outcomes. Log-rank test *p*-values are displayed. **C)** *MYBL2*  
244 High tumors develop across common cancer genetic driver backgrounds. Percentages reflect  
245 the percent of tumors with gene specific alterations. Statistical significance mapping represents  
246 Benjamini-Hochberg corrected *q* values, *q* < 0.05 \*, *q* < 0.01 \*\*, *q* < 0.001 \*\*\*. **D)** Individual  
247 tumors show different patterns of tumor suppressor inactivation and oncogene activation with  
248 respect to *MYBL2* High and *MYBL2* Low disease. IDH<sup>MUT</sup> LGG tumor suppressor and  
249 oncogene status were mapped excluding founding IDH mutations. One-sided Fisher's exact  
250 test, *p* < 0.05 \*, *p* < 0.01 \*\*, *p* < 0.001 \*\*\*. LUAD: lung adenocarcinoma. IDH<sup>MUT</sup> LGG: IDH-  
251 mutant lower grade glioma. PAAD: pancreatic adenocarcinoma. UCEC: uterine corpus  
252 endometrial carcinoma. SARC: sarcoma.

253 HRD scores exhibit elevated genomic instability. The repair proficiency score is an RNA-based  
254 metric that captures the expression of key double-strand break repair effectors (16).  
255 Low RPS values indicate tumors with dysfunctional HR repair (16). *MYBL2* High tumors,  
256 regardless of tumor type, exhibited significantly elevated combined HRD scores and  
257 significantly decreased RPS scores, compared to *MYBL2* Low tumors (**Figure 2C**). Taken  
258 together, two orthogonal metrics indicate that *MYBL2* High tumors have inefficient HR repair.

259 Inefficient HR repair has been linked to inactivating mutations or deep deletions in  
260 BRCA genes (9). Given this, we profiled *MYBL2* High and Low tumors for somatic mutations or  
261 homozygous deletions in BRCA genes (**Figure 2C**). Surprisingly, mutations and deletions were  
262 rare in *MYBL2* High tumors. More importantly, these loss of function alterations were not  
263 significantly enriched when comparing *MYBL2* High and Low cohorts (**Figure 2C**). One  
264 exception to these findings was an enrichment for CHEK2 alterations in *MYBL2* High UCEC.  
265 Careful inspection of the data shown in Figure 2C reveals increased inactivating alterations in  
266 our LUAD and UCEC cohorts. This is likely because LUAD is linked to carcinogen exposure  
267 and several *MYBL2* High UCEC tumors carry POLE mutations, which impair polymerase  
268 proofreading. These results indicate that *MYBL2* High tumors fall into the clinically relevant  
269 category of tumors with genomic instability and inefficient HR repair despite carrying wildtype  
270 BRCA.

### 271 272 **Heterozygous loss of repair effectors underly defective DNA repair in *MYBL2* High** 273 **tumors**

274  
275 Given the lack of BRCA gene inactivation, we characterized the DNA repair landscape  
276 in *MYBL2* High tumors in search of the genetic origin of genomic instability. To do this, we  
277 developed a weighted expression (WE) score to describe how expression of repair pathways is  
278 regulated in tumors (**Methods**). We applied this metric to all single-strand break repair  
279 pathways (SSBR), double-strand break repair pathways, and cell cycle checkpoint and lesion  
280 bypass mechanisms (**Figure 3A**). Analysis of WE pathway scores revealed a striking  
281 imbalance between expression patterns of different repair pathways. Key double-strand break  
282 repair pathways (HR, FA, MMEJ) and checkpoint signaling pathways were robustly  
283 upregulated across *MYBL2* High tumors while single-strand break pathways showed different  
284 degrees of downregulation (**Figure 3A**). Across tumor types, we found that translesion  
285 synthesis (TLS), nucleotide excision repair (NER), and non-homologous end-joining (NHEJ)  
286 pathways were consistently the most downregulated pathways. Correlation analysis  
287 demonstrated patterns observed in **Figure 3A** were strongly correlated across cancer types  
288 (**Figure 3B**). A notable tumor specific event was the strong downregulation of direct repair  
289 (DR) observed in *MYBL2* High IDH<sup>MUT</sup> LGG.

290 We next asked if strongly downregulated pathway scores were predominantly driven by  
291 decreased expression of individual effector genes. Close inspection revealed that *MYBL2* High  
292 tumors exhibited strong downregulation of individual effectors (**Supplementary Table 3**).  
293 Using whole exome sequencing and copy number data, we profiled *MYBL2* High tumors for  
294 genetic alterations that could account for this specific downregulation. Like our BRCA gene  
295 analysis (**Figure 2C**), homozygous deletions and inactivating mutations were highly infrequent  
296 in *MYBL2* High tumors and could not explain the expression differences observed in **Figure**  
297 **3A**. Additional analysis revealed that the driver of repair pathway dysregulation in *MYBL2* High  
298 tumors were specifically enriched heterozygous loss events impacting key repair effectors  
299 (**Figure 3C**). Importantly, these heterozygous loss events were highly correlated with  
300 decreased effector mRNA expression (**Figure 3C**). Looking across cancers, we found that



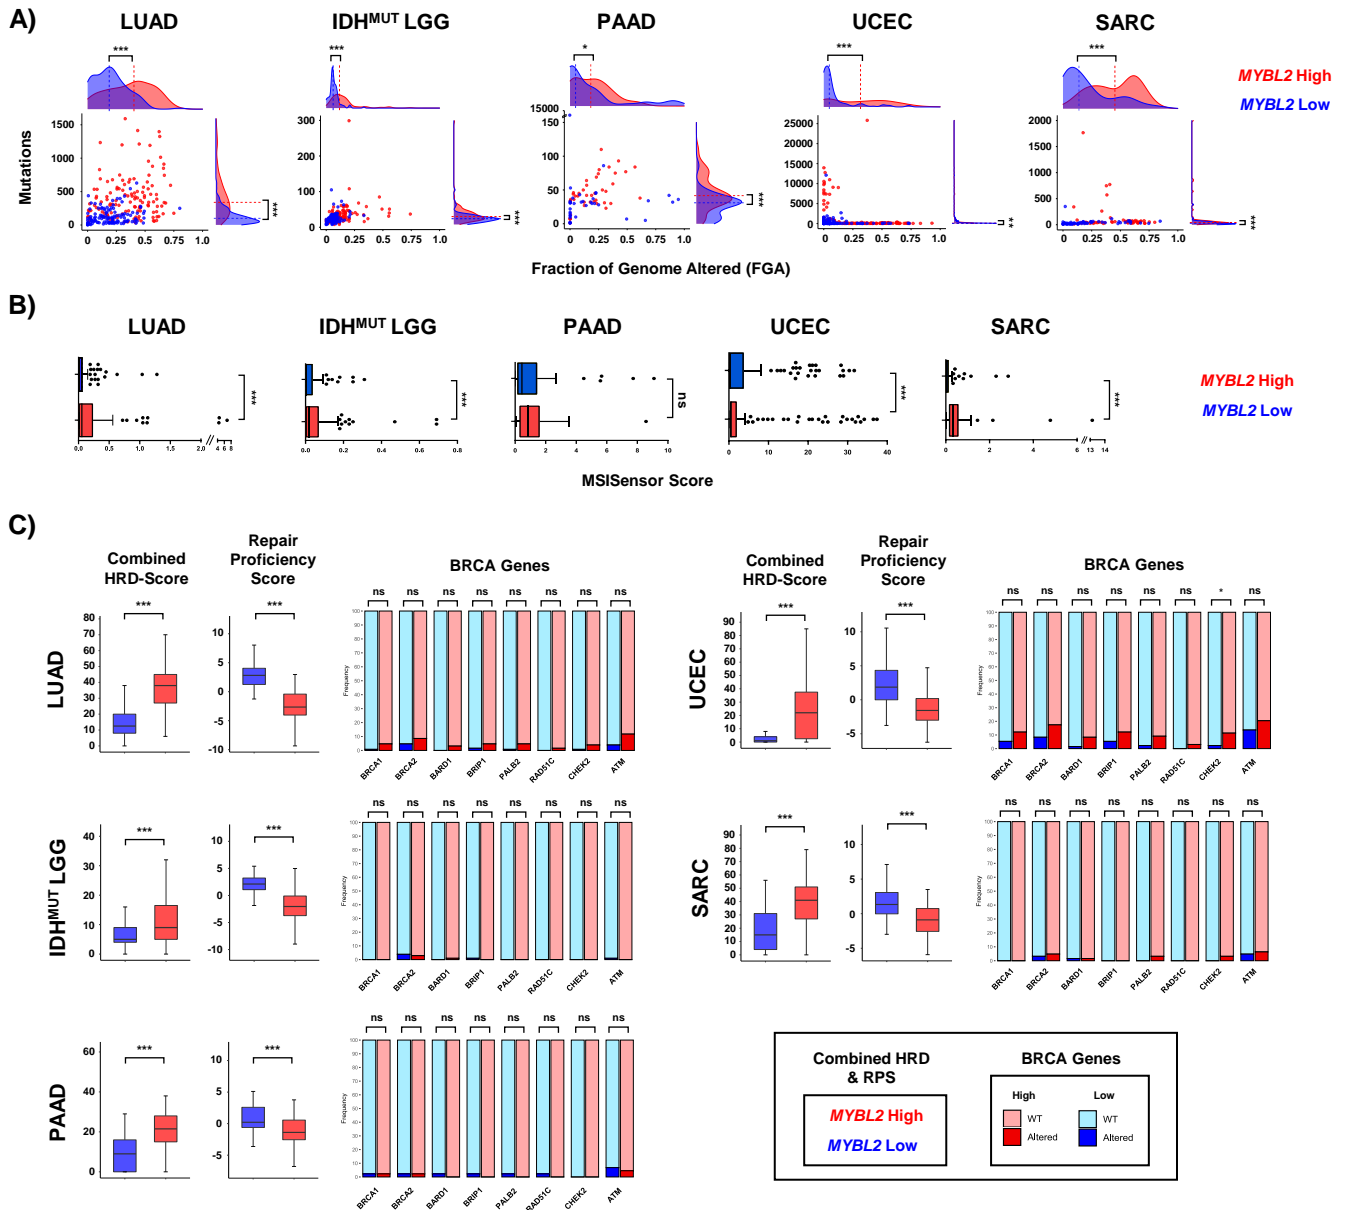

301 **Figure 2: *MYBL2* High tumors exhibit genomic instability despite containing wildtype**  
302 **BRCA genes. A) *MYBL2* High tumors have significantly greater somatic mutation and fraction**  
303 **of the genome (FGA) altered. B) *MYBL2* High tumors have elevated microsatellite instability**  
304 **scores. C) *MYBL2* High tumors exhibit inefficient homologous recombination despite**  
305 **containing wildtype BRCA genes. A), B), C) Statistical significance was assessed using**  
306 **Wilcoxon signed rank tests ().  $p < 0.05$  \*,  $p < 0.01$  \*\*,  $p < 0.001$  \*\*\*. C) Enrichments for**  
307 **inactivating alterations in BRCA genes were tested using one-sided Fisher's exact tests.**  
308 **Significance is mapped using Benjamini-Hochberg corrected  $q$  values.  $q < 0.05$  \*,  $q < 0.01$  \*\*,  $q$**   
309  **$< 0.001$  \*\*\*; ns, not significant.**

310 heterozygous loss events in XPC (2/5 tumor types), POLK (4/5), LIG4 (5/5), ATM (3/5), and  
311 TP53BP1 (3/5) were common in *MYBL2* High tumors. Heterozygous loss of MGMT was  
312 specific to *MYBL2* High IDH<sup>MUT</sup> LGG, fitting with previous reports of DR repair impairment  
313 being a tissue-specific driver of oncogenesis (17).

314 To assess the functional impact of these heterozygous loss events, we analyzed  
315 Catalog of Somatic Mutations in Cancer (COSMIC) v3.2 single-base substitution (SBS)  
316 signatures data (**Figure 3D**) (18). This analysis identified several SBS signatures that were  
317 enriched in *MYBL2* High tumors. For instance, SBS8 was over-represented in both *MYBL2*  
318 High IDH<sup>MUT</sup> LGG and PAAD. SBS8 is characterized by increased C>A transversions and has  
319 been linked to deficient NER (18). This fits well given that *MYBL2* High IDH<sup>MUT</sup> LGG have  
320 increased heterozygous losses in NER effectors CETN2 and GTF2H5 (**Figure 3C**). Also,  
321 *MYBL2* High PAAD have significantly increased heterozygous losses affecting both XPC and  
322 POLK. Here, XPC and POLK mediate the first (lesion recognition) and last (repair synthesis)  
323 steps of NER (19). SBS21 was over-represented in *MYBL2* High UCEC and SARC cohorts.  
324 SBS21 is defined by increased T>C transversions and has been previously linked with NER  
325 defects (18). Previously, we identified that *MYBL2* High UCEC carried heterozygous losses in  
326 ERCC5 and POLK. Similarly, *MYBL2* High SARC also have significantly increased  
327 heterozygous losses in POLK. Lastly, signature SBS4 was over-represented in *MYBL2* High  
328 LUAD. SBS4 features increased C>A transversions and is the byproduct of tobacco-smoke  
329 induced lesions (20). Importantly, *MYBL2* High LUAD carried heterozygous losses in XPC and  
330 POLK which impair cellular ability to repair smoking induced lesions through NER (12). This  
331 analysis supports the notion that heterozygous losses of repair effectors functionally decrease  
332 pathway efficiency.

333

### 334 **Defective SSBR and TLS are linked to increased replication stress and distinct genomic** 335 **footprints in *MYBL2* High tumors**

336

337 SSBR and TLS pathways are essential for safe-guarding DNA replication. Various  
338 SSBR pathways are responsible for regulating the speed and accuracy of the replicative  
339 polymerases. Additionally, TLS represents an essential lesion bypass mechanism that helps  
340 alleviate replication fork stalling and collapse when the replicative machinery encounters DNA  
341 lesions (21). Genetic models of defective SSBR and TLS demonstrate significant genomic  
342 instability and elevated replication stress (22). Cells contain multiple pathways that sense and  
343 respond to replication dysregulation (23). Elevated expression of genes in these pathways are  
344 indicative of cells that experience significant replication stress (24). To investigate if *MYBL2*  
345 High tumors with impaired SSBR and TLS experience elevated replication stress, we  
346 developed a novel metric called the replication stress score (RS score) (**Methods**). This metric  
347 captures all major pathways involved in sensing replication stress, protecting and processing  
348 stalled replication forks, and the rescue of DNA replication (24). When comparing *MYBL2* High  
349 and Low cohorts, we found that *MYBL2* High tumors universally exhibited significantly elevated  
350 RS scores (**Figure 4A**). This suggests that *MYBL2* High tumors struggle with DNA replication,  
351 likely stemming from decreased SSBR and TLS capacity (**Figure 3**).

352 Based on findings in Figure 4A, we next asked if *MYBL2* High tumors accumulate  
353 somatic mutations at different locations and frequencies across intragenic regions. To test this  
354 hypothesis, we developed a metric called the mutational position score (MPS) (**Methods**). This  
355 metric allows us to directly compare the spatial location of somatic mutations in individual  
356 genes across all tumors. Here, MPS values closer to 0 correspond to mutations near to

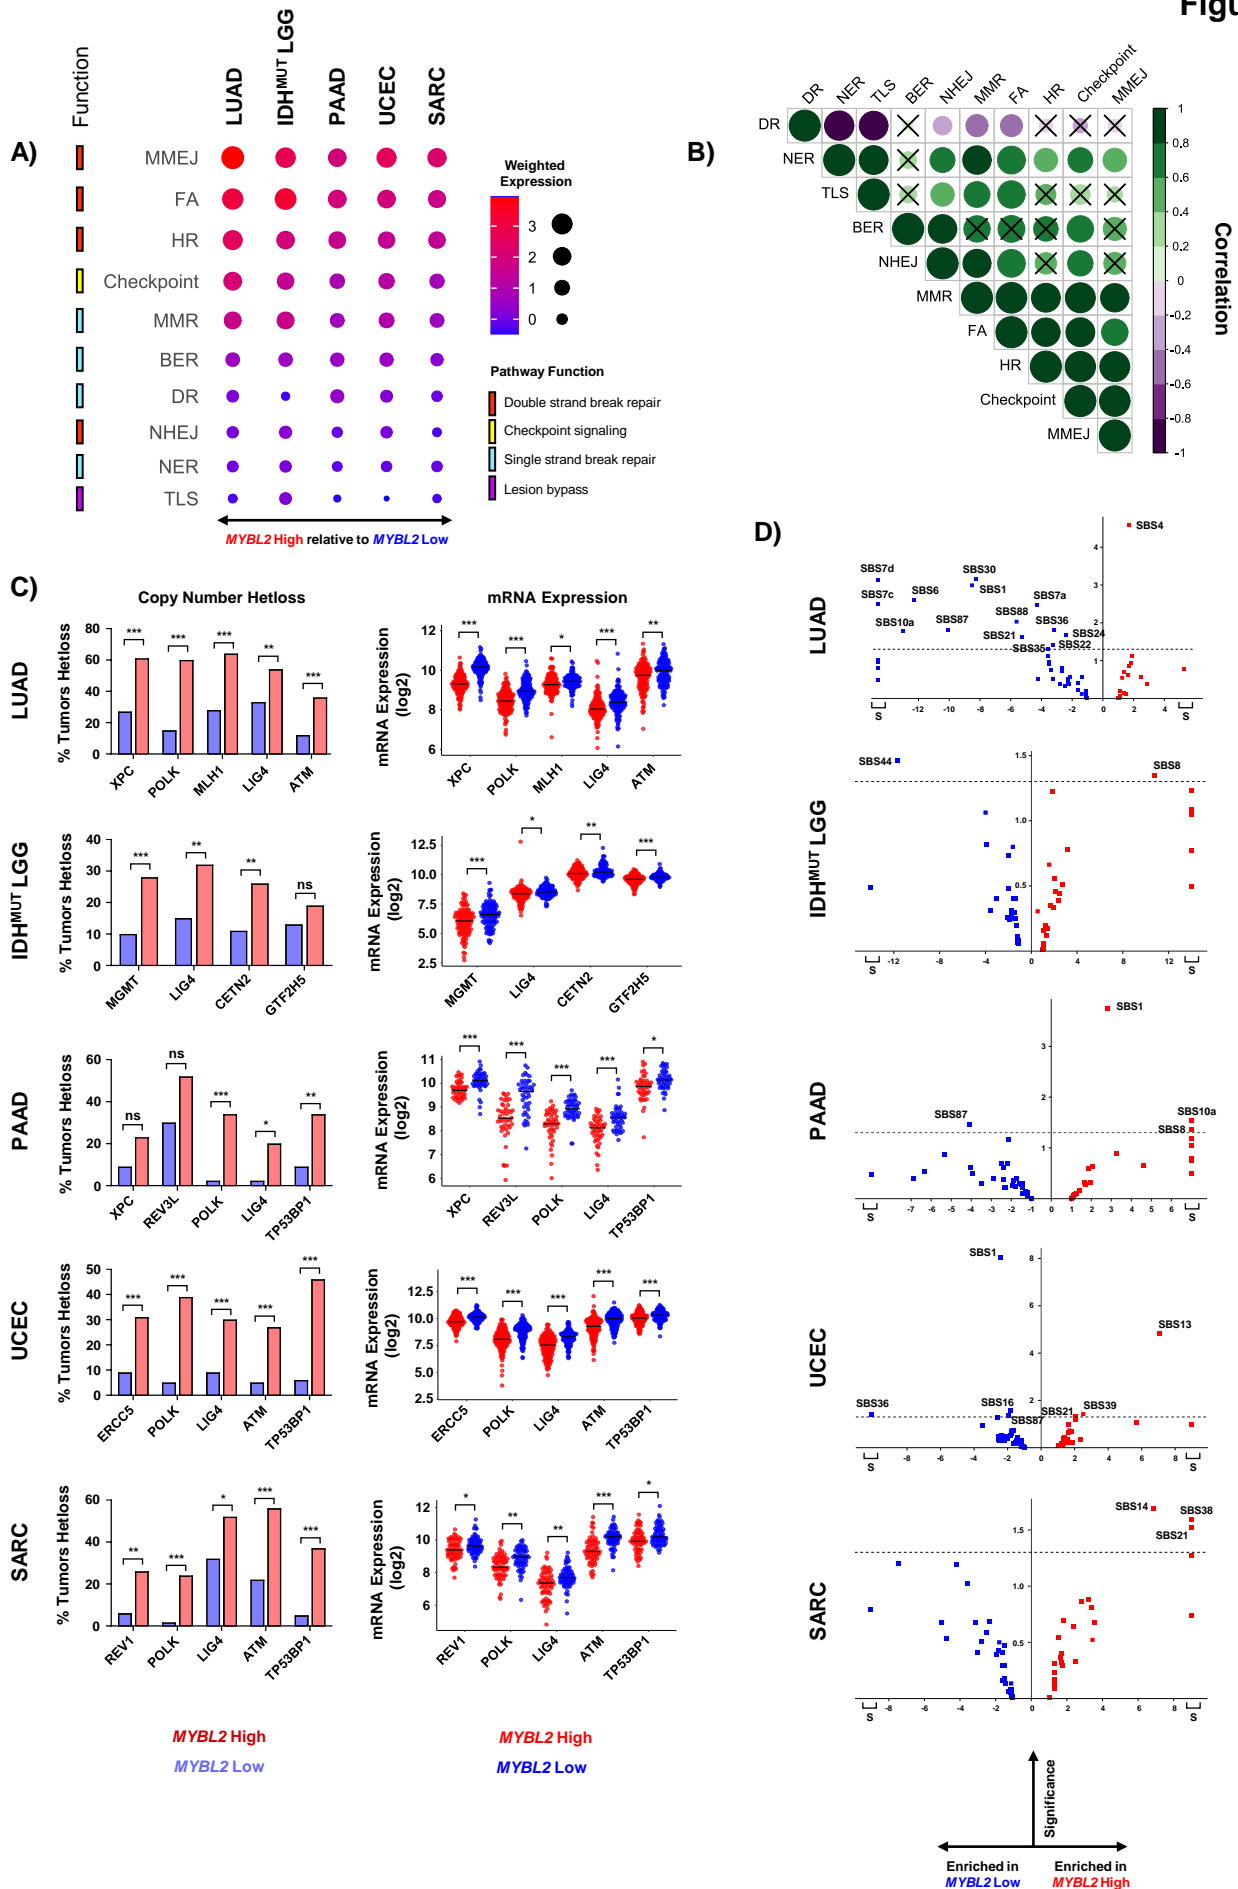

357 **Figure 3: Heterozygous losses impacting key DNA repair effectors are enriched in**  
358 ***MYBL2* High tumors. A)** Weighted expression scores reveal an imbalance in DNA repair  
359 pathway regulation. **B)** Observed differences in WE scores are highly correlated across  
360 different cancer types. Correlations with x marks indicate correlations that are not statistically  
361 significant (Pearson). **C)** Heterozygous losses in genes encoding key single-strand break  
362 repair, TLS, and NHEJ effectors are highly enriched in *MYBL2* High tumors. One-sided  
363 Fisher's exact test,  $p < 0.05$ , \*;  $p < 0.01$ , \*\*;  $p < 0.001$ , \*\*\*. Heterozygous loss events are  
364 highly correlated with decreased expression of repair effectors. Benjamini-Hochberg corrected  
365  $q$ .  $q < 0.05$ , \*;  $q < 0.01$ , \*\*,  $q < 0.001$ , \*\*\*. **D)** COSMIC v3.2 SBS analysis reveals heterozygous  
366 loss of repair effectors is associated with impaired pathway function. S: Signatures specifically  
367 observed only in *MYBL2* High or *MYBL2* Low tumors. Dotted line represents Student's T-test  $p$   
368 = 0.05.

369 the gene start, while values near 1 correspond to mutations close to the gene end. MPS values  
370 near 0.5 represent intragenic mutations accumulating in the middle of the gene body. When  
371 comparing MPS density traces, we found that *MYBL2* High tumors experience significant shifts  
372 in intragenic mutation location frequency (**Figure 4B**). For this analysis, we subdivided all  
373 genes based on gene length into long genes (> 3000 bp) and short genes (<3000 bp). For long  
374 genes, *MYBL2* High tumors tended to acquire more mutations near gene starts and gene  
375 ends, likely stemming from transcription-replication conflicts. *MYBL2* High PAAD tumors,  
376 however, interestingly showed increased accumulation of mutations near the middle of long  
377 genes. Analysis of short genes showed even more pronounced changes, where *MYBL2* High  
378 tumors showed increased mutation in the body of short genes (**Figure 4B**). The lack of  
379 significance for these patterns likely stems from fewer mutations in short genes, compared to  
380 long genes. Collectively, this shift in mutational position is consistent with increased replication  
381 stress and impaired SSBR and TLS pathways seen across *MYBL2* High tumors.

382 It has long been understood that thousands of genomic loci are sensitive to replication  
383 stress (25). Recent studies have subdivided these loci into two categories, early replicating  
384 fragile sites (ERFS) and mitotic DNA synthesis sites (MiDAS) (26-27). Genes encoded at these  
385 sites are sensitive to replication stress due to their local DNA sequence, replication timing, and  
386 location in the genome. ERFS genes have been shown to be highly AT rich, highly transcribed,  
387 and replicated in early S phase (26). As a result, the replicative polymerase frequently slips or  
388 encounters an RNA-polymerase, causing stalling or DNA breaks. These events have been  
389 shown to cause early replicating sites to be gained or amplified at increased rates. MiDAS  
390 genes, on the other hand, contain highly GC rich sequences, are replicated in late G2/M, and  
391 are located in replication origin poor regions (27). These circumstances make MiDAS genes  
392 difficult to replicate and cells frequently commit to mitosis prior to completing replication at  
393 these sites. Late replicating genomic regions have been associated with increased deletions  
394 as cells use various methods to complete replication (28). Given this, we hypothesized that  
395 *MYBL2* High tumors acquire greater numbers of genomic alterations at replication stress  
396 sensitive (RSS) sites. Using copy number and WES data, we profiled *MYBL2* High and Low  
397 tumors for amplifications, gains, homozygous deletions, heterozygous losses, and mutations  
398 impacting ERFS and MiDAS sites (**Methods**). Across both ERFS and MiDAS loci, we found  
399 that *MYBL2* High tumors accumulate significantly greater numbers of genetic alterations  
400 (**Figure 4C**). Strikingly, we found that the number of gene-level gains and heterozygous losses  
401 dwarfed that observed for amplifications, homozygous deletions, or mutations. Additionally,  
402 copy number trends associated with replication timing did not correlate with our findings (28);  
403 *MYBL2* High tumors acquired similar numbers of gains and heterozygous losses across both  
404 ERFS and MiDAS loci, with a trend toward more heterozygous losses (**Figure 4C**). This data is  
405 consistent with previous findings where elevated MMEJ activity is coincident with increased  
406 loss of heterozygosity events (29). Across all tumor types, we observed strong right-handed  
407 tailing indicating that many genes are impacted by gains or heterozygous losses in greater  
408 than 30-40% of *MYBL2* High tumors (**Figure 4C**). Taken together, these data suggest that  
409 repeated gene-level gains and heterozygous losses at RSS genomic sites originate from  
410 increased replication stress.

411

412

413

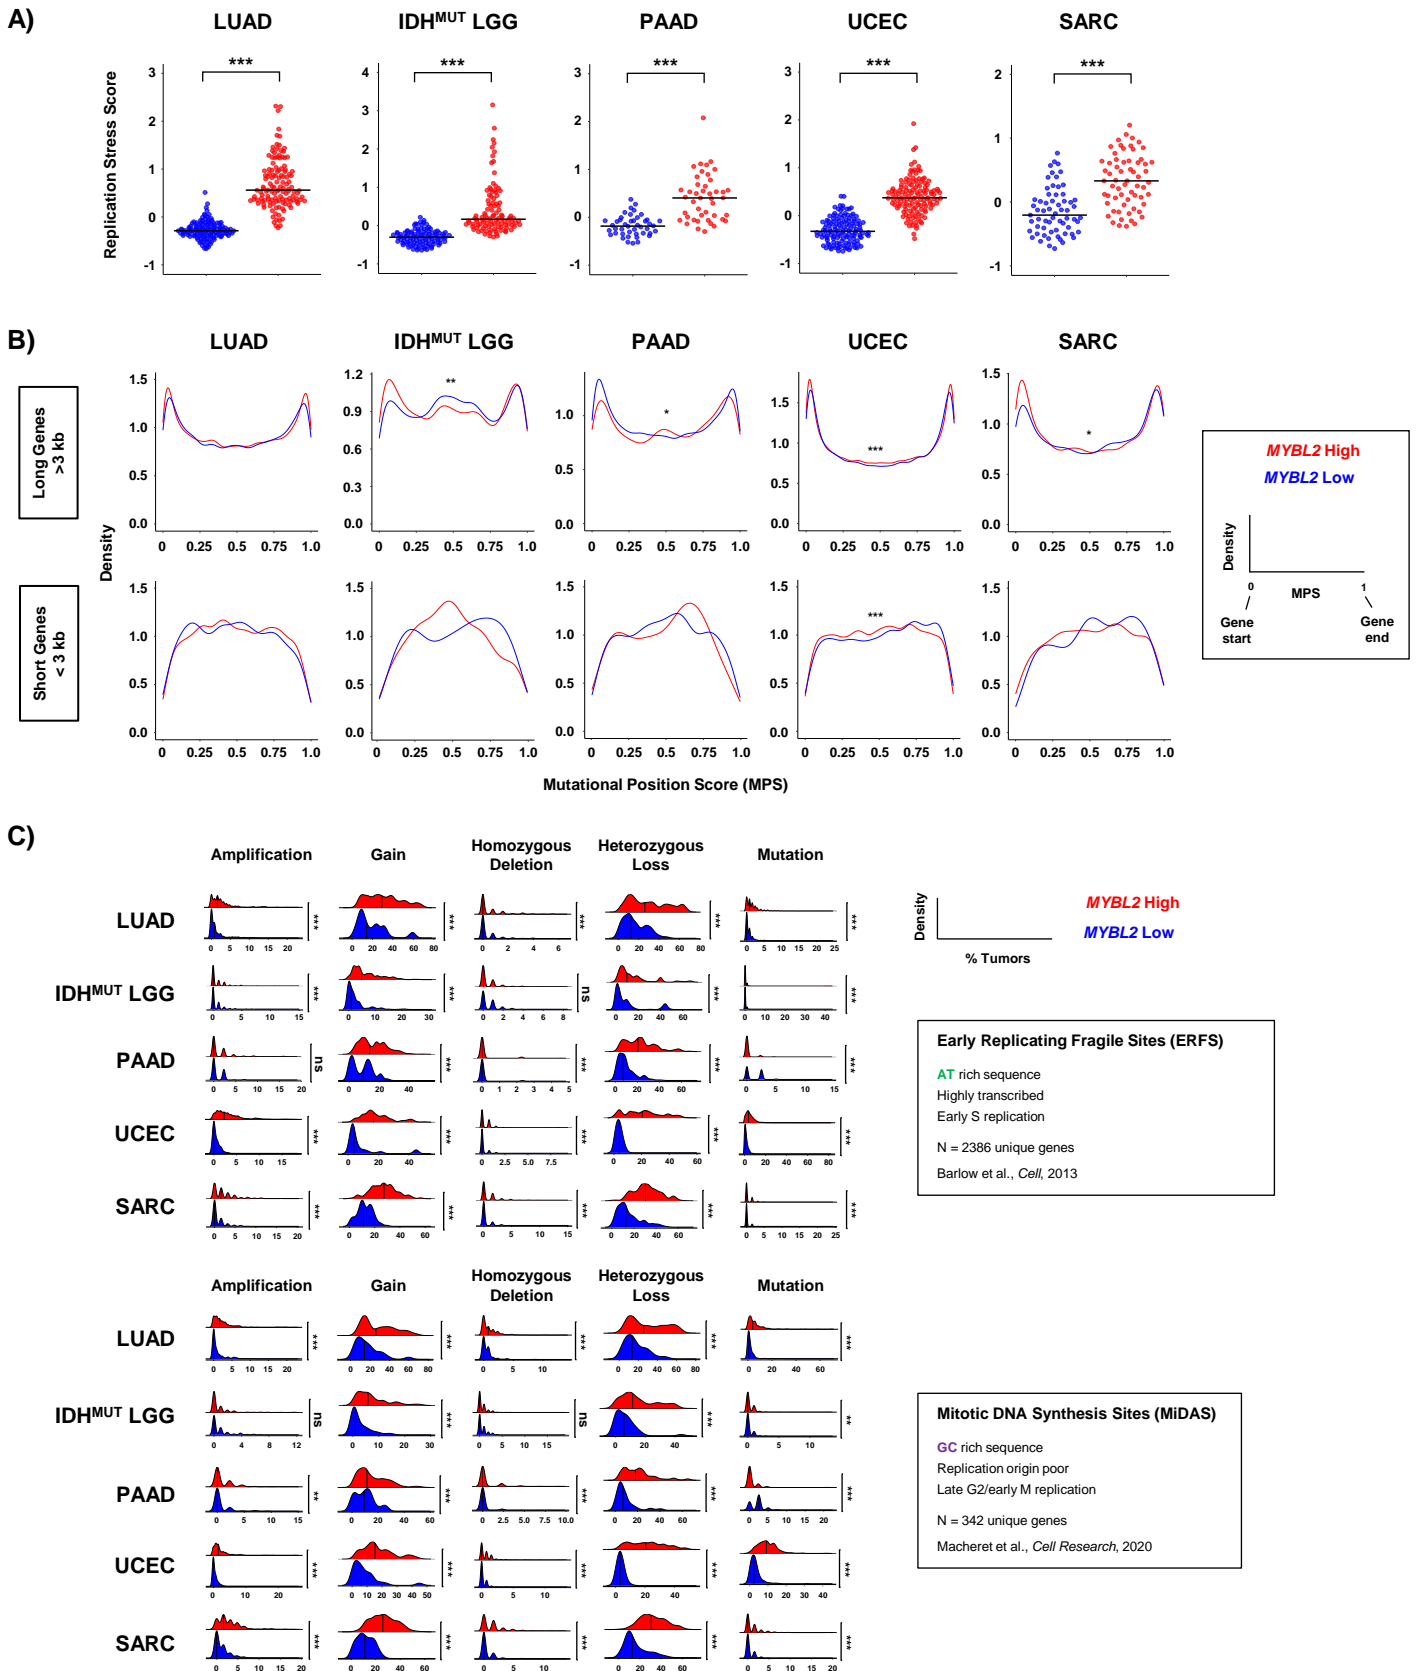

414 **Figure 4: *MYBL2* High tumors exhibit markers of chronic replication stress. A) *MYBL2***  
415 **High tumors universally demonstrate significantly elevated replication stress scores. Wilcoxon,**  
416  **$p < 0.05$ , \*;  $p < 0.01$ , \*\*;  $p < 0.001$ , \*\*\*. B) *MYBL2* High tumors experience a shift in intragenic**  
417 **somatic mutation position, relative to *MYBL2* Low tumors. Kolmogorov-Smirnov test,  $p < 0.05$ ,**  
418 **\*;  $p < 0.01$ , \*\*;  $p < 0.001$ , \*\*\*. C) *MYBL2* High tumors acquire significantly greater numbers of**  
419 **alterations at replication stress sensitive genomic sites. Wilcoxon,  $p < 0.05$ , \*;  $p < 0.01$ , \*\*;  $p <$**   
420 **0.001, \*\*\*.**



## 421 **Recurrent copy number alterations at RSS sites rewire transcriptional programs and** 422 **impact hallmark of cancer master regulators**

423  
424 After noticing that large numbers of genes were recurrently altered in *MYBL2* High  
425 tumors, we examined the function of genes encoded at RSS genomic sites (**Methods**).  
426 Biological process analysis revealed that genes encoded at RSS sites fit into thirteen  
427 functional categories (**Figure 5A**). Importantly, we found that conserved copy number changes  
428 significantly impacted gene expression (**Figure 5A-B**). Across cancers, we found that *MYBL2*  
429 High tumors frequently gained copies of genes controlling DNA replication and repair (cluster  
430 4). Similarly, we found recurrent heterozygous losses impacting multiple genes controlling cell  
431 death and survival (cluster 7). While some events were confined to individual tumor types,  
432 there was striking conservation of both the number and identity of genes altered across  
433 functional clusters in *MYBL2* High tumors (**Figure 5A, Supplementary Figures 1-5**). Further  
434 analysis revealed that copy number alteration and subsequent transcriptional regulation  
435 impacted master effectors responsible for regulating several hallmarks of cancer. Specifically,  
436 we observed repeated heterozygous loss and transcriptional downregulation of  
437 *TMEM173/STING1* (evading immune surveillance), *DAPK2* (evading cell death), *POLK* (DNA  
438 damage), *JAK2* (evading immune surveillance), *NF1* (growth factor signaling), *PDCD4* (protein  
439 translation), and *MGMT* (DNA damage) (**Figure 5B**). Recurrent copy number gains and  
440 transcriptional upregulation was observed for *BCL2L1* (evading cell death), *LIN9*  
441 (transcription), *ZEB1* (cell movement), *MYC* (transcription), *TK1* (limitless replicative potential),  
442 *LIN37* (transcription), and *ERBB2/HER2* (growth factor signaling) (**Figure 5B**). These results  
443 indicate that increased replication stress, stemming from heterozygous repair effector loss,  
444 promotes dysregulation of key master regulators which are encoded at RSS sites (**Figure 5C**).

## 445 ***MYBL2* High tumors exhibit increased neoantigen loads and immunosuppressive** 446 **microenvironments**

447  
448  
449 Given an increased dysregulation of key effectors controlling immune regulation, we  
450 sought to characterize the immune microenvironment associated with *MYBL2* High tumors. As  
451 expected, we found that *MYBL2* High tumors have significantly greater neoantigen loads  
452 compared to *MYBL2* Low (**Figure 6A**) (30). Next, we used ConsensusTME and TIDE  
453 algorithms to generate infiltration estimates for immune and stromal cell subtypes (31-32).  
454 Interestingly, we found that *MYBL2* High tumors across tumor types lacked statistically  
455 significant differences in CD8+ T-cell infiltration (**Figure 6B**). However, *MYBL2* High tumors  
456 universally were associated with elevated infiltration of myeloid-derived suppressor cell  
457 (MDSC) populations (**Figure 6B**). Across tumor types, we also found that *MYBL2* High tumors  
458 were associated with greater Exclusion scores and decreased Dysfunction scores (**Figure 6B**).  
459 One exception to this trend was *MYBL2* High PAAD, where both measures were trending but  
460 not statistically significant, likely due to smaller patient cohort sizes. Lastly, analysis of tumor  
461 hypoxia scores revealed *MYBL2* High tumors are significantly hypoxic (**Figure 6C**,  
462 **Supplementary Figure 11**) (13). Increased hypoxia scores fit well with increased MDSC  
463 infiltration estimates and significantly decreased infiltration of endothelial cells across *MYBL2*  
464 High tumors (**Supplementary Figures 6-10**). Hypoxia scores for TCGA SARC tumor samples  
465

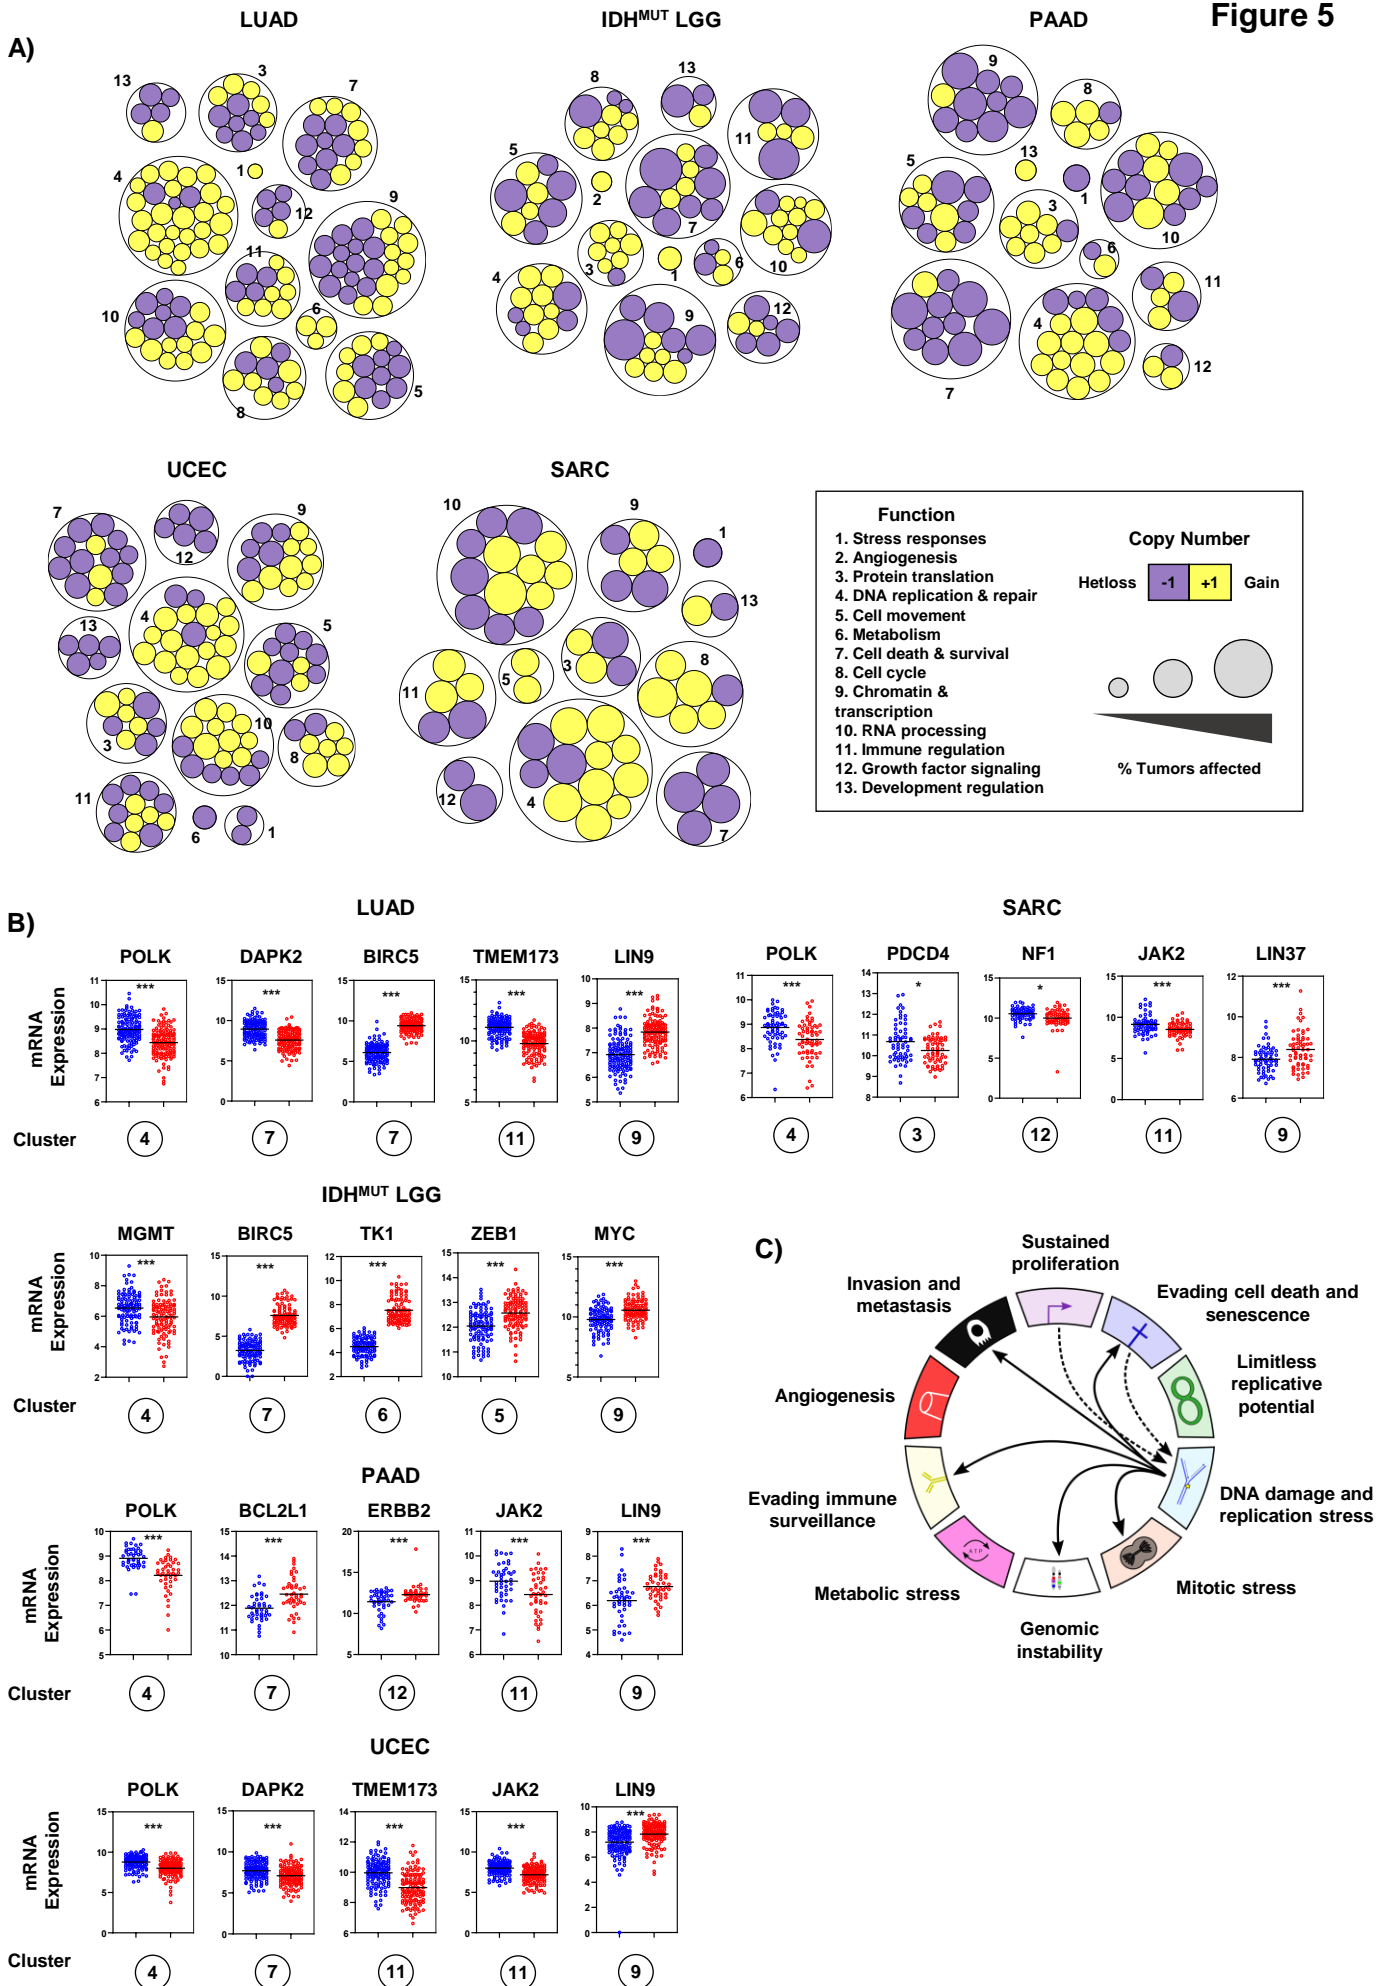

466 **Figure 5: Recurrent copy number alterations at replication stress sensitive sites rewire**  
467 **transcriptional programs and dysregulate master effectors controlling several hallmarks**  
468 **of cancer. A)** *MYBL2* High tumors acquire copy number alterations in essential enzymes  
469 encoded at replication stress sensitive sites. **B)** Enriched copy number alterations observed in  
470 *MYBL2* High tumors rewire transcriptional programs and dysregulate master effectors  
471 controlling several hallmarks of cancer. Statistical significance is mapped according to  
472 Benjamini-Hochberg corrected  $q$  values.  $q < 0.05$ , \*;  $q < 0.01$ , \*\*;  $q < 0.001$ , \*\*\*. Circled cluster  
473 numbers map to those displayed in **A)**. **C)** Replication stress dysregulates master effectors  
474 controlling several hallmarks of cancer.

475 were not available and are not included in the analysis in **Figure 6C**. All together, these data  
476 indicate that despite harboring increased neoantigen loads, *MYBL2* High tumors exhibit  
477 uniquely dysregulated, immunosuppressive microenvironments.

478

### 479 **Elevated *MYBL2* expression identifies patients at increased risk for therapy failure and** 480 **distant metastases**

481

482 Next, we sought to investigate the association of this *MYBL2* High phenotype with  
483 therapy response. To test if elevated *MYBL2* expression identified patients with poor  
484 responses to therapy, we analyzed 25 tumor types provided by the Oncology Research  
485 Information Exchange Network (ORIEN). Kaplan-Meier analysis demonstrated that patients  
486 with *MYBL2* High tumors had significantly poorer overall survival outcomes when treated with  
487 chemotherapeutics or irradiation across LUAD, IDH<sup>MUT</sup> LGG, invasive ductal breast cancer (ID-  
488 BRE), and late-relapse multiple myeloma (LRMM) cohorts (**Figure 7A**). These results fit well  
489 with our TCGA analyses where we linked elevated *MYBL2* expression with poor outcomes in  
490 treatment naïve LUAD and IDH<sup>MUT</sup> LGG (**Figure 1**). For ID-BRE, elevated *MYBL2* expression  
491 was not prognostic in our TCGA analysis, despite showing a similar biology to that of other  
492 *MYBL2* High cohorts described throughout this study (**Supplementary Table 1**). However,  
493 elevated *MYBL2* expression was highly predictive when patients were treated with  
494 chemotherapeutic or irradiation regimens. This analysis also extended our results into liquid  
495 tumors with *MYBL2* expression being robustly prognostic in the most recalcitrant form of  
496 multiple myeloma, LRMM (>4 lines of prior therapy). Importantly, analysis of COSMIC SBS  
497 v3.2 signatures confirmed resistant *MYBL2* High tumors demonstrate footprints of defective  
498 SSB and TLS effector function (**Supplementary Figure 12**). We also developed FUSED to  
499 nominate error-prone repair pathways responsible for generating genomic fusions detected by  
500 RNA-seq (**Methods**). In *MYBL2* High samples that responded poorly to therapy, we found  
501 evidence of elevated MMEJ activity (**Supplementary Figures 13-16**). Collectively, these  
502 results demonstrate that DNA repair defects and increased error-prone repair potentiating  
503 *MYBL2* High disease is linked to poor responses to chemotherapy and irradiation across tumor  
504 types.

505

506 Lastly, we analyzed patient records to assess for potential differences in metastatic  
507 dissemination (**Methods**). When comparing *MYBL2* High and Low cohorts, we found no  
508 difference in dissemination to sentinel lymph nodes in both LUAD (intra-thoracic lymph nodes)  
509 and ID-BRE (axillary lymph nodes) cohorts (**Figure 7B**). However, we found that *MYBL2* High  
510 tumors demonstrated increased dissemination to distant metastatic sites in both LUAD and ID-  
511 BRE, especially to the brain. Interestingly, we found no difference in the median time to  
512 metastasis between *MYBL2* High and Low cohorts, suggesting that observed patterns reflect  
513 tissue-specific tropisms (**Supplementary Figure 17**). Using combined probability, we found  
514 that *MYBL2* expression dramatically stratifies patient risk at diagnosis for developing brain  
515 metastases during their disease course (**Methods, Figure 7C**). Importantly, these values  
516 match or exceed current genomic markers for brain metastasis risk for both LUAD and ID-BRE  
517 (33). Strikingly, analysis of primary lung adenocarcinoma and paired brain metastasis samples  
518 revealed that *MYBL2* expression significantly increased in 7 of 9 samples (**Figure 7D**). These  
519 data suggest that *MYBL2* may be a putative driver of primary carcinoma to brain metastatic  
520 dissemination.

521

521

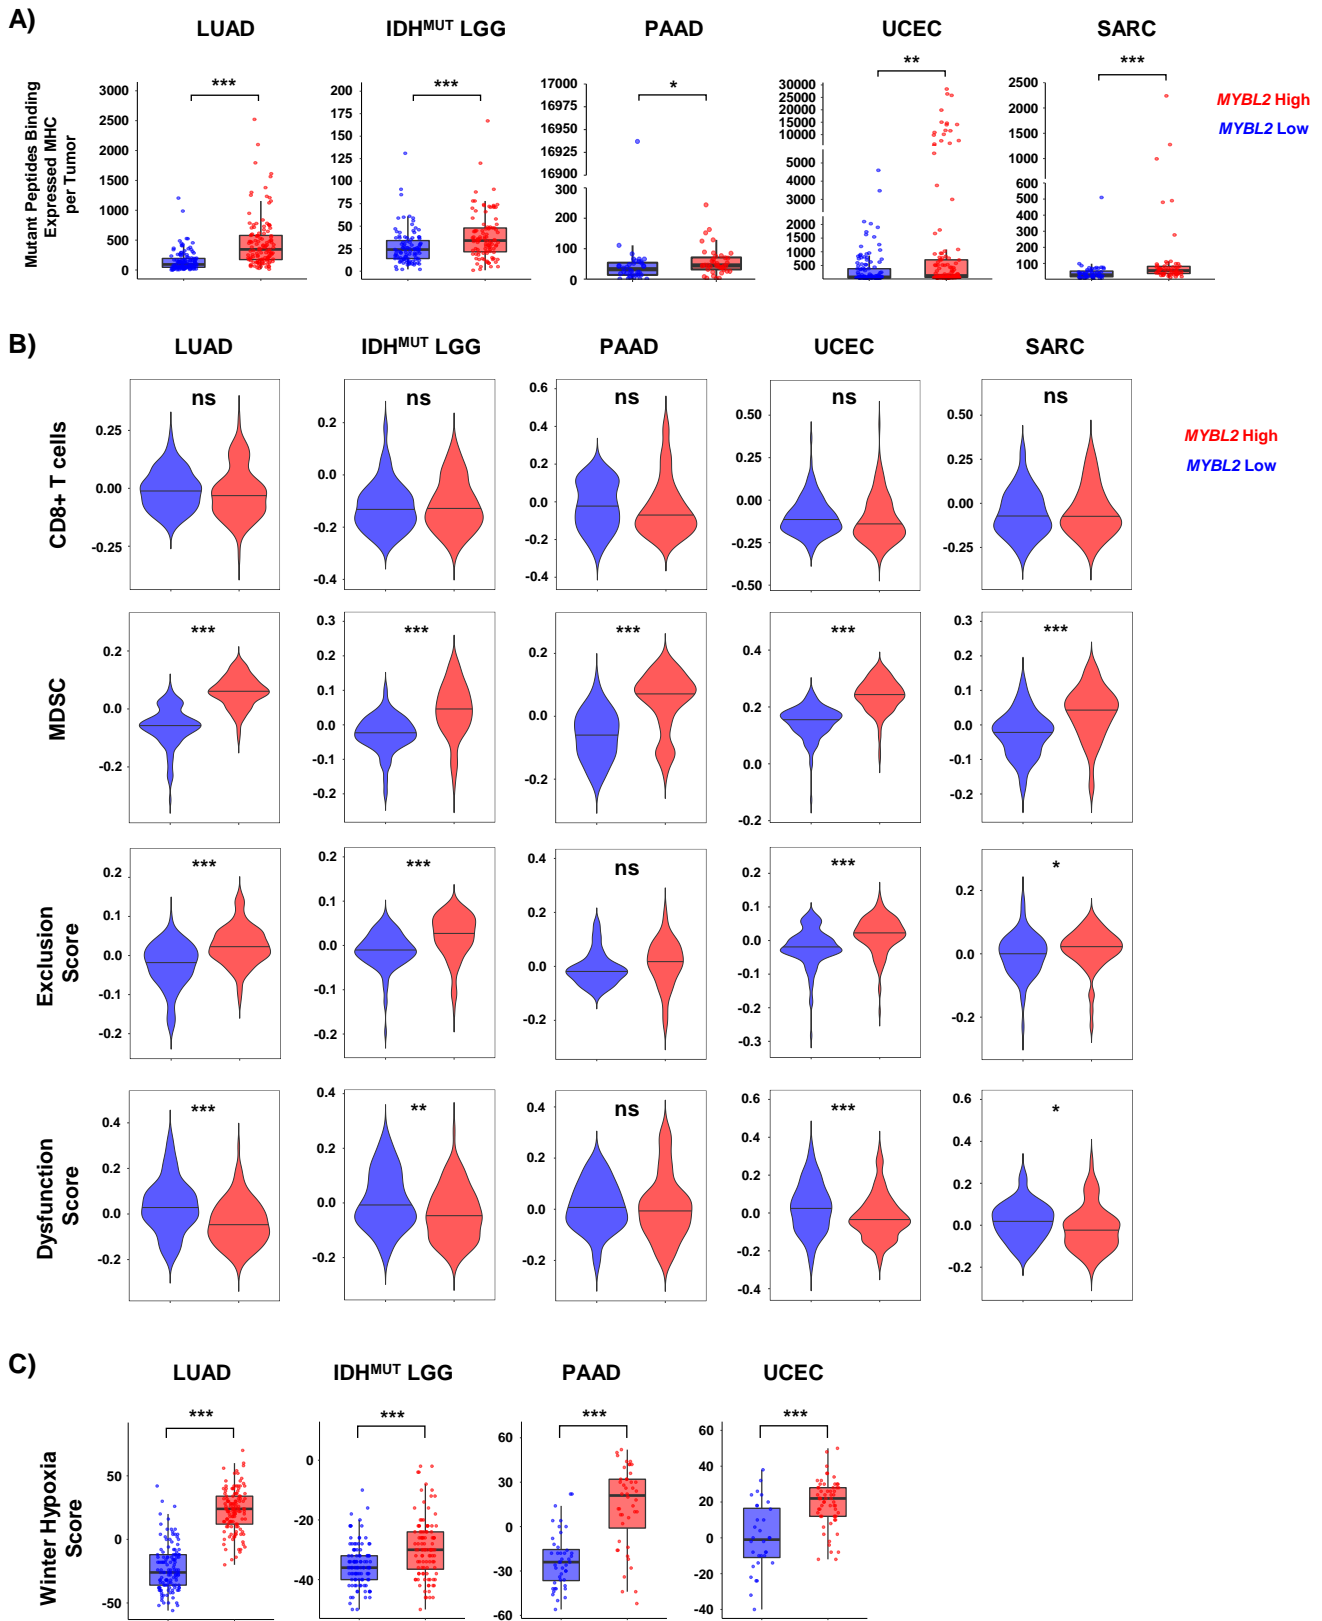

522 **Figure 6: *MYBL2* High tumors exhibit uniquely dysregulated tumor microenvironments.**  
523 **A)** *MYBL2* High tumors contain significantly greater numbers of mutant peptides that bind to  
524 patient-matched, expressed, pMHC complexes. **B)** Immune infiltration estimation algorithms  
525 indicate that *MYBL2* High tumors are significantly more immunosuppressive. **C)** *MYBL2* High  
526 tumors are highly hypoxic. **A), B), C)** Wilcoxon,  $p < 0.05$ , \*;  $p < 0.01$ , \*\*;  $p < 0.001$ , \*\*\*.

## 527 Discussion

528  
529 Across multiple tumor types, elevated *MYBL2* expression identified tumors with  
530 genomic instability, inefficient homologous recombination, and wildtype BRCA (**Figures 1-2**).  
531 Analysis of the DNA repair landscape revealed that the genetic basis of *MYBL2* High disease  
532 are heterozygous losses of SSB, TLS, or NHEJ effectors (**Figure 3**). We found that these  
533 heterozygous losses were linked to elevated replication stress, a shift in intragenic mutation  
534 position, and increased copy number alterations in genes encoded at RSS genomic sites  
535 (**Figure 4**). Functional clustering approaches allowed us to discover that replication stress  
536 promotes copy number alterations that rewire transcriptional programs regulating hallmarks of  
537 cancer master effectors (**Figure 5**). Clinically, this phenotype identifies patients at risk for poor  
538 responses to chemotherapy and irradiation (**Figure 7**). Additionally, our results demonstrate  
539 that patients with *MYBL2* High disease are at increased risk for distant metastases, especially  
540 to the brain (**Figure 7**).

541 In this study, we have identified a new cohort of tumors characterized by replicative  
542 instability (RIN) (**Figure 7E**). Across multiple tumor types, we find that RIN tumors exhibit  
543 significant FGA, increased MSI, and elevated somatic mutations (**Figure 2**). At the  
544 chromosomal level, RIN tumors demonstrate significantly greater levels of intrachromosomal  
545 alterations, such as gene-level gains and heterozygous losses, likely caused by stalled or  
546 collapsed DNA replication intermediates (**Figure 2, Figure 4**). Importantly, we found that RIN  
547 is coincident with heterozygous losses of key SSB, TLS, and NHEJ repair effectors (**Figure**  
548 **3**). As a consequence, RIN tumors upregulate genes controlling the replication stress  
549 response, MMEJ, FA, and checkpoint machinery (**Figure 3**). Unlike chromosomal instability  
550 (CIN), our work supports a model in which RIN accelerates genomic evolution during  
551 replication, as opposed to missegregation during mitosis. It is important to note that RIN  
552 develops across cancer genotypes and tissue types. Analysis of tissue-specific driver events  
553 revealed that RIN was not consistently linked to specific driver alterations (**Figure 1**).  
554 Additionally, we find that RIN develops across cancers in the lung, brain, pancreas, uterus,  
555 connective tissue, breast, and hematopoietic compartment (**Figure 1, Figure 7**). This  
556 phenotype likely extends to other tumor types besides those described here (**Supplementary**  
557 **Table 1**).

558 In this manuscript, we show that elevated *MYBL2* expression and RIN are intimately  
559 linked. As described below, the association of *MYBL2* with RIN is both direct and indirect. In  
560 normal cells, *MYBL2* is transcriptionally and post-translationally regulated by the cell cycle  
561 (34). Specifically, *MYBL2* is transcriptionally upregulated as cells enter S-phase. During S-  
562 phase, *MYBL2* is phosphorylated by CCNA:CDK2 and actively regulates transcription. As cells  
563 progress through G2, *MYBL2* upregulates the expression of FOXM1 and other effectors that  
564 promote G2/M progression. *MYBL2* is then hyper-phosphorylated by CCNA:CDK2 and  
565 targeted for degradation to allow cell division. Given this, elevated expression of *MYBL2*  
566 mRNA is a robust marker of cells that are arrested prior to mitosis. In this study and our  
567 previous work, we have demonstrated that *MYBL2* expression is tightly associated with the  
568 transcriptional upregulation of DNA repair genes that sense replication stress (12). This fits  
569 well when considering the mechanisms through which these signaling pathways coordinate  
570 cell cycle arrest following replication stress. Upon replication stress, ATR activates its effector  
571 kinase, CHK1 (23). CHK1 then phosphorylates CDC25 family members and inhibits their  
572 phosphatase activity, halting cell cycle progression. By doing so, CHK1 prevents  
573 CCNB1:CDK1 activity that prevents cells from progressing to mitosis. Importantly, increased  
574 *MYBL2* expression and transcriptional activity are indirect effects of CHK1 mediated cell cycle

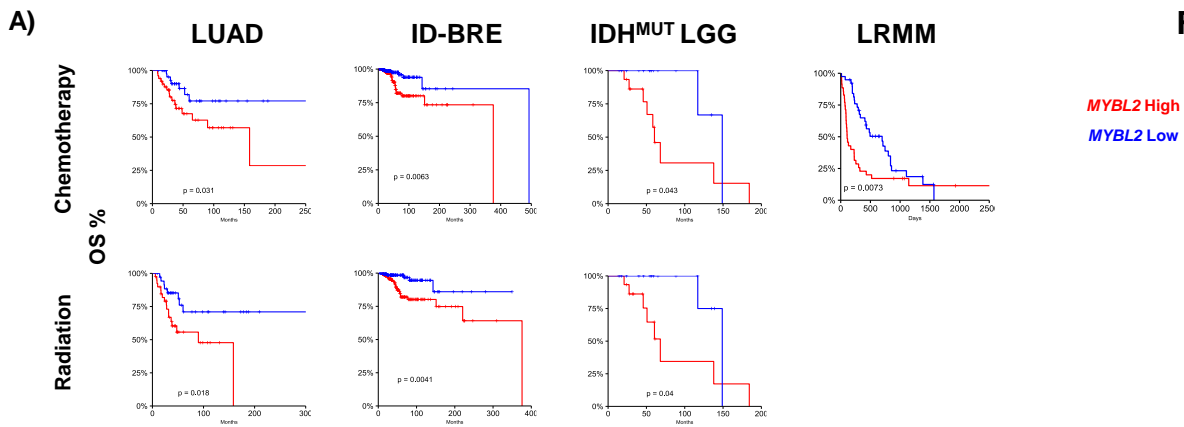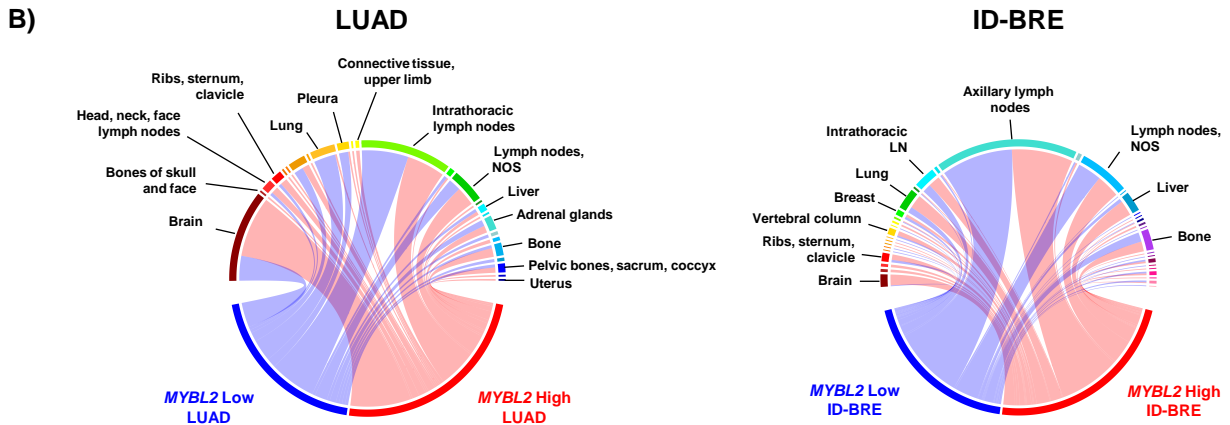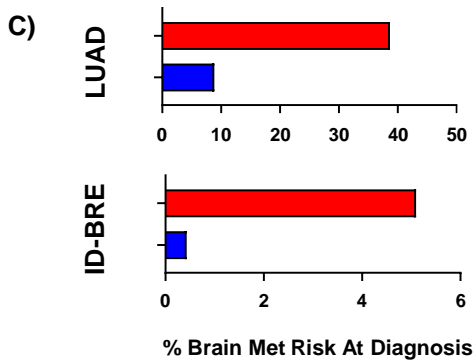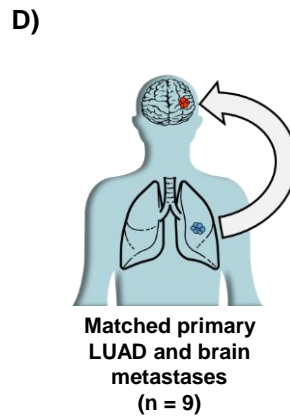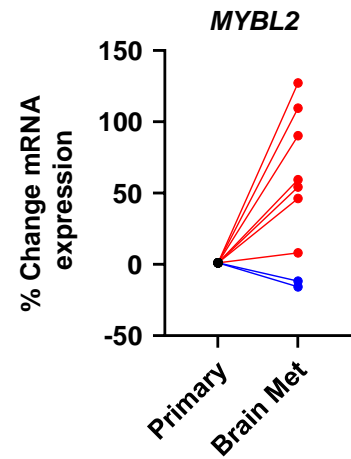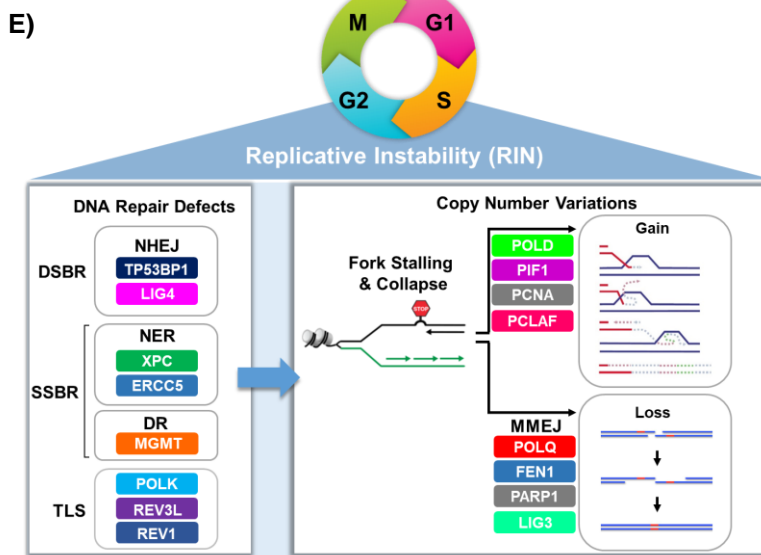



575 **Figure 7: Elevated *MYBL2* expression identifies patients at risk for poor responses to**  
576 **therapy and distant metastases across tumor types. A) *MYBL2* High patients have**  
577 **significantly poorer outcomes when treated with chemotherapy and irradiation regimens. Log-**  
578 **rank test *p*-values are displayed. B) *MYBL2* High tumors metastasize to distant sites at a**  
579 **higher frequency, including to the brain. C) *MYBL2* expression stratifies patient risk at**  
580 **diagnosis for brain metastasis development. LUAD: lung adenocarcinoma. ID-BRE: Invasive**  
581 **ductal breast cancer. IDH<sup>MUT</sup> LGG: IDH-mutant lower grade glioma. LRMM: Late relapse**  
582 **multiple myeloma. D) *MYBL2* expression is increased in brain metastases compared to patient**  
583 **matched primary lung adenocarcinoma tumors. E) Replicative instability (RIN) accelerates**  
584 **genome evolution, driving cancer progression.**

585 arrest. This indicates that increased *MYBL2* expression and activity promotes genomic  
586 evolution during replication, driving RIN. Taken together, increased *MYBL2* expression and  
587 transcriptional activity are robust markers of RIN.

588 Therapy resistance and metastasis are key cancer progression events that directly  
589 impact survival outcomes. Our results indicate that RIN tumors respond poorly to  
590 chemotherapy and irradiation. These findings fit well when considering the genetic background  
591 of these tumors. Chemotherapy and irradiation regimens are designed to overwhelm the  
592 replicative machinery, causing cell death. Several studies have demonstrated that upregulation  
593 of inter-strand crosslink repair (FA), cell cycle checkpoint signaling, and error-prone repair  
594 (MMEJ) pathways confer resistance to these therapies (35-36). Because RIN tumors carry  
595 heterozygous losses in key SSB, TLS, and NHEJ effectors, they experience chronic  
596 replication stress. To cope with this stress, therapy naïve tumors upregulate FA, cell cycle  
597 checkpoint, and MMEJ pathways. In doing so, these tumors become primed for resistance to  
598 DNA damaging therapies. In addition to therapy resistance, heightened replication stress and  
599 elevated error-prone repair pathway activity promote copy number alterations in key regulators  
600 of hallmarks of cancer processes. For instance, we find that this mechanism underlies  
601 dysregulation of *TMEM173*, *JAK2*, *DAPK2*, *BIRC5*, *LIN9*, *LIN37*, *ERBB2*, and *NF1*, among  
602 others (**Figure 5**). Dysregulation of these and other crucial effectors allow cancers to evade  
603 the immune system, resist anoikis driven apoptosis, achieve growth-factor independent  
604 signaling, and move. Additionally, gains in *LIN9* and *LIN37* further potentiate this phenotype by  
605 increasing *MYBL2* expression and transcriptional activity. These alterations dramatically  
606 shorten the molecular time required for developing an aggressive cancer capable of distant  
607 metastases. Consistent with this, we find that *MYBL2* High LUAD and ID-BRE tumors are  
608 more likely to metastasize to distant sites, especially to the brain. Collectively, our results  
609 indicate that RIN is a pan-cancer driver of progressive disease.

610 Our results have important implications for treatment plans and clinical trial design. As  
611 RIN tumors respond poorly to chemotherapy and irradiation, clinical trials should explore  
612 targeted therapy combinations in the therapy refractory setting. Given that RIN tumors display  
613 large quantities of neoantigens, the question of immunotherapy response is highly relevant.  
614 Because therapy naïve RIN tumors exhibit highly hypoxic, MDSC-rich microenvironments, it  
615 may be unlikely that these tumors achieve durable responses to anti-PD1/PDL1 inhibitors.  
616 However, in our ORIEN cohorts, we find that RIN tumors are associated with increased *LAG3*  
617 and *TIGIT* expression, despite showing no difference in *PDL1* (data not shown). This raises  
618 the possibility that new anti-*LAG3* and anti-*TIGIT* immune checkpoint inhibitors may be better  
619 suited for treating RIN tumors. One of our most important discoveries is that increased *MYBL2*  
620 expression, and thus RIN, dramatically stratifies patient risk for brain metastases in LUAD and  
621 ID-BRE. While the average risk for brain metastases for all lung cancers is reported to be 15%,  
622 we find that *MYBL2* High patients have a risk of ~40% while *MYBL2* Low have a risk of less  
623 than 10% (**Figure 7**) (50). A similar dichotomy is observed in ID-BRE, where the reported risk  
624 for brain metastases for breast cancer patients is ~5%. Here, we find that *MYBL2* High ID-BRE  
625 risk is 5% while *MYBL2* Low ID-BRE is <1%. These results strongly argue for increased  
626 screening for brain metastases in patients with *MYBL2* High disease.

627 Moving forward, further study of RIN is urgently needed. Given the aggressive nature of  
628 RIN tumors, immunohistochemistry markers need to be identified and validated. New mouse  
629 models and cell line systems are required in order identify potential therapeutic vulnerabilities  
630 that can be explored in clinical trials. Any advances in identifying and targeting RIN have the  
631 potential to drastically improve patient outcomes across multiple tumor types.

632

## 633 **Methods**

634  
635 **TCGA pan-cancer analysis.** Thirty-two tumor types curated by the TCGA and other groups  
636 were analyzed in this study (13). Where multiple TCGA studies were available, we focused our  
637 analyses on PanCancer studies. Samples with RNA-sequencing data were stratified into  
638 *MYBL2* High and *MYBL2* Low cohorts using normalized mRNA expression values and a  
639 quartile method; the top 25% of samples expressing *MYBL2* mRNA were called *MYBL2* High  
640 and the bottom 25% of samples *MYBL2* Low.

641  
642 **Survival Analyses.** The Kaplan-Meier estimator was used to estimate time-to-event  
643 distributions for OS, DSS, and PFS outcomes. The log-rank test was used to test for significant  
644 differences between distributions using a two-sided test. OS denotes the time from initial  
645 diagnosis until death. DSS is defined as the time from cancer diagnosis until the time of death;  
646 patients who died from other causes were not included. PFS reflects the time from initial  
647 diagnosis until progression or death. For all three survival analyses, patients who did not  
648 experience an event or who were lost to follow-up were censored at the time of last contact.  
649 Kaplan-Meier survival analyses were conducted using survival and survminer R packages  
650 (37).

651  
652 **DNA repair pathway WE score.** A WE score was developed to describe how DNA repair  
653 pathways are regulated in tumors. For each repair pathway, we identified comprehensive lists  
654 of pathway effectors through extensive literature review (19, 21, 23, 38-44). Effectors were  
655 scored based on essentiality to pathway function (Essentiality Scaling Factor: 3 = essential  
656 effector, 2 = important effector or potentially compensable, 1 = accessory effector). The final  
657 WE formula for each pathway is a scaled average where gene mRNA Log2FC values are  
658 multiplied by an essentiality scaling factor (ESF), summed, and divided by the number of  
659 pathway genes.

$$660 \quad WE = \frac{(Gene\ A\ Log2FC)(ESF) + (Gene\ B\ Log2FC)(ESF) + (Gene\ C\ Log2FC)(ESF) + \dots}{\# Pathway\ genes}$$

661  
662  
663 Correlations between WE values were calculated and visualized using stats and corrplot R  
664 packages (45).

665  
666 **COSMIC v3.2 SBS analysis:** COSMIC SBS v3.2 signatures were generated using the  
667 deConstructSigs R package (46). For TCGA cohorts, the TCGA public MAF file  
668 (mc3.v0.2.8.PUBLIC.maf.gz) was used to generate trinucleotide mutation context matrices. For  
669 ORIEN cohorts, individual sample vcf files were used to calculate trinucleotide mutation  
670 contexts. The final deConstructSigs output was computed using the trinucleotide context  
671 matrix and the COSMIC v3.2 SBS mutational signature matrix downloaded from  
672 (<https://cancer.sanger.ac.uk/signatures/downloads/>). Eighteen of the 78 SBS mutational  
673 signatures likely capturing sequence artifacts were excluded. Statistical significance between  
674 average signature weights across samples was assessed using two-sided Student's T-tests.

675  
676 **Replication stress score.** To analyze differences in replication stress, we developed the  
677 replication stress (RS) score. Eight gene ontology (GO) terms were identified that capture key  
678 cellular processes involved in replication stress responses (GO:0031570, GO: 0000076, GO:  
679 006260, GO: 0031261, GO: 004311, GO: 0031297, GO: 0031298, GO: 0071932). Genes were  
680 pooled and redundant entries removed to generate a final gene list (n = 205). The RS score is

681 the sum of gene log<sub>2</sub> mRNA expression values, divided by the total number of genes in the RS  
682 response gene list. Differences in medians were assessed for statistical significance using  
683 Wilcoxon signed rank tests (47).

684  
685

$$RS\ Score = \frac{(Gene\ A\ expression) + (Gene\ B\ expression) + (Gene\ C\ expression) + \dots}{205}$$

687

688 **Mutational position score.** The mutational position score (MPS) was developed to assess  
689 differences in intragenic mutation frequency. Here, the MPS score is the difference between  
690 somatic mutation location and the gene start, divided by gene length.

691

$$MPS = \frac{Mutation\ position\ (bp) - Gene\ start\ (bp)}{Gene\ length\ (bp)}$$

693

694 Mutation locations were obtained from the TCGA public MAF file. Gene start and end positions  
695 were obtained from Ensembl. Differences in mutational position densities were assessed for  
696 statistical significance using Kolmogorov-Smirnov tests.

697

698 **RSS genomic site alteration analysis.** RSS genomic sites were identified by Barlow et al.  
699 (26) and Macheret et al. (27). ERFS were obtained from Table S1  
700 “Ordered\_List\_of\_ERFS\_Hot\_Spots” (26). These genes were mapped to human gene  
701 identifiers using the nichenetr R package (48). A list of MiDAS sites was obtained from  
702 Supplementary Table S1 (27). Sites were filtered to include MiDAS sites attributable to one or  
703 two genes (removes unmappable intergenic sites). Final ERFS and MiDAS sites were merged  
704 to identify any overlapping genes. This merge identified 20 genes identified as ERFS but  
705 recently defined as MiDAS sites. These genes were subsequently removed from the ERFS list  
706 and only analyzed in the MiDAS list. Copy number alteration and somatic mutation frequencies  
707 were plotted using ggplot2 and ggridges R packages. Differences in medians were assessed  
708 for statistical significance using Wilcoxon signed rank tests (47).

709

710 **RSS site functional analysis.** ERFS and MiDAS genes were combined into a single list and  
711 analyzed for broad biologic processes using WebGestalt’s over-representation analysis  
712 feature. From this analysis, thirteen functional clusters were defined and genes were binned  
713 into clusters following literature review (**Supplementary Table 5**). Single-cell RNA expression  
714 data from the Human Protein Atlas was used to ensure genes were expressed in tissues  
715 relevant to our tumor cohorts. This final gene list with functional cluster annotation was then  
716 merged with differential expression RNA-seq tables. Combined copy number and RNA-seq  
717 expression files were analyzed and genes with significant copy number and transcriptional  
718 differences were identified (**Supplementary Table 6**). Circular packing diagrams were drawn  
719 using ggraph and igraph R packages (49).

720

721 **Tumor microenvironment analysis.** Immune cell infiltration estimates were generated using  
722 RSEM gene normalized values and the ConsensusTME R package (31). Individual tumor type  
723 infiltration estimates were calculated separately using tumor specific gene sets and a ssgsea  
724 method. Myeloid derived suppressor cell (MDSC) infiltration estimates, Dysfunction, and  
725 Exclusion Scores, were downloaded from the TIDE database (32).

726

727 **ORIEN therapy response analysis.** Data from 25 tumor types provided by ORIEN in the May  
728 2021 private cBioPortal instance were analyzed. For samples with RNA-seq data, we manually  
729 reviewed treatment records to identify patients treated with chemotherapeutics and/or  
730 irradiation. For treatment specific cohorts, we used normalized RNA expression values to  
731 stratify patients into *MYBL2* High and *MYBL2* Low cohorts using a quartile method. Kaplan-  
732 Meier analyses were performed as described above.

733  
734 **FUSED.** FUSion Error-prone repair Detection (FUSED) was developed to map the origin of  
735 RNA-seq detected fusions. FUSED identifies fusions with closest similarity to NHEJ, single  
736 strand annealing (SSA), MMEJ, break induced replication (BIR), or microhomology mediated  
737 break induced replication (MMBIR). Tool rules were determined through literature review (51).  
738 FUSED is publicly available, <https://github.com/databio/FUSED>.

739  
740 **ORIEN metastatic dissemination analysis.** ORIEN medical records were manually reviewed  
741 to identify sites of metastatic disease. Metastatic dissemination routes were plotted using the  
742 circlize R package (50). Medical records were used to calculate the time from diagnosis to  
743 metastatic disease development. Time to metastatic disease distributions were plotted using  
744 the swimplot R package. Differences in time to metastasis data were assessed using Wilcoxon  
745 signed rank tests (47). Brain metastasis risk was calculated by multiplying the number of  
746 patients that develop metastatic disease by the number of patients with brain metastases. This  
747 fraction was multiplied by 100% to generate the final risk percentage.

748  
749 **Statistical analyses.** Statistical tests for all analyses are indicated in accompanying figure  
750 legends. For all boxplots, data are graphed as minimum, 1<sup>st</sup> quartile, median, 3<sup>rd</sup>, quartile, and  
751 maximum. *p* and *q* values < 0.05 were considered statistically significant.

## 752 753 **References**

- 754  
755 1. The Cancer Genome Atlas Research Network. Comprehensive molecular profiling of  
756 lung adenocarcinoma. *Nature*. 2014;511:543–50.
- 757 2. The Cancer Genome Atlas Research Network. Comprehensive, Integrative Genomic  
758 Analysis of Diffuse Lower-Grade Gliomas. *N Engl J Med*. 2015;372:2481–98.
- 759 3. Raphael BJ, Hruban RH, Aguirre AJ, Moffitt RA, Yeh JJ, Stewart C, et al. Integrated  
760 Genomic Characterization of Pancreatic Ductal Adenocarcinoma. *Cancer Cell*.  
761 2017;32:185-203.e13.
- 762 4. The Cancer Genome Atlas Research Network, Levine DA. Integrated genomic  
763 characterization of endometrial carcinoma. *Nature*. 2013;497:67–73.
- 764 5. Abeshouse A, Adebamowo C, Adebamowo SN, Akbani R, Akeredolu T, Ally A, et al.  
765 Comprehensive and Integrated Genomic Characterization of Adult Soft Tissue  
766 Sarcomas. *Cell*. 2017;171:950-965.e28.
- 767 6. Hanahan D, Weinberg RA. The Hallmarks of Cancer. *Cell*. 2000;100:57–70.
- 768 7. Hanahan D, Weinberg RA. Hallmarks of Cancer: The Next Generation. *Cell*.  
769 2011;144:646–74.
- 770 8. Negrini S, Gorgoulis VG, Halazonetis TD. Genomic instability — an evolving hallmark of  
771 cancer. *Nat Rev Mol Cell Biol*. 2010;11:220–8.
- 772 9. Turner N, Tutt A, Ashworth A. Hallmarks of “BRCAness” in sporadic cancers. *Nat Rev*  
773 *Cancer*. 2004;4:814–9.

- 774 10. Yap TA, Plummer R, Azad NS, Helleday T. The DNA Damaging Revolution: PARP  
775 Inhibitors and Beyond. American Society of Clinical Oncology Educational Book.  
776 2019;185–95.
- 777 11. Pilié PG, Gay CM, Byers LA, O'Connor MJ, Yap TA. PARP Inhibitors: Extending Benefit  
778 Beyond *BRCA* -Mutant Cancers. Clin Cancer Res. 2019;25:3759–71.
- 779 12. Morris BB, Wages NA, Grant PA, Stukenberg PT, Gentzler RD, Hall RD, et al. MYBL2-  
780 Driven Transcriptional Programs Link Replication Stress and Error-prone DNA Repair  
781 With Genomic Instability in Lung Adenocarcinoma. Front Oncol. 2021;10:585551.
- 782 13. Gao J, Aksoy BA, Dogrusoz U, Dresdner G, Gross B, Sumer SO, et al. Integrative  
783 Analysis of Complex Cancer Genomics and Clinical Profiles Using the cBioPortal.  
784 Science Signaling. 2013;6:pl1–pl1.
- 785 14. Knijnenburg TA, Wang L, Zimmermann MT, Chambwe N, Gao GF, Cherniack AD, et al.  
786 Genomic and Molecular Landscape of DNA Damage Repair Deficiency across The  
787 Cancer Genome Atlas. Cell Reports. 2018;23:239-254.e6.
- 788 15. Niu B, Ye K, Zhang Q, Lu C, Xie M, McLellan MD, et al. MSIsensor: microsatellite  
789 instability detection using paired tumor-normal sequence data. Bioinformatics.  
790 2014;30:1015–6.
- 791 16. Pitroda SP, Pashtan IM, Logan HL, Budke B, Darga TE, Weichselbaum RR, et al. DNA  
792 Repair Pathway Gene Expression Score Correlates with Repair Proficiency and Tumor  
793 Sensitivity to Chemotherapy. Science Translational Medicine. 2014;6:229ra42-229ra42.
- 794 17. Leu S, von Felten S, Frank S, Vassella E, Vajtai I, Taylor E, et al. IDH/MGMT-driven  
795 molecular classification of low-grade glioma is a strong predictor for long-term survival.  
796 Neuro-Oncology. 2013;15:469–79.
- 797 18. PCAWG Mutational Signatures Working Group, PCAWG Consortium, Alexandrov LB,  
798 Kim J, Haradhvala NJ, Huang MN, et al. The repertoire of mutational signatures in  
799 human cancer. Nature. 2020;578:94–101.
- 800 19. Scharer OD. Nucleotide Excision Repair in Eukaryotes. Cold Spring Harbor  
801 Perspectives in Biology. 2013;5:a012609–a012609.
- 802 20. Nik-Zainal S, Kucab JE, Morganella S, Glodzik D, Alexandrov LB, Arlt VM, et al. The  
803 genome as a record of environmental exposure. MUTAGE. 2015;gev073.
- 804 21. Yang W, Gao Y. Translesion and Repair DNA Polymerases: Diverse Structure and  
805 Mechanism. Annu Rev Biochem. 2018;87:239–61.
- 806 22. Aguilera A, García-Muse T. Causes of Genome Instability. Annu Rev Genet. 2013;47:1–  
807 32.
- 808 23. Lanz MC, Dibitto D, Smolka MB. DNA damage kinase signaling: checkpoint and repair  
809 at 30 years. EMBO J [Internet]. 2019 [cited 2022 Mar 31];38. Available from:  
810 <https://onlinelibrary.wiley.com/doi/10.15252/emboj.2019101801>
- 811 24. Zeman MK, Cimprich KA. Causes and consequences of replication stress. Nat Cell Biol.  
812 2014;16:2–9.
- 813 25. Weise. Global screening and extended nomenclature for 230 aphidicolin-inducible  
814 fragile sites, including 61 yet unreported ones. Int J Oncol [Internet]. 2010 [cited 2022  
815 Mar 31];36. Available from: <http://www.spandidos-publications.com/ijo/36/4/929>
- 816 26. Barlow JH, Faryabi RB, Callén E, Wong N, Malhowski A, Chen HT, et al. Identification  
817 of Early Replicating Fragile Sites that Contribute to Genome Instability. Cell.  
818 2013;152:620–32.
- 819 27. Macheret M, Bhowmick R, Sobkowiak K, Padayachy L, Mailler J, Hickson ID, et al.  
820 High-resolution mapping of mitotic DNA synthesis regions and common fragile sites in  
821 the human genome through direct sequencing. Cell Res. 2020;30:997–1008.

- 822 28. Briu L-M, Maric C, Cadoret J-C. Replication Stress, Genomic Instability, and Replication  
823 Timing: A Complex Relationship. *IJMS*. 2021;22:4764.
- 824 29. Stok C, Kok YP, van den Tempel N, van Vugt MATM. Shaping the BRCAness  
825 mutational landscape by alternative double-strand break repair, replication stress and  
826 mitotic aberrancies. *Nucleic Acids Research*. 2021;49:4239–57.
- 827 30. Thorsson V, Gibbs DL, Brown SD, Wolf D, Bortone DS, Ou Yang T-H, et al. The  
828 Immune Landscape of Cancer. *Immunity*. 2018;48:812-830.e14.
- 829 31. Jiménez-Sánchez A, Cast O, Miller ML. Comprehensive Benchmarking and Integration  
830 of Tumor Microenvironment Cell Estimation Methods. *Cancer Res*. 2019;79:6238–46.
- 831 32. Jiang P, Gu S, Pan D, Fu J, Sahu A, Hu X, et al. Signatures of T cell dysfunction and  
832 exclusion predict cancer immunotherapy response. *Nat Med*. 2018;24:1550–8.
- 833 33. Suh JH, Kotecha R, Chao ST, Ahluwalia MS, Sahgal A, Chang EL. Current approaches  
834 to the management of brain metastases. *Nat Rev Clin Oncol*. 2020;17:279–99.
- 835 34. Musa J, Aynaud M-M, Mirabeau O, Delattre O, Grünewald TG. MYBL2 (B-Myb): a  
836 central regulator of cell proliferation, cell survival and differentiation involved in  
837 tumorigenesis. *Cell Death and Disease*. 2017;8:e2895.
- 838 35. Huang R, Zhou P-K. DNA damage repair: historical perspectives, mechanistic pathways  
839 and clinical translation for targeted cancer therapy. *Sig Transduct Target Ther*.  
840 2021;6:254.
- 841 36. Wang Z, Song Y, Li S, Kurian S, Xiang R, Chiba T, et al. DNA polymerase  $\theta$  (POLQ) is  
842 important for repair of DNA double-strand breaks caused by fork collapse. *J Biol Chem*.  
843 2019;294:3909–19.
- 844 37. A. Kassambara, M. Kosinski, and P. Biecek (2019). survminer: Drawing Survival Curves  
845 using 'ggplot2.' R package version 0.4.5. [https://CRAN.R-](https://CRAN.R-project.org/package=survminer)  
846 [project.org/package=survminer](https://CRAN.R-project.org/package=survminer)
- 847 38. Krokan HE, Bjoras M. Base Excision Repair. *Cold Spring Harbor Perspectives in*  
848 *Biology*. 2013;5:a012583–a012583.
- 849 39. Jiricny J. The multifaceted mismatch-repair system. *Nat Rev Mol Cell Biol*. 2006;7:335–  
850 46.
- 851 40. Yi C, He C. DNA Repair by Reversal of DNA Damage. *Cold Spring Harbor Perspectives*  
852 *in Biology*. 2013;5:a012575–a012575.
- 853 41. Stinson BM, Loparo JJ. Repair of DNA Double-Strand Breaks by the Nonhomologous  
854 End Joining Pathway. *Annu Rev Biochem*. 2021;90:137–64.
- 855 42. Krejci L, Altmannova V, Spirek M, Zhao X. Homologous recombination and its  
856 regulation. *Nucleic Acids Research*. 2012;40:5795–818.
- 857 43. Ceccaldi R, Sarangi P, D'Andrea AD. The Fanconi anaemia pathway: new players and  
858 new functions. *Nat Rev Mol Cell Biol*. 2016;17:337–49.
- 859 44. Black SJ, Ozdemir AY, Kashkina E, Kent T, Rusanov T, Ristic D, et al. Molecular basis  
860 of microhomology-mediated end-joining by purified full-length Pol $\theta$ . *Nat Commun*.  
861 2019;10:4423.
- 862 45. Taiyun Wei and Viliam Simko (2021). R package 'corrplot': Visualization of a Correlation  
863 Matrix (Version 0.92). Available from <https://github.com/taiyun/corrplot>.
- 864 46. Rosenthal R, McGranahan N, Herrero J, Taylor BS, Swanton C. deconstructSigs:  
865 delineating mutational processes in single tumors distinguishes DNA repair deficiencies  
866 and patterns of carcinoma evolution. *Genome Biol*. 2016;17:31.
- 867 47. Alboukadel Kassambara (2020). ggpubr: 'ggplot2' Based Publication Ready Plots. R  
868 package version 0.4.0. <https://CRAN.R-project.org/package=ggpubr>

- 869 48. Robin Browaeys, Wouter Saelens, Yvan Saeys (2019) NicheNet: Modeling intercellular  
870 communication by linking ligands to target genes. *Nature Methods*.  
871 49. Csardi G, Nepusz T: The igraph software package for complex network research,  
872 *InterJournal, Complex Systems* 1695. 2006. <https://igraph.org>  
873 50. Gu, Z. (2014) circlize implements and enhances circular visualization in R.  
874 *Bioinformatics*.  
875 51. Ottaviani D, LeCain M, Sheer D. The role of microhomology in genomic structural  
876 variation. *Trends in Genetics*. 2014;30:85–94.  
877  
878

## 879 **Acknowledgements**

880  
881 The authors would like to acknowledge the following ORIEN member institutions for their  
882 commitment to data sharing and for contributing samples to this study: the University of  
883 Virginia Comprehensive Cancer Center, Moffitt Cancer Center, The Ohio State University  
884 Comprehensive Cancer Center, Markey Cancer Center, Huntsman Cancer Institute, University  
885 of Southern California Norris Comprehensive Cancer Center, Indiana University Melvin and  
886 Bren Simon Comprehensive Cancer Center, University of Iowa Holden Comprehensive Cancer  
887 Center, Roswell Park Comprehensive Cancer Center, University of Colorado Comprehensive  
888 Cancer Center, Emory Winship Cancer Institute, Rutgers Cancer Institute of New Jersey, and  
889 Stephenson Cancer Center. ORIEN molecular data analyzed in this study were managed by  
890 M2Gen under the Total Cancer Care (TCC) protocol at ORIEN member institutions. The  
891 authors also acknowledge the contributions of each institution's ORIEN Team and  
892 biorepository and tissue research facility staff in the consent of patients, specimen  
893 procurement, specimen processing, data abstraction, and providing access to molecular and  
894 clinical data (UVA IRB HSR 18445, HCI IRB #89989, Moffitt Advarra IRB Pro00014441,  
895 Markey IRB #44224, Emory Winship IRB # 00095411, USC Norris HS-16-00050, Stephenson  
896 Cancer Center IRB #8323, University of Iowa Holden IRBs #201708847 and 201003791,  
897 University of Colorado Comprehensive Cancer Center IRB # 15-1110, Indiana University  
898 Melvin and Bren Simon Comprehensive Cancer Center IRB # 1807389306, and Roswell Park  
899 Comprehensive Cancer Center IRB # I 03103.). We are also grateful for the expert assistance  
900 and service of the PKPD Core at Moffitt Cancer Center as well as the members of the  
901 Pentecost Family Myeloma Research Center (PRMC) at Moffitt. The authors thank Gabriel De  
902 Avilla and Raghu Reddy Alugubelli for their help in multiple myeloma sample processing. The  
903 authors sincerely thank our patients and their families for donating their samples for research  
904 purposes. The authors would like to thank Dr. Yuh-Hwa Wang and Heather Raimer-Young for  
905 their insightful discussions and comments.  
906

## 907 **Funding**

908  
909 This work was supported by the National Cancer Institute (NCI Cancer Center Support Grant  
910 P30 CA44579 to BBM; NCI R01 CA192399 to MWM; NCI U54 CA193489 to KHS and AS; NCI  
911 R01 CA234617 to DRJ; NCI R01 CA108633, NCI R01 CA169368, RC2 CA148190, and U10  
912 CA180850 to AC), The Robert R. Wagner Fellowship Fund (to BBM), the Pentecost Family  
913 Foundation (to KHS and AS), the LUNGeivity Career Development Award (to DHO). Patient  
914 consent, specimen procurement, specimen processing, data abstraction, and access to  
915 molecular and clinical data were supported in part by the University of Virginia Comprehensive  
916 Cancer Center Support Grant (CCSG) P30CA044579, Moffitt CCSG P30-CA076292, Emory



917 Winship CCSG P30CA138292, Ohio State CCSG P30CA016058, University of Southern  
918 California Norris CCSG P30CA014089, University of Iowa Holden CCSG P30CA086862,  
919 University of Colorado Comprehensive Cancer Center CCSG P30CA046934, Indiana  
920 University Melvin and Bren Simon Comprehensive Cancer Center CCSG P30CA082709,  
921 Roswell Park Comprehensive Cancer Center CCSG P30CA016056, Rutgers Cancer Institute  
922 of New Jersey CCSG P30CA072720, and University of Utah Huntsman Cancer Institute CCSG  
923 P30CA042014. Funding sources listed were not involved in the design of this study, the  
924 analysis or interpretation of the data, the writing of this manuscript, or the decision to submit for  
925 publication.

926

## 927 **Author Contributions**

928

929 BBM conceptualized the study, conducted formal analysis, visualized data, developed  
930 software, wrote the original draft, reviewed, and edited the manuscript, and acquired funding to  
931 support this study. JPS conducted formal analysis, developed software, and reviewed and  
932 edited the final submission. QZ, ZJ, OAH, and MLC performed formal analysis, curated data,  
933 conducted formal analysis, data visualization, and helped review and edit the final manuscript.  
934 SMA, DHO, JEG, PMD, HHS, DGS, HC, AC, MV, KHS, AS, JLV, VFB, WLA, RDG, RDH,  
935 CBM, CMU, ARP, DAN, EAS and JML provided resources and wrote, edited, and reviewed the  
936 manuscript. DRJ and PTS wrote, reviewed, and edited the manuscript. MWM conceptualized  
937 the study, acquired funding, supervised the study, and wrote, reviewed, and edited the  
938 manuscript. All authors contributed to the article and approved the submitted version.

939

## 940 **Data availability statement**

941

942 Some data analyzed in this study are subject to the following licenses/restrictions: Access to  
943 ORIEN data is controlled by M2Gen and the ORIEN consortium. Requests to access these  
944 datasets should be directed to <https://www.oriencancer.org/request-an-account>. Publicly  
945 available data sets were analyzed in this study. Tumor type specific survival, clinical, and  
946 genomic data can be found in cBioPortal (<https://www.cbioportal.org/>) under the following  
947 studies: Lung Adenocarcinoma (TCGA, PanCancer Atlas), Brain Lower Grade Glioma (TCGA,  
948 PanCancer Atlas), Pancreatic Adenocarcinoma (TCGA, PanCancer Atlas), Uterine Corpus  
949 Endometrial Carcinoma (TCGA, PanCancer Atlas), and Sarcoma (TCGA, PanCancer Atlas).  
950 Mutation Position Scores were generated using TCGA MAF file mc3.v0.2.8.PUBLIC.maf.gz  
951 ([gdc.cancer.gov/about-data/publications/pancanatlas](https://gdc.cancer.gov/about-data/publications/pancanatlas)). Copy number analyses for MiDAS and  
952 ERFS genes were conducted using SCNv gene level, GITSTIC 2 thresholded files for LUAD,  
953 LGG, PAAD, UCEC, and SARC studies ([linkedomics.org](https://linkedomics.org)). ConsensusTME scores were  
954 generated using RSEM gene normalized RNA-seq files downloaded from GDAC FireBrowse  
955 ([firebrowse.org](https://firebrowse.org)) for each tumor study. Neoantigen and pMHC data are available from  
956 Thorsson et al. (Supplementary files:  
957 TCGA\_PCA.mc3.v0.2.8.CONTROLLED.filtered.sample\_neoantigens.10062017.tsv,  
958 TCGA\_pMHC\_SNV\_sampleSummary\_MC3\_v0.2.8.CONTROLLED.170404.tsv,  
959 [gdc.cancer.gov/about-data/publications/panimmune](https://gdc.cancer.gov/about-data/publications/panimmune)). MDSC infiltration, tumor dysfunction, and  
960 tumor exclusion scores were downloaded from the TIDE: Tumor Immune Dysfunction and  
961 Exclusion database ([tide.dfci.harvard.edu/download](https://tide.dfci.harvard.edu/download)). Genomic data and DNA repair metrics  
962 are available from Knijnenburg et al. (Supplementary file "TCGA\_DDR\_Data\_Resources.xlsx").

963

964

965 **Supplementary Figures**

966  
967 **Figure\_S1: *MYBL2* High lung adenocarcinoma replication stress sensitive site labeled**  
968 **functional cluster analysis.**

969  
970 **Figure\_S2: *MYBL2* High IDH-mutant lower grade glioma replication stress sensitive site**  
971 **labeled functional cluster analysis.**

972  
973 **Figure\_S3: *MYBL2* High pancreatic adenocarcinoma replication stress sensitive site**  
974 **labeled functional cluster analysis.**

975  
976 **Figure\_S4: *MYBL2* High endometrial carcinoma replication stress sensitive site labeled**  
977 **functional cluster analysis.**

978  
979 **Figure\_S5: *MYBL2* High sarcoma replication stress sensitive site labeled functional**  
980 **cluster analysis.**

981  
982 **Figure\_S6: Lung adenocarcinoma ConsensusTME and TIDE analysis.**

983  
984 **Figure\_S7: IDH-mutant lower grade glioma ConsensusTME and TIDE analysis.**

985  
986 **Figure\_S8: Pancreatic adenocarcinoma ConsensusTME and TIDE analysis.**

987  
988 **Figure\_S9: Endometrial carcinoma ConsensusTME and TIDE analysis.**

989  
990 **Figure\_S10: Sarcoma ConsensusTME and TIDE analysis.**

991  
992 **Figure\_S11: Hypoxia score analysis.**

993  
994 **Figure\_S12: ORIEN COSMIC SBS 3.2 analysis.**

995  
996 **Figure\_S13: ORIEN LUAD *MYBL2* High Low therapy FUSED analysis.**

997  
998 **Figure\_S14: ORIEN ID-BRE *MYBL2* High Low therapy FUSED analysis.**

999  
1000 **Figure\_S15: ORIEN IDH<sup>MUT</sup> LGG *MYBL2* High Low therapy FUSED analysis.**

1001  
1002 **Figure\_S16: ORIEN LRMM *MYBL2* High Low therapy FUSED analysis.**

1003  
1004 **Figure\_S17: ORIEN time to metastasis swimmer plots.**

1005  
1006  
1007 **Supplementary Data**

1008  
1009 **Supplementary\_Table\_1: Excel sheet detailing log-rank *p* values for *MYBL2* High vs. *MYBL2***  
1010 **Low OS, DSS, PFS outcomes across tumor types.**

1011

1012 **Supplementary\_Table\_2:** Excel sheet containing final *MYBL2* High and Low patient identifiers  
1013 and clinical data for all five tumor types.

1014  
1015 **Supplementary\_Table\_3:** Excel sheet containing WE pathway score data for *MYBL2* High vs  
1016 *MYBL2* Low tumors.

1017  
1018 **Supplementary\_Table\_4:** Excel sheet containing replication stress score genes.

1019  
1020 **Supplementary\_Table\_5:** Excel sheet containing replication stress sensitive site function  
1021 cluster annotation.

1022  
1023 **Supplementary\_Table\_6:** Excel sheet containing final replication stress sensitive site copy  
1024 number alteration percentages along with RNA-seq differential expression values for all tumor  
1025 cohorts.

1026  
1027 **Supplementary\_Table\_7:** Excel sheet containing patient cohort numbers for TCGA and  
1028 ORIEN Kaplan-Meier survival analyses in Figures 1 and 7

1029  
1030

# LUAD

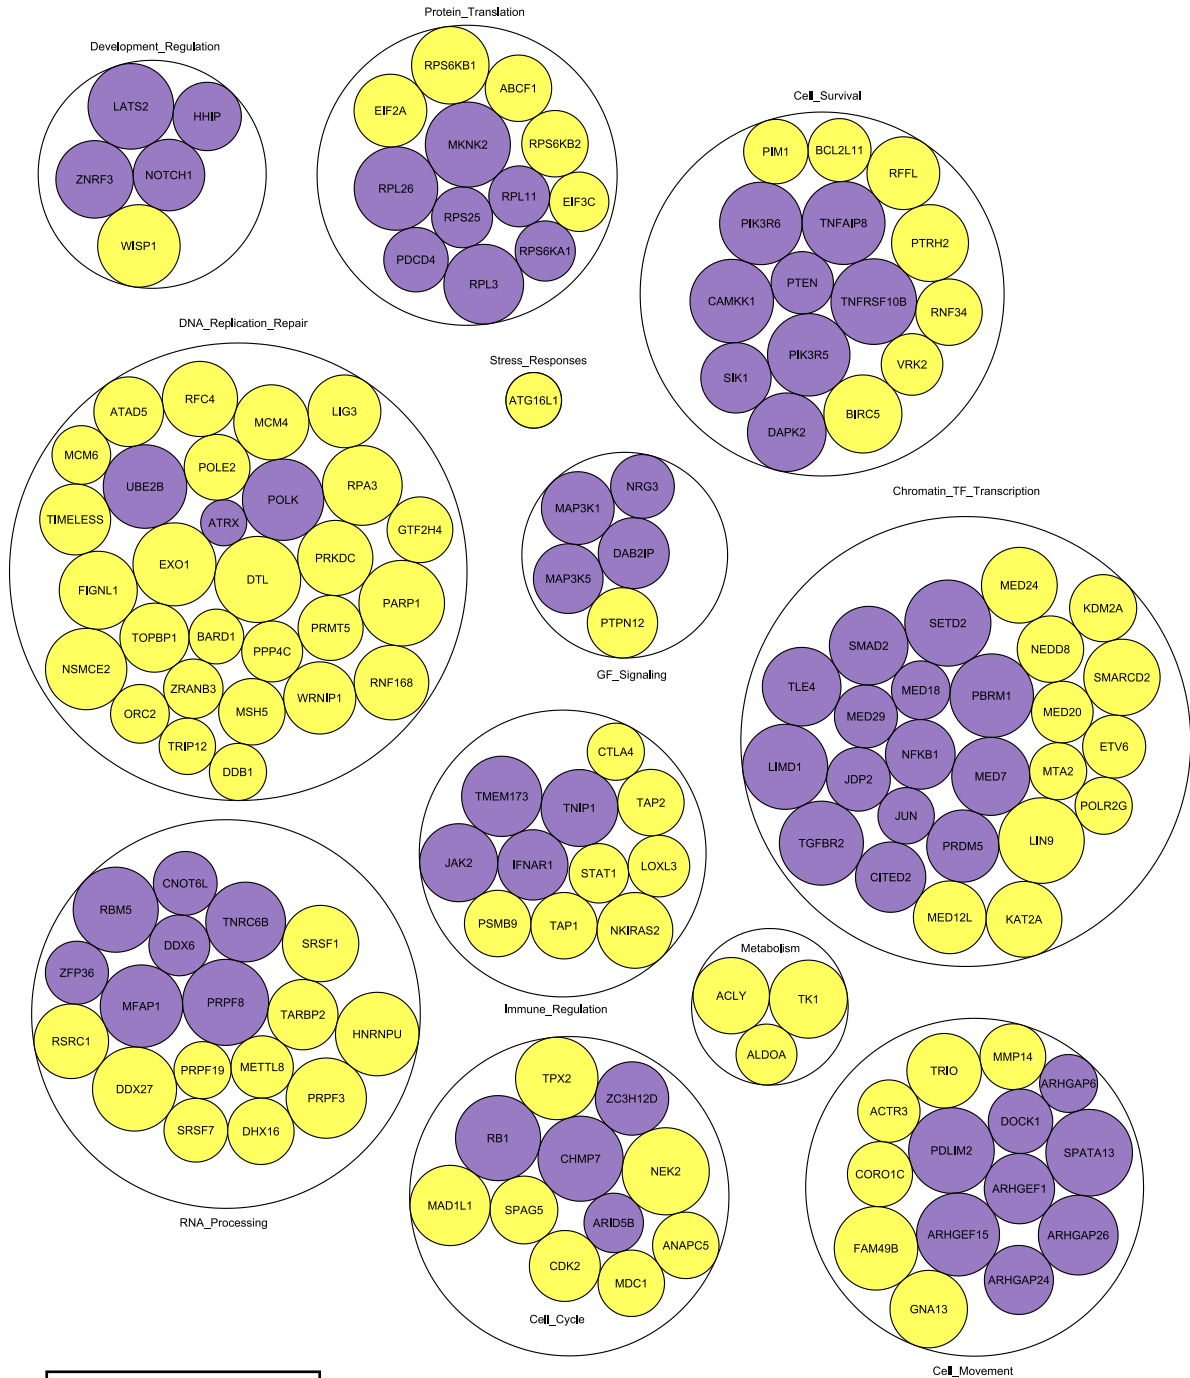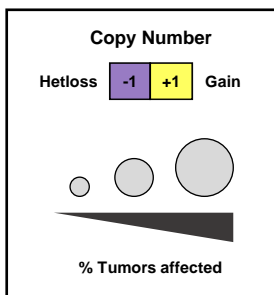

# IDH<sup>MUT</sup> LGG

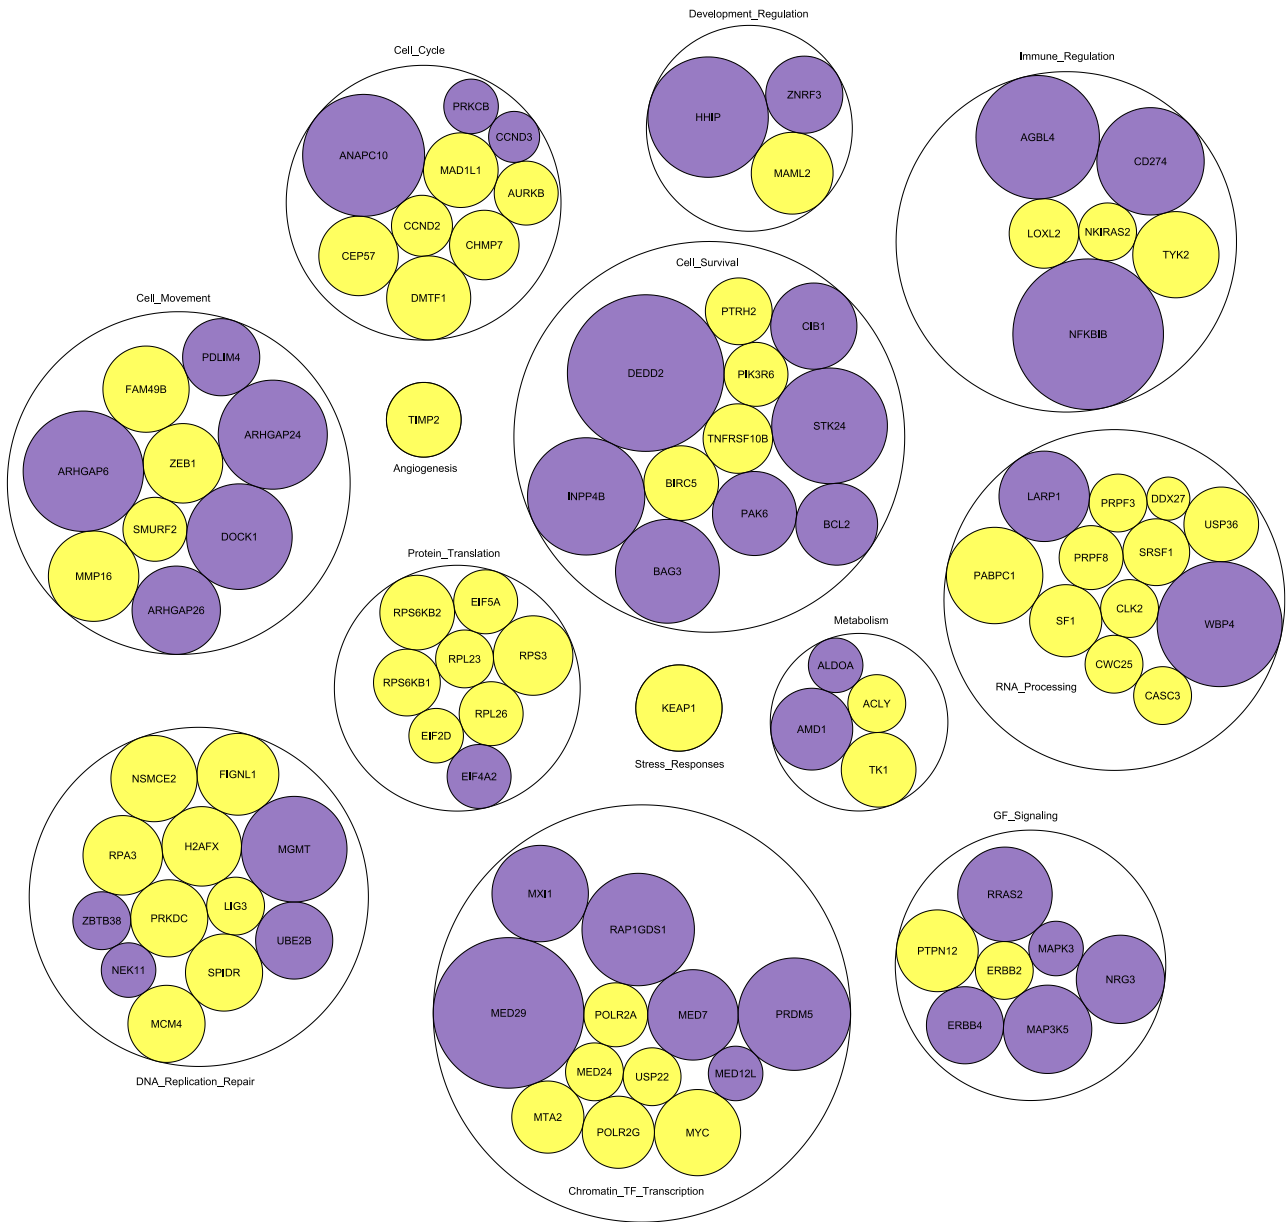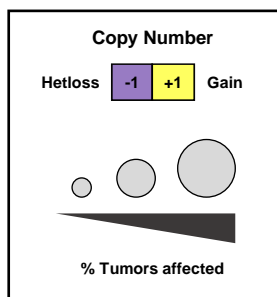

# PAAD

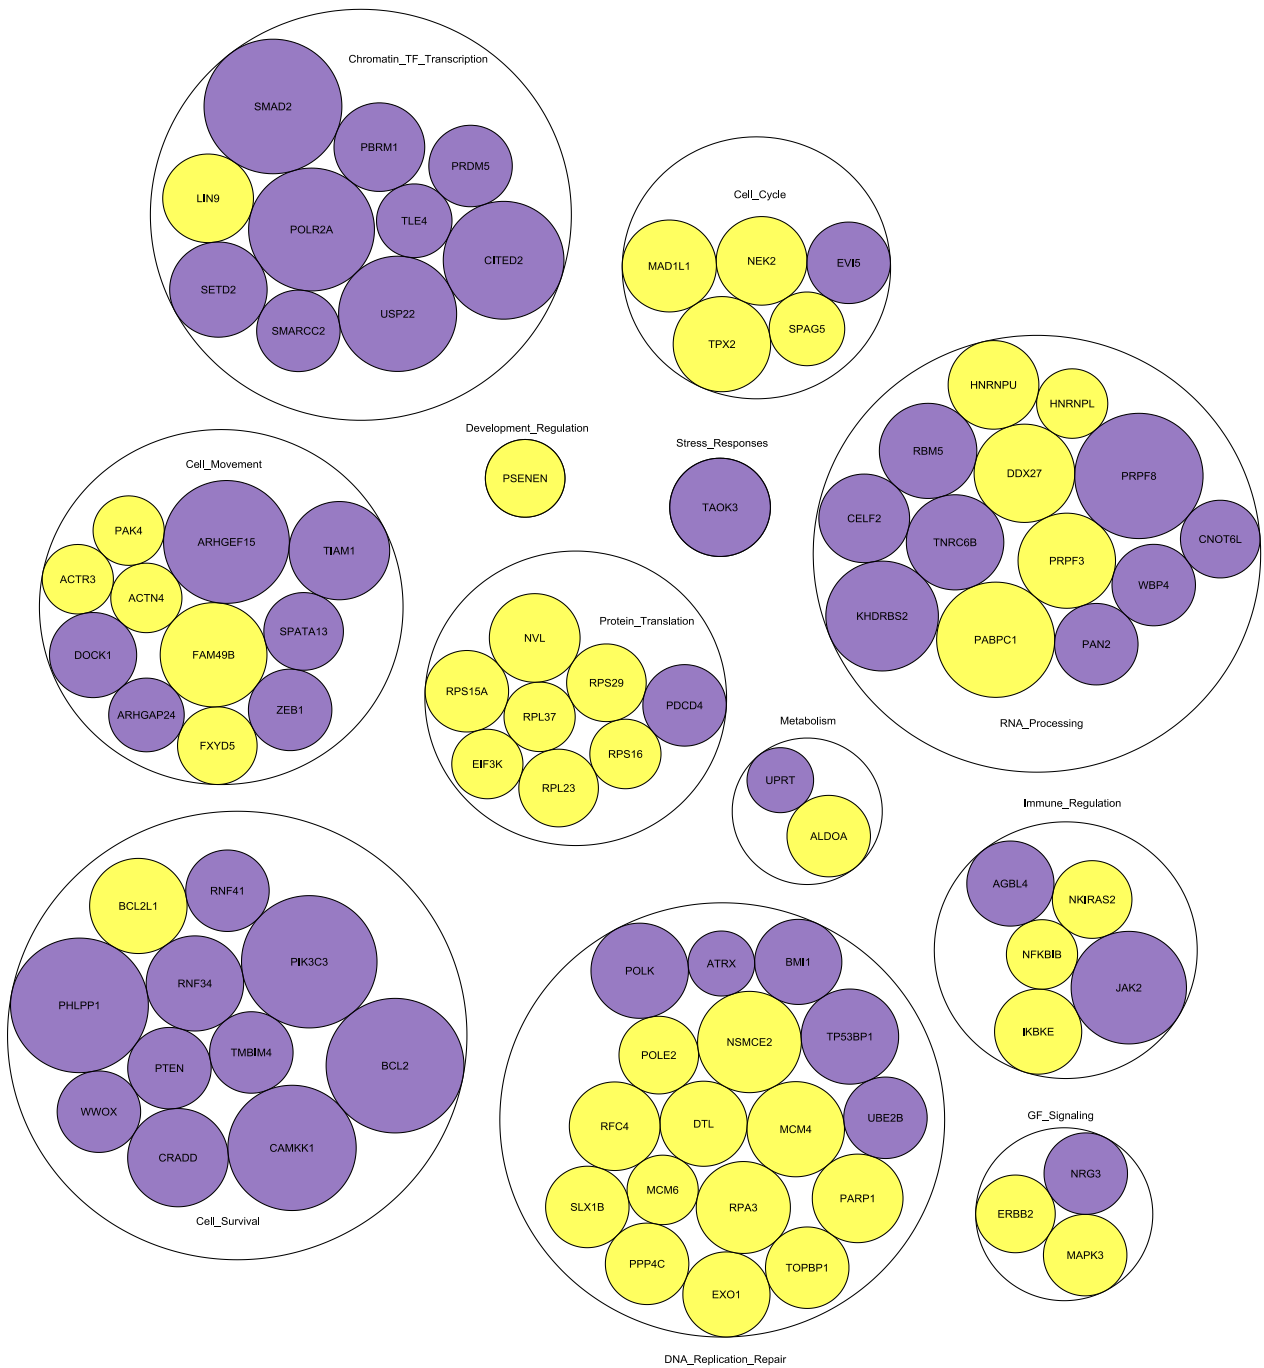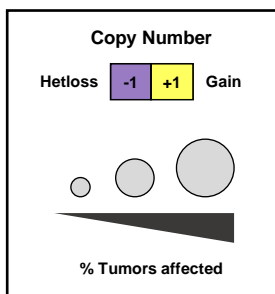

# UCEC

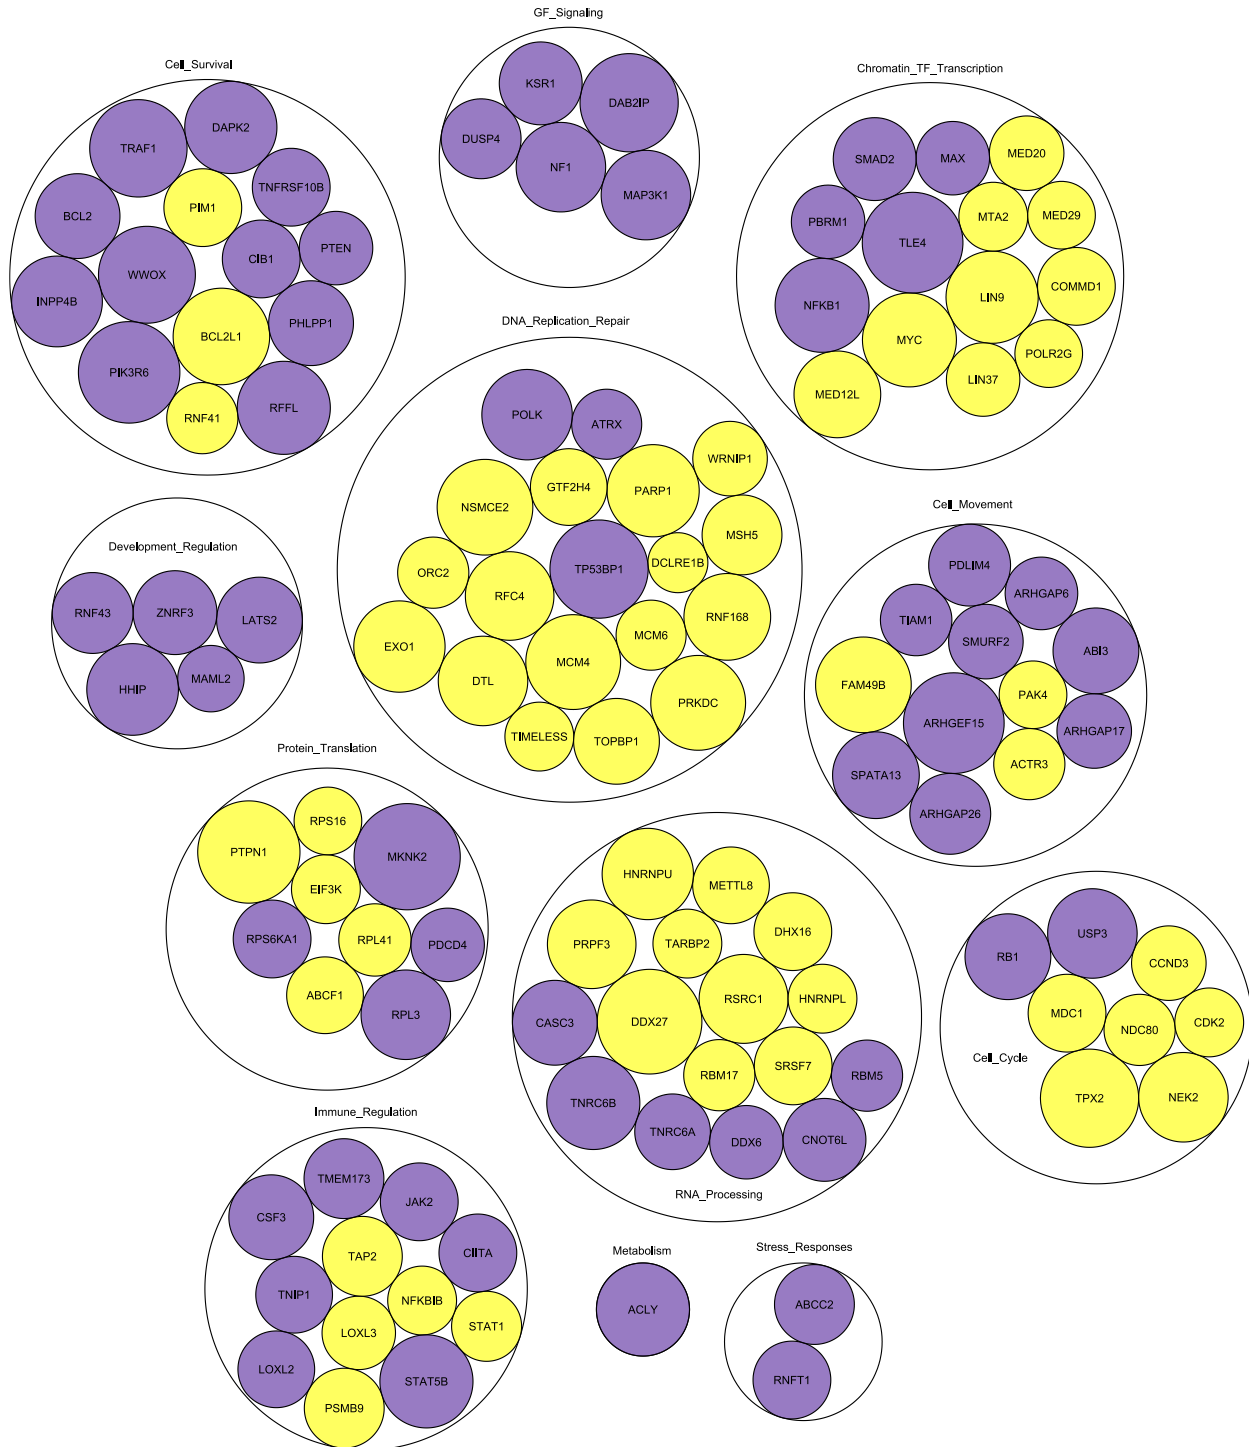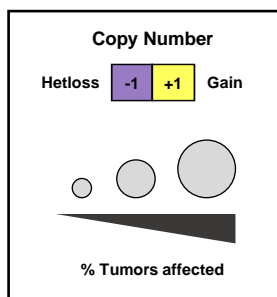

# SARC

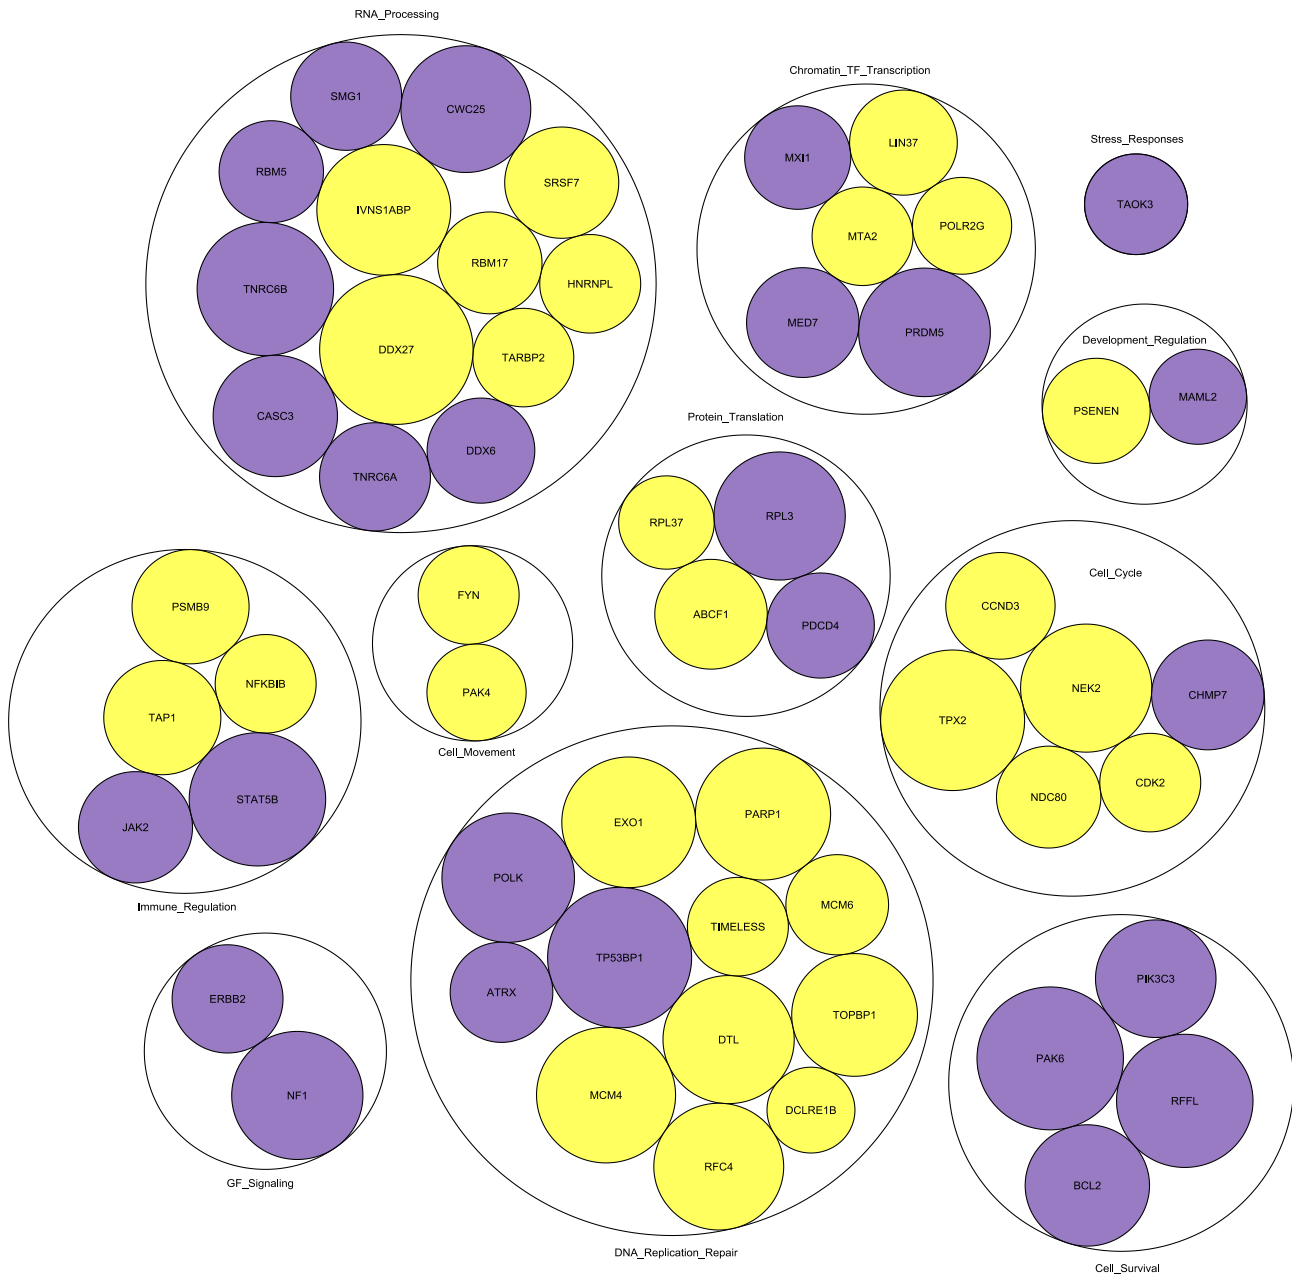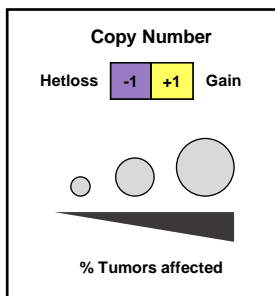



**LUAD**

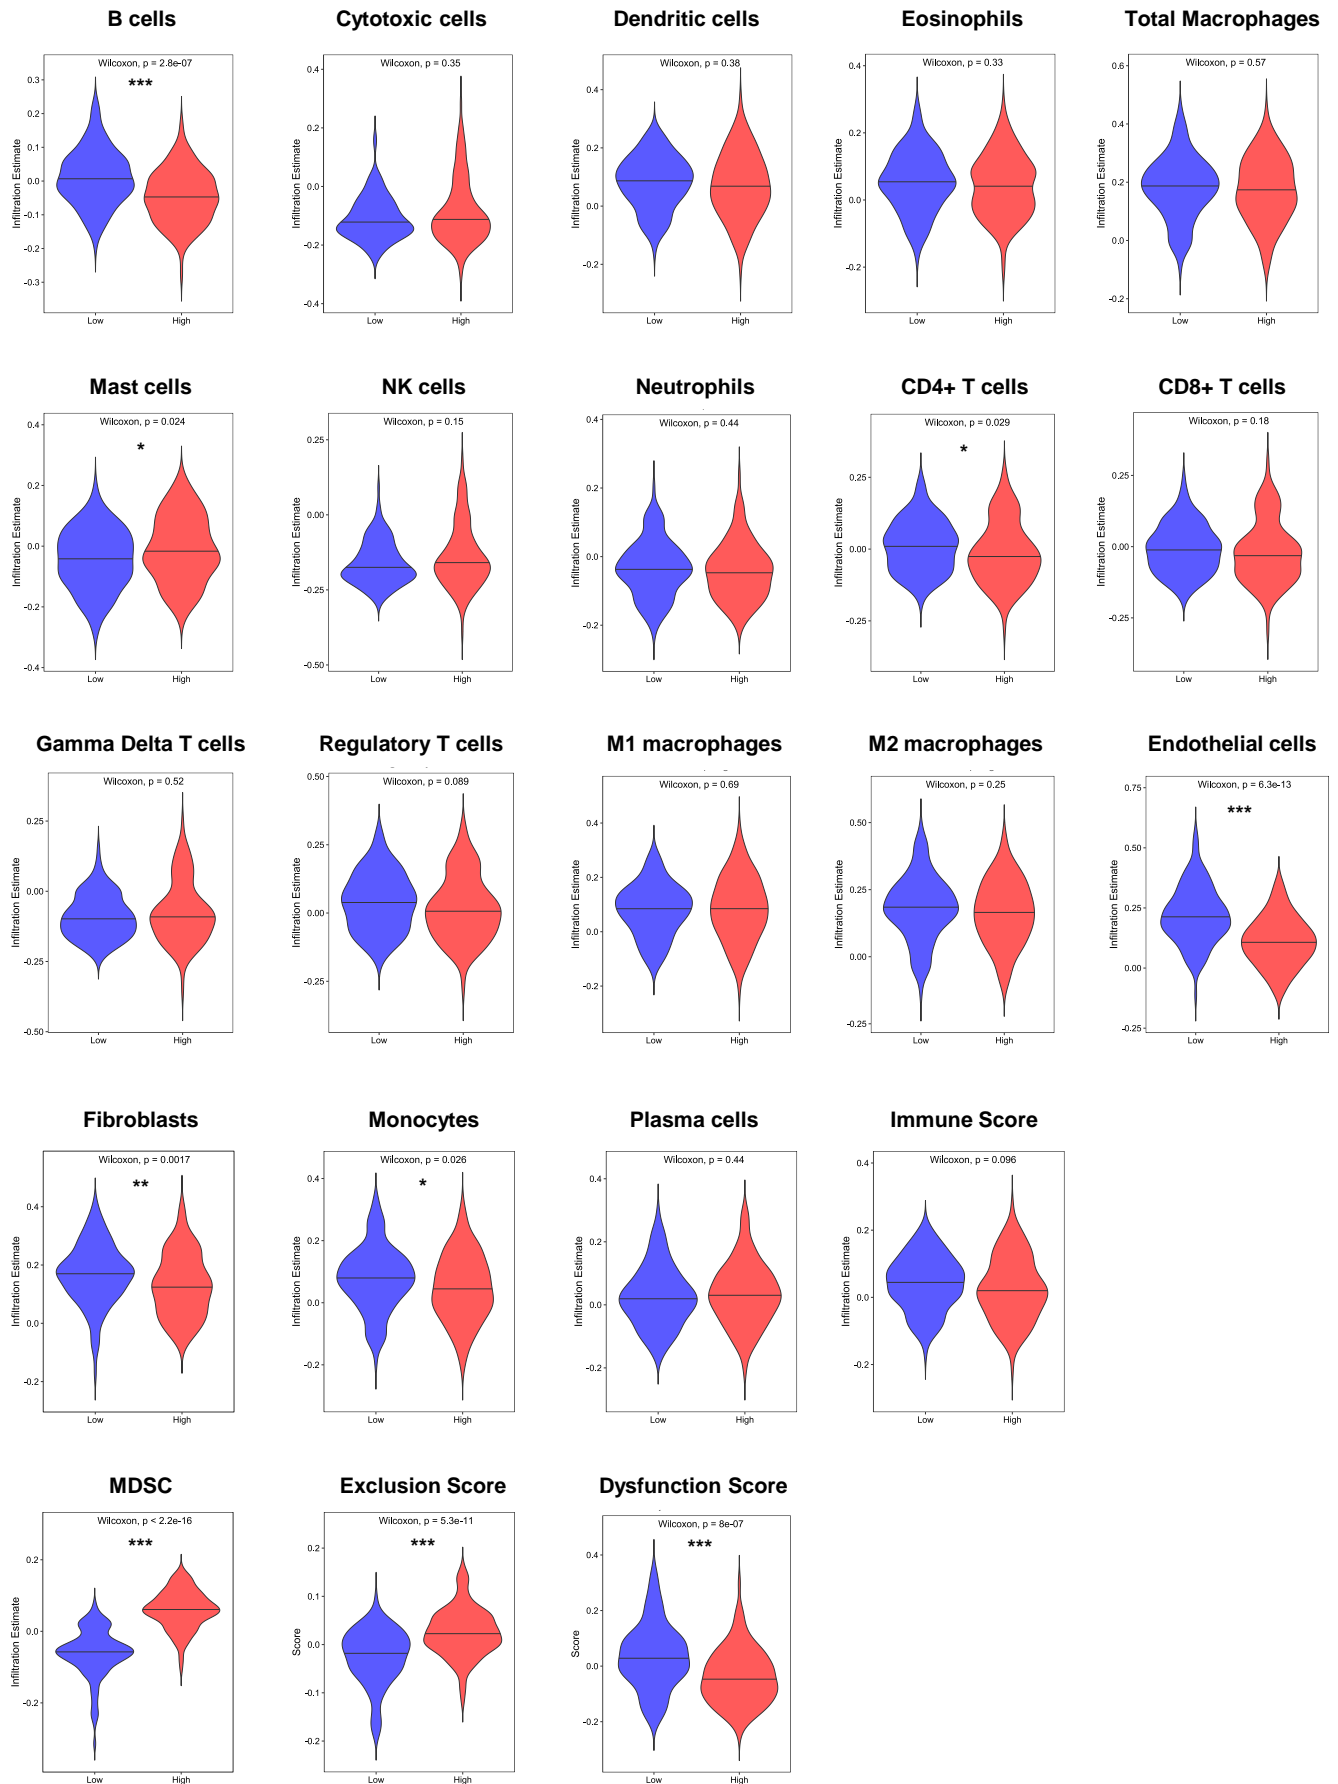

**IDH<sup>MUT</sup> LGG**

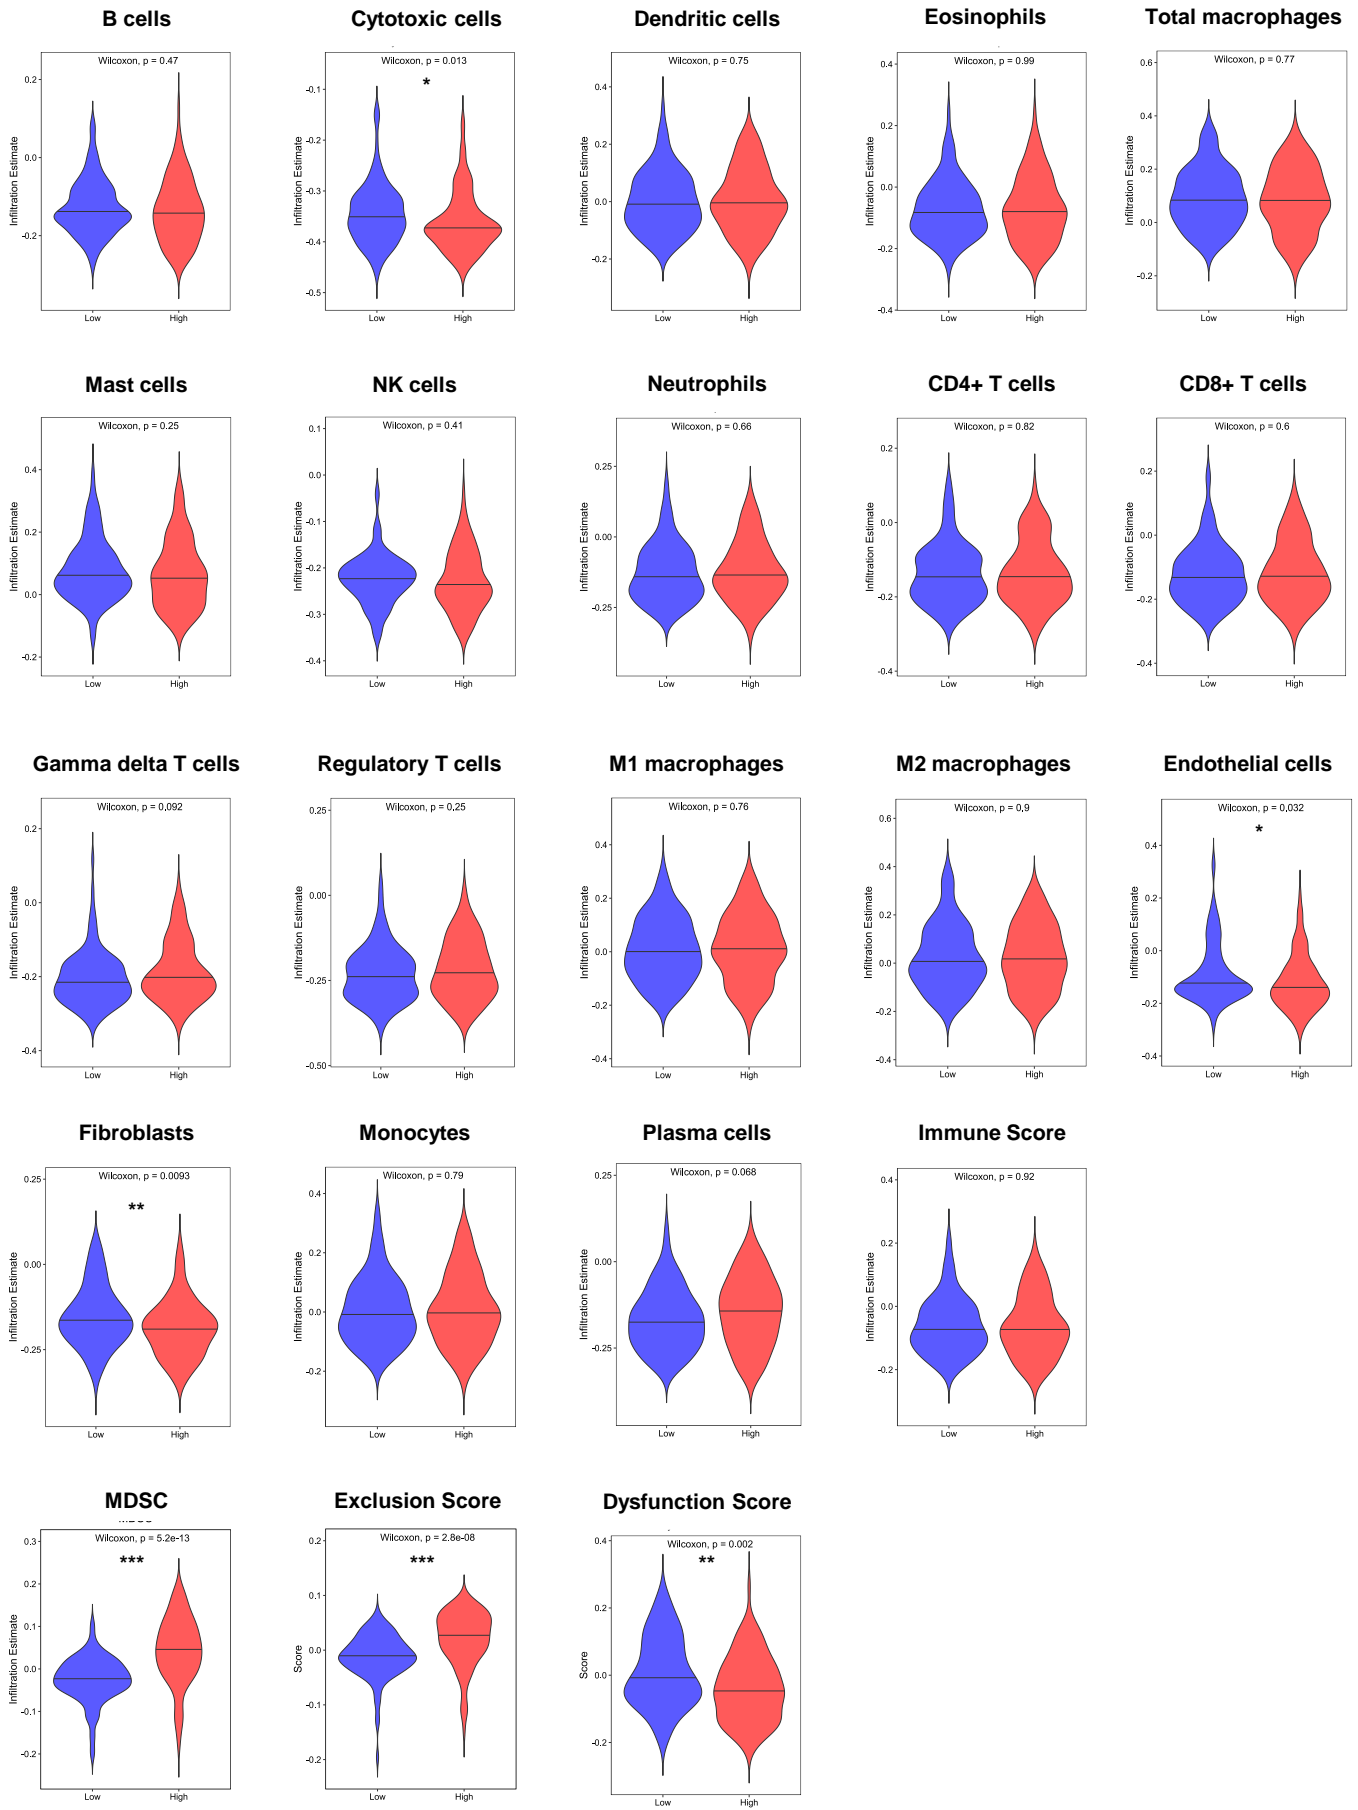

**PAAD**

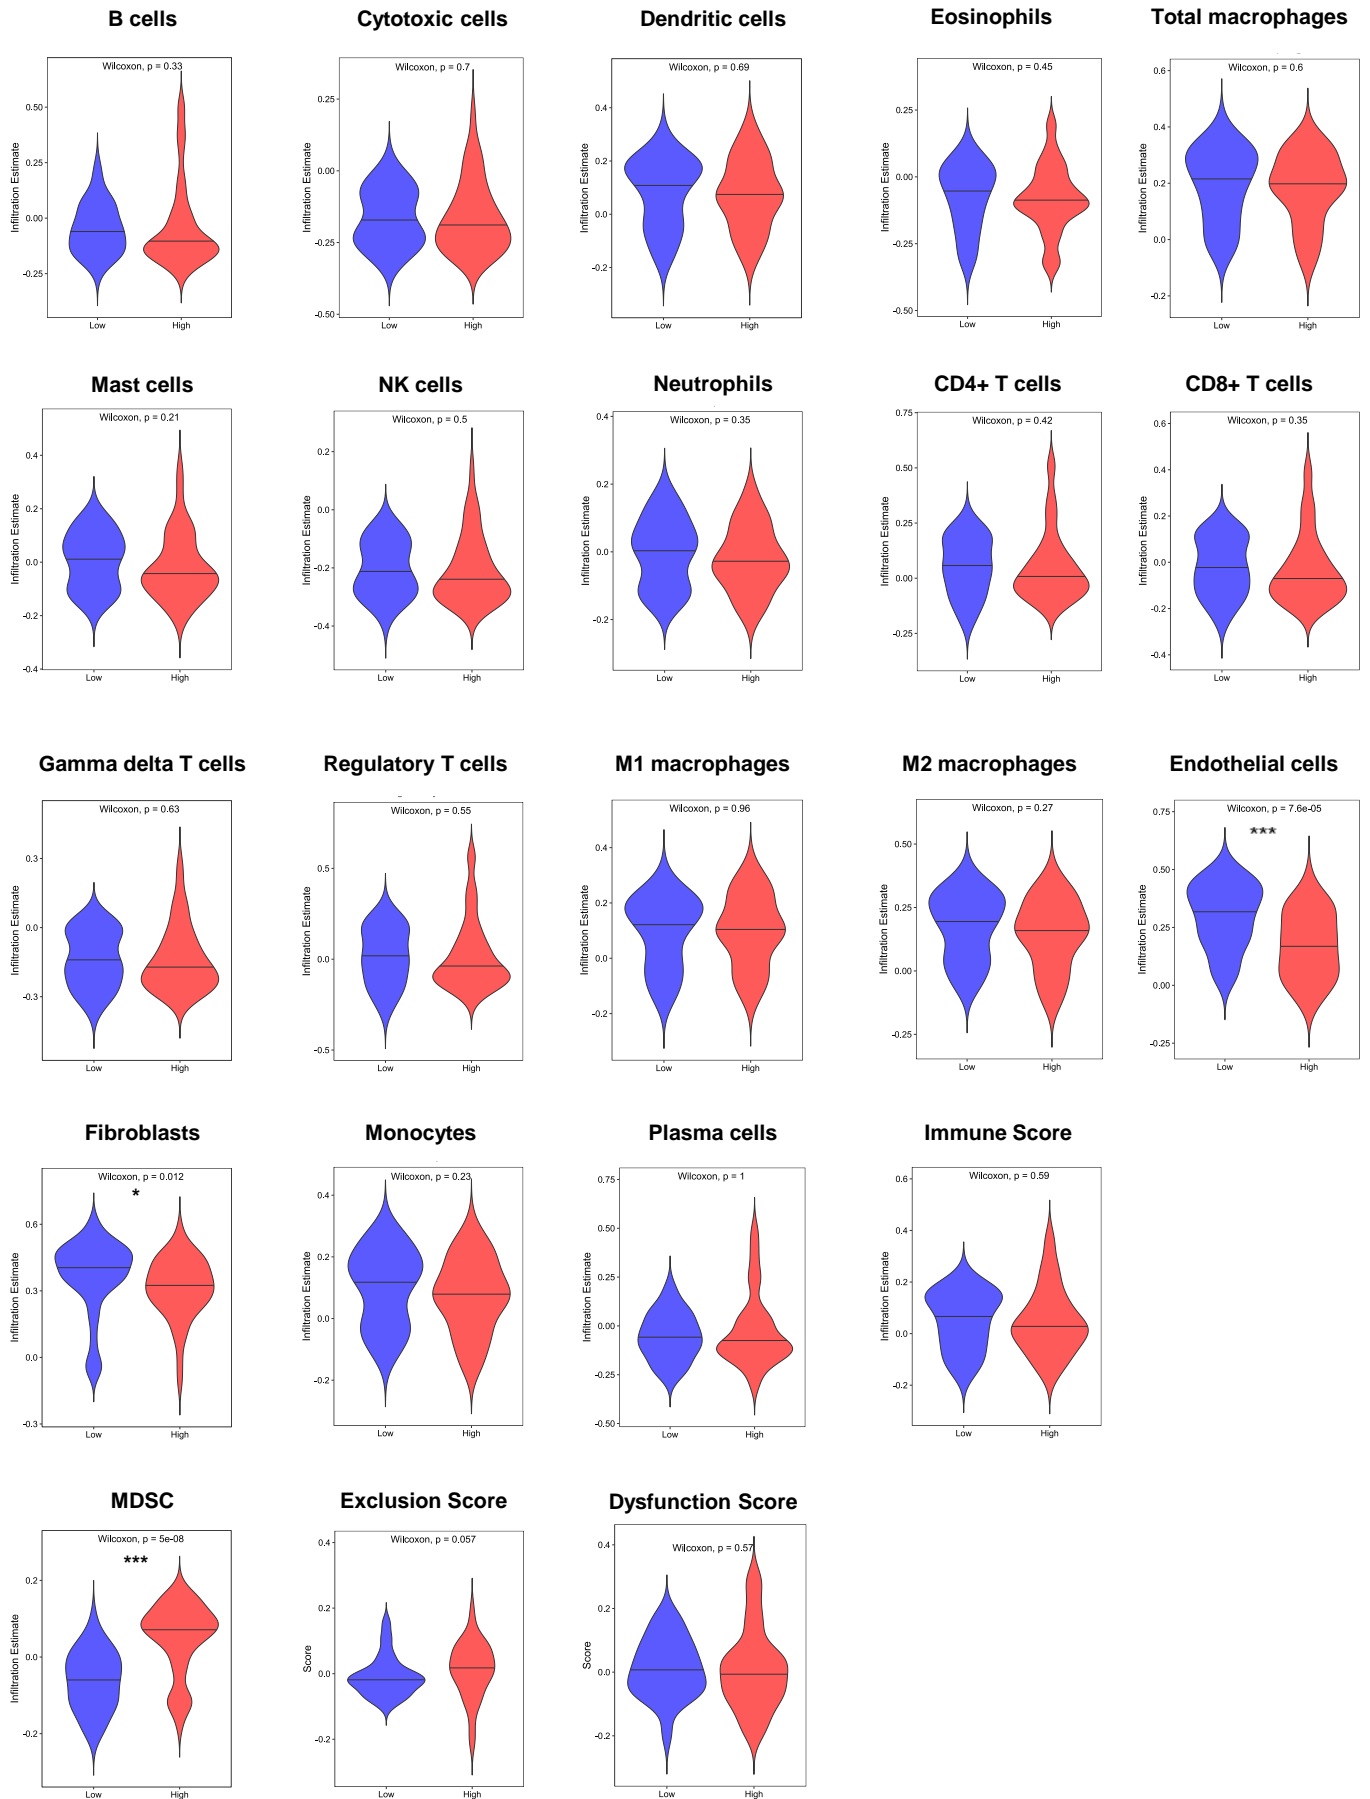

**UCEC**

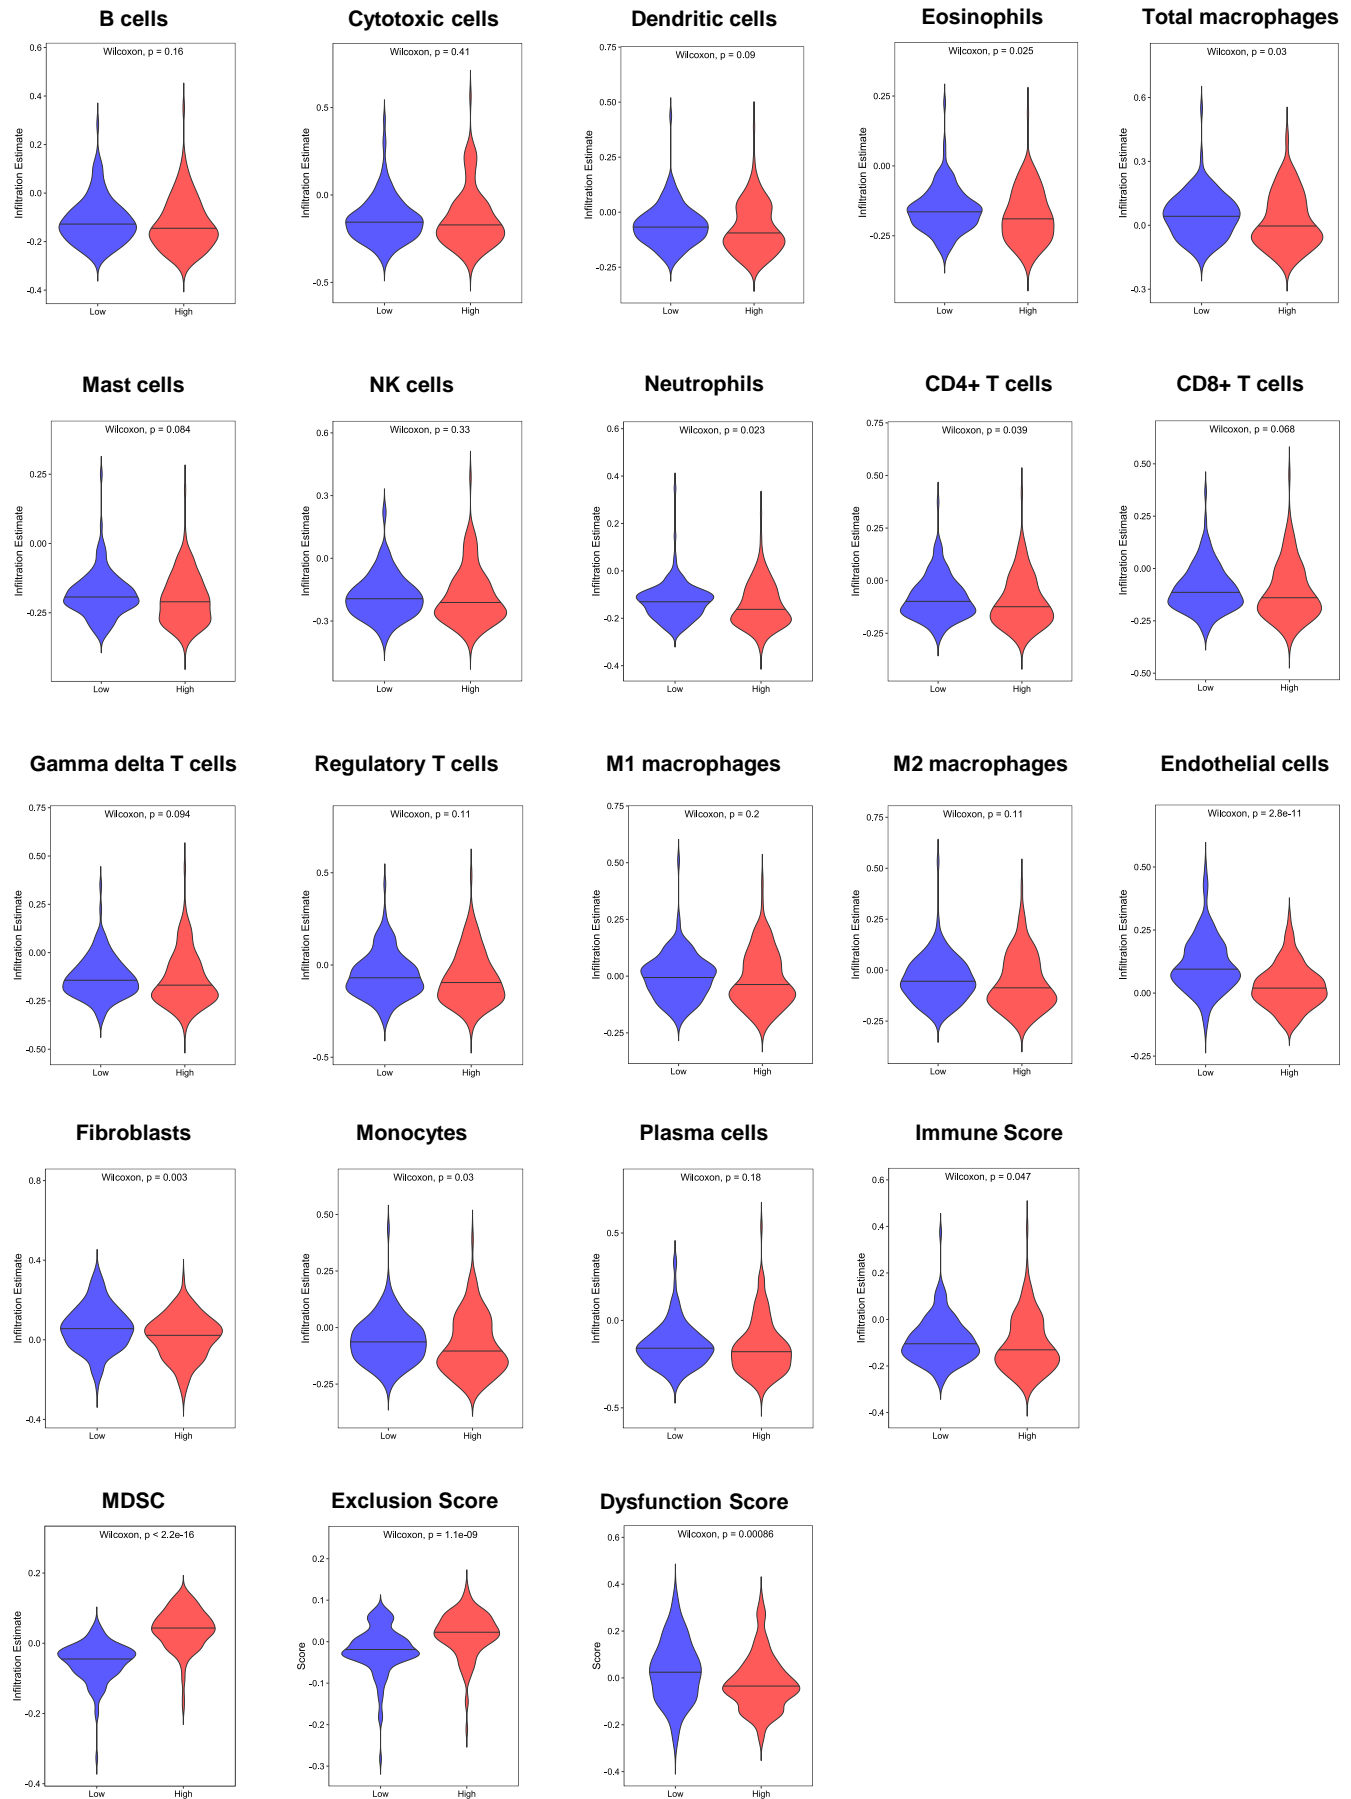

**SARC**

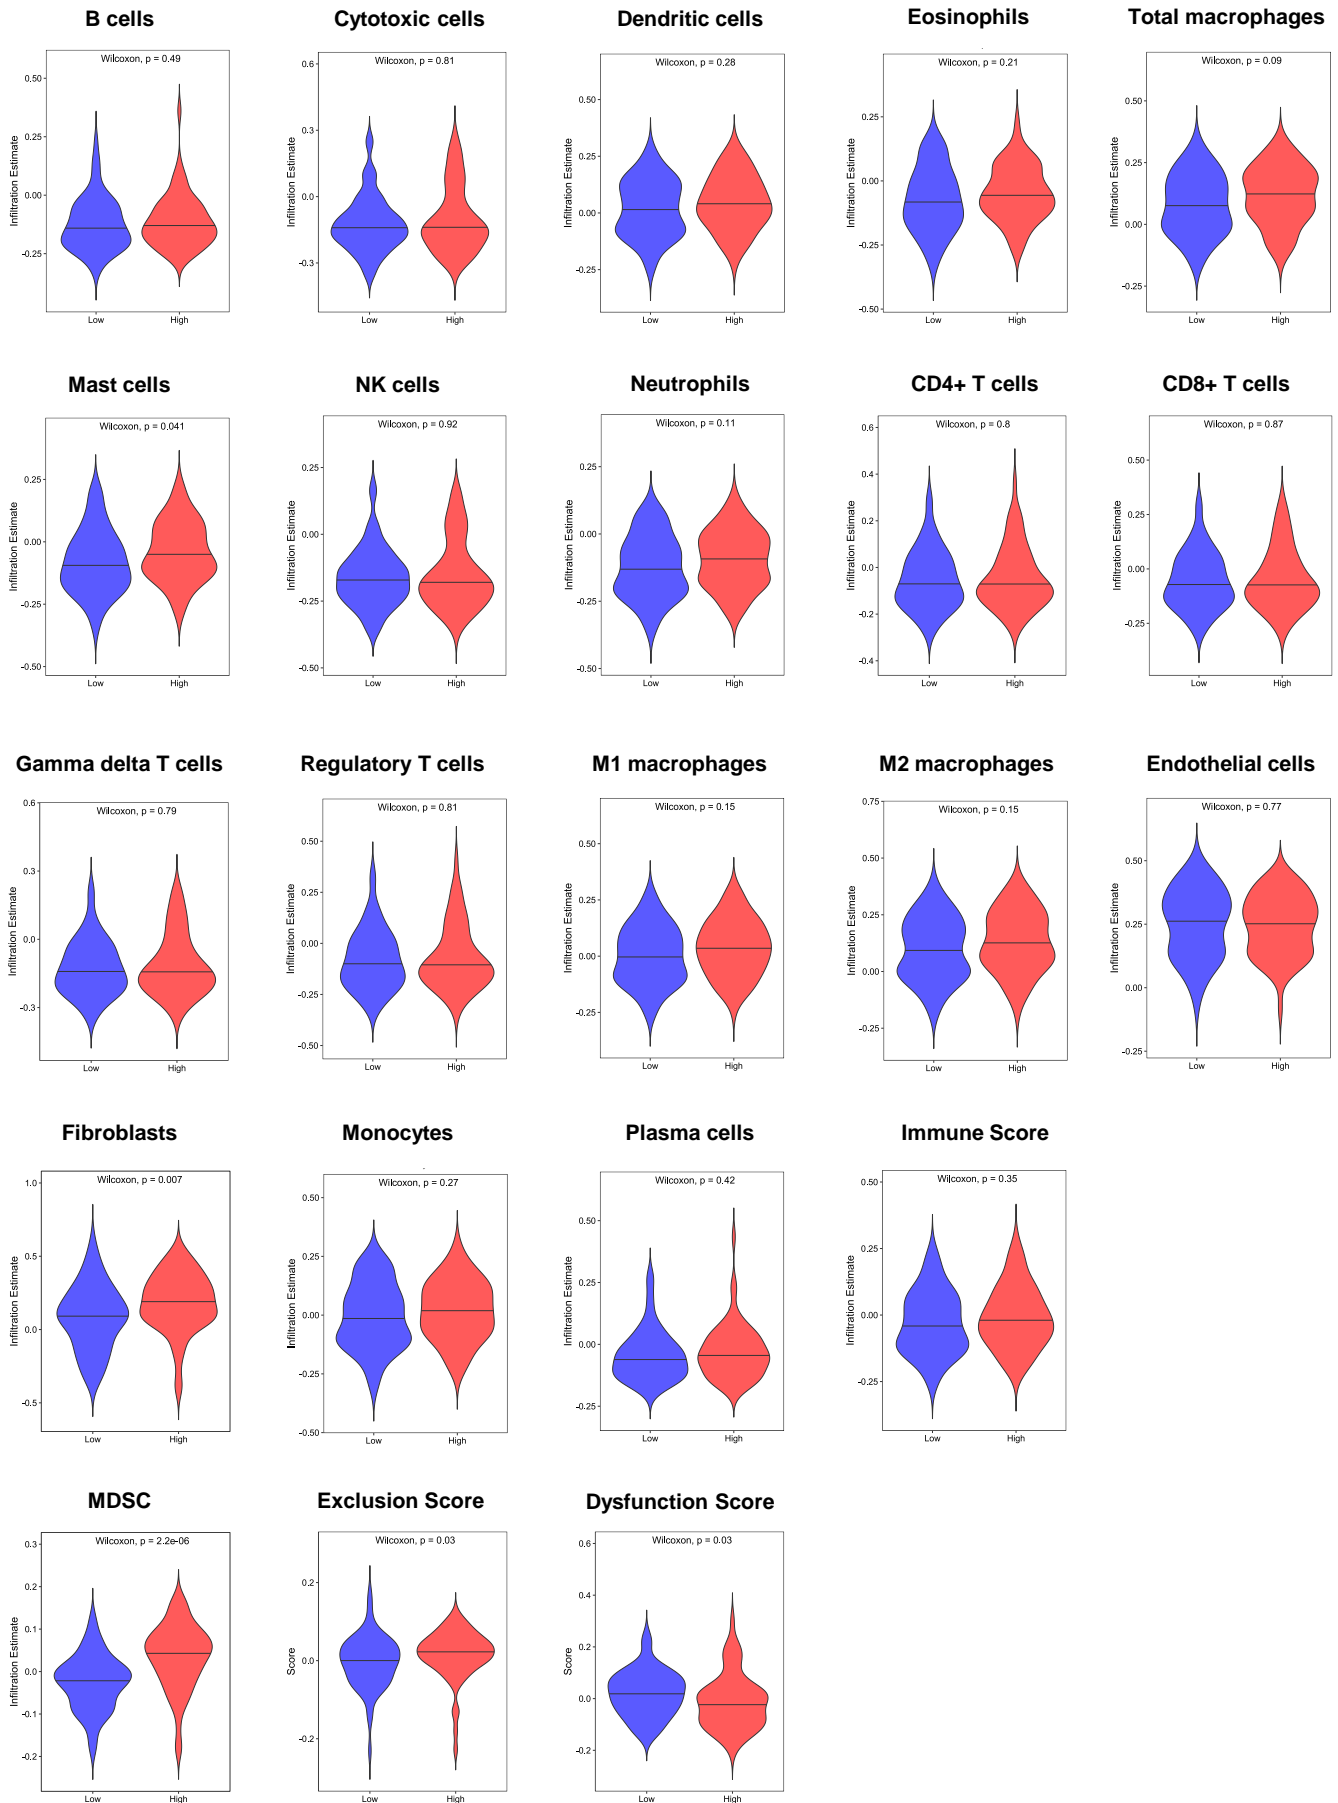

## LUAD

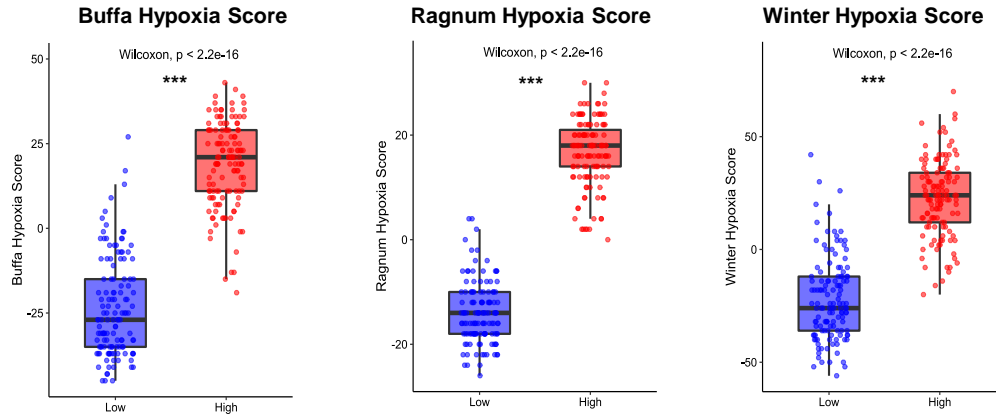

## IDH<sup>MUT</sup> LGG

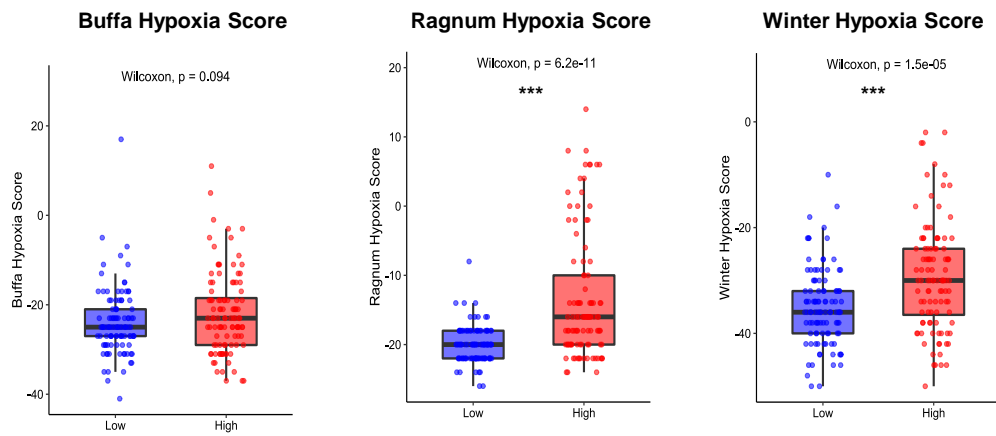

## PAAD

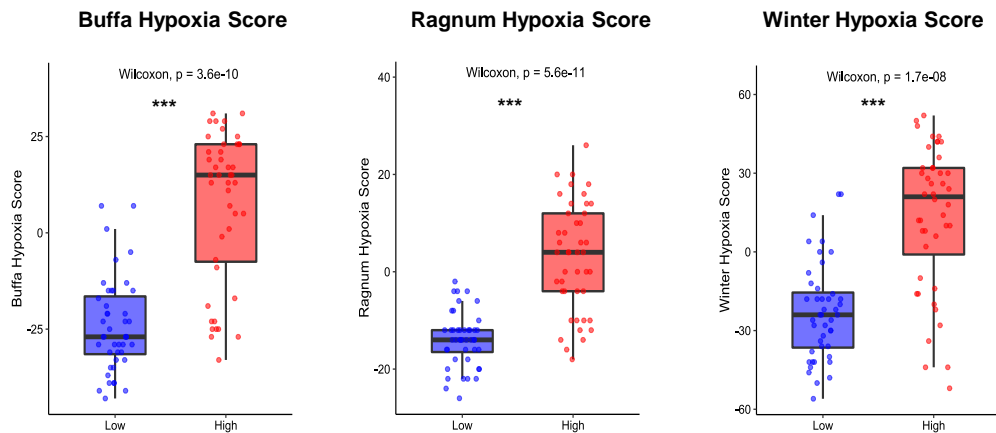

### UCEC

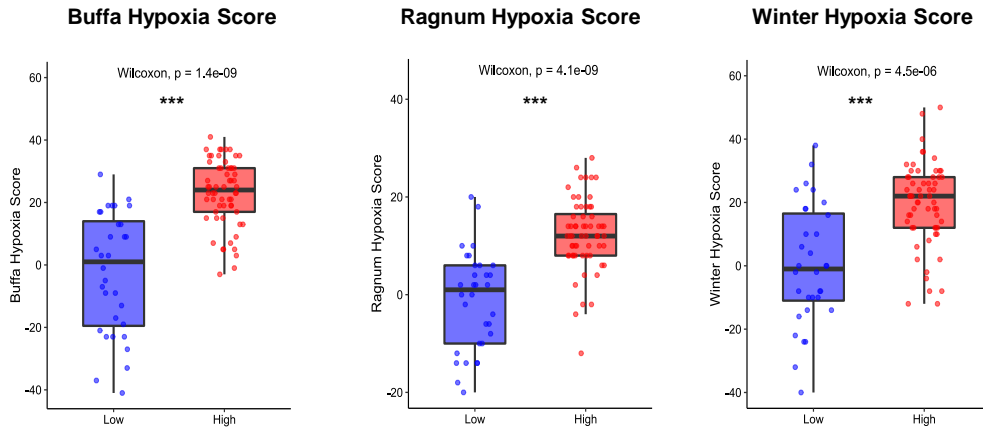

### SARC

Buffa Hypoxia Score      Ragnum Hypoxia Score      Winter Hypoxia Score

Hypoxia scores not available for SARC patients

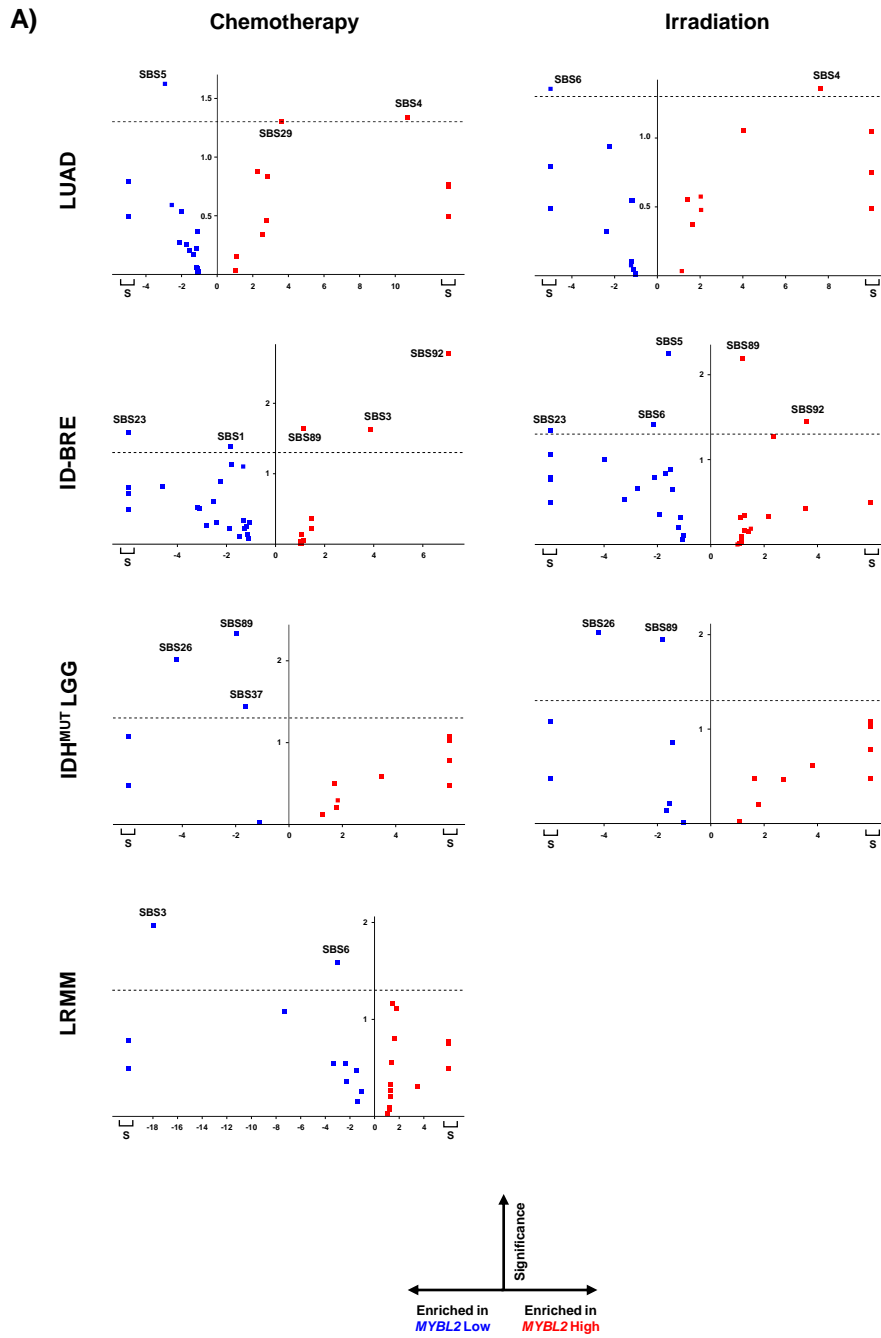



Chemotherapy Treated Tumors

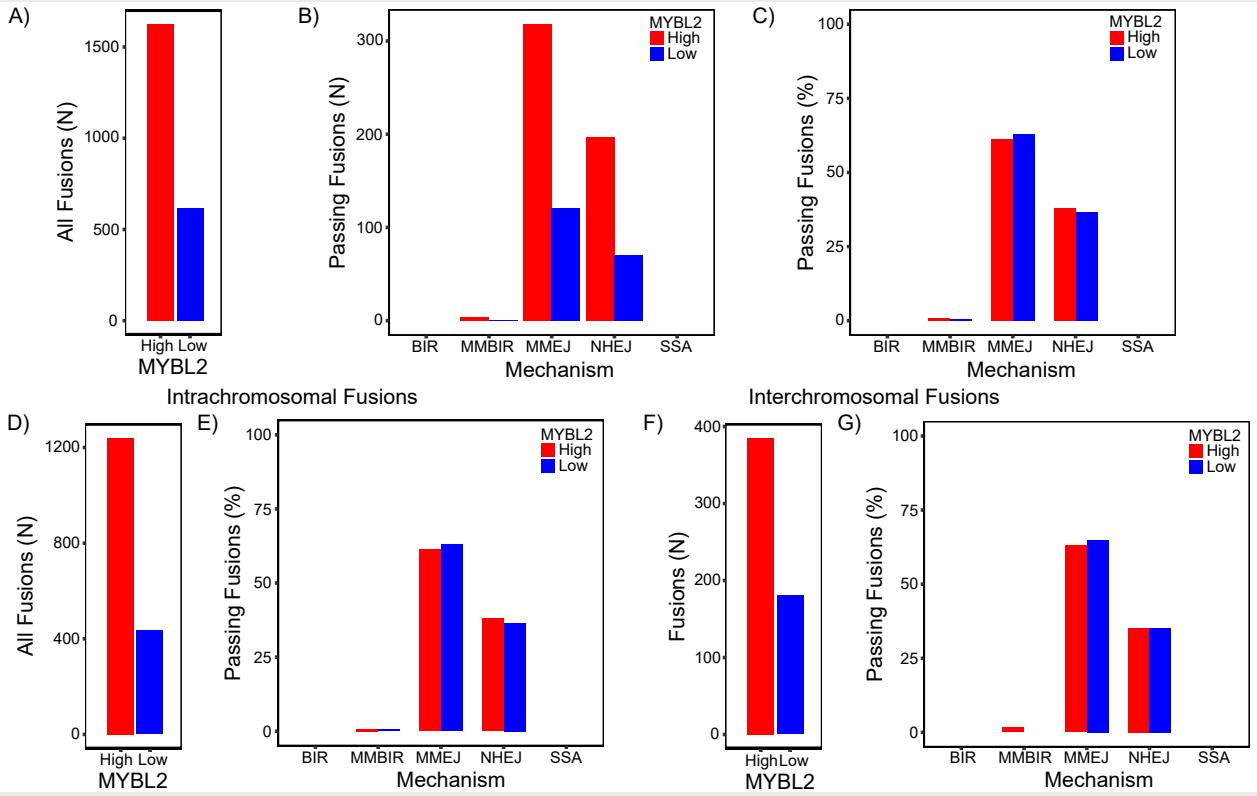

Irradiation Treated Tumors

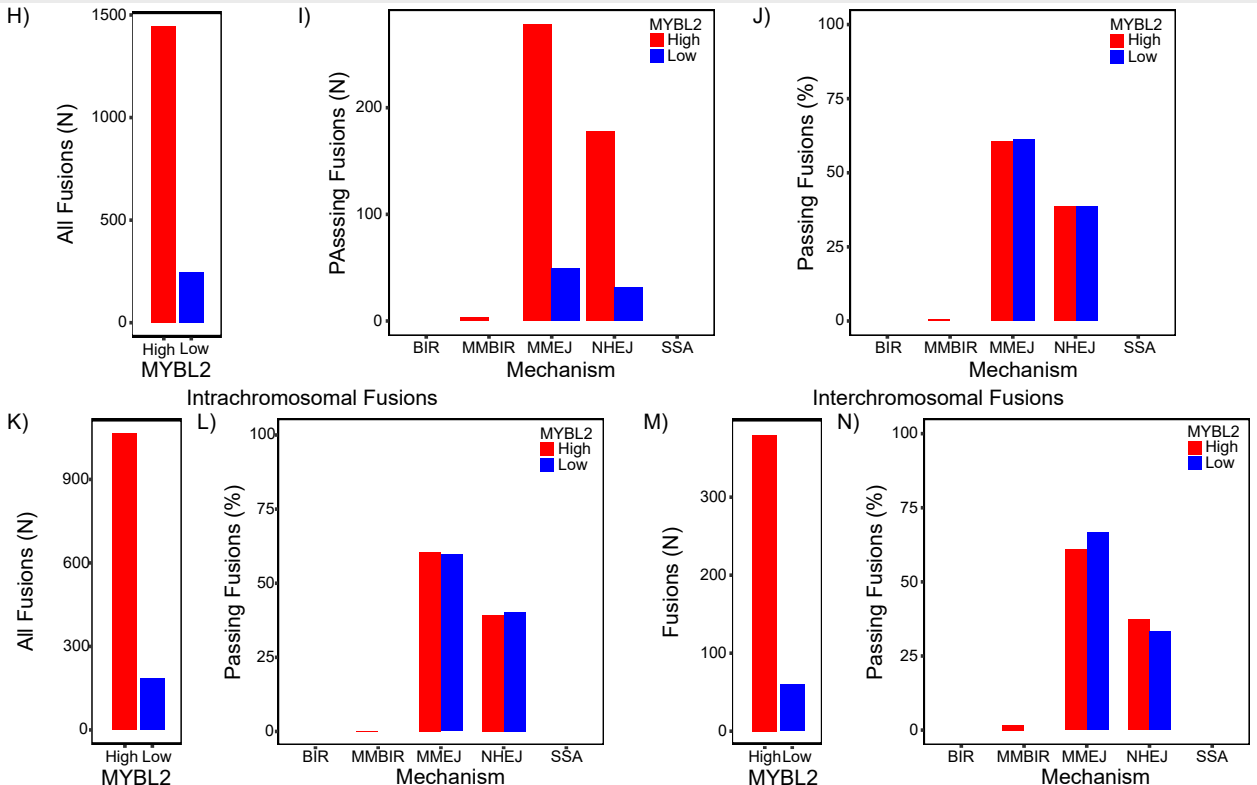

Chemotherapy Treated Tumors

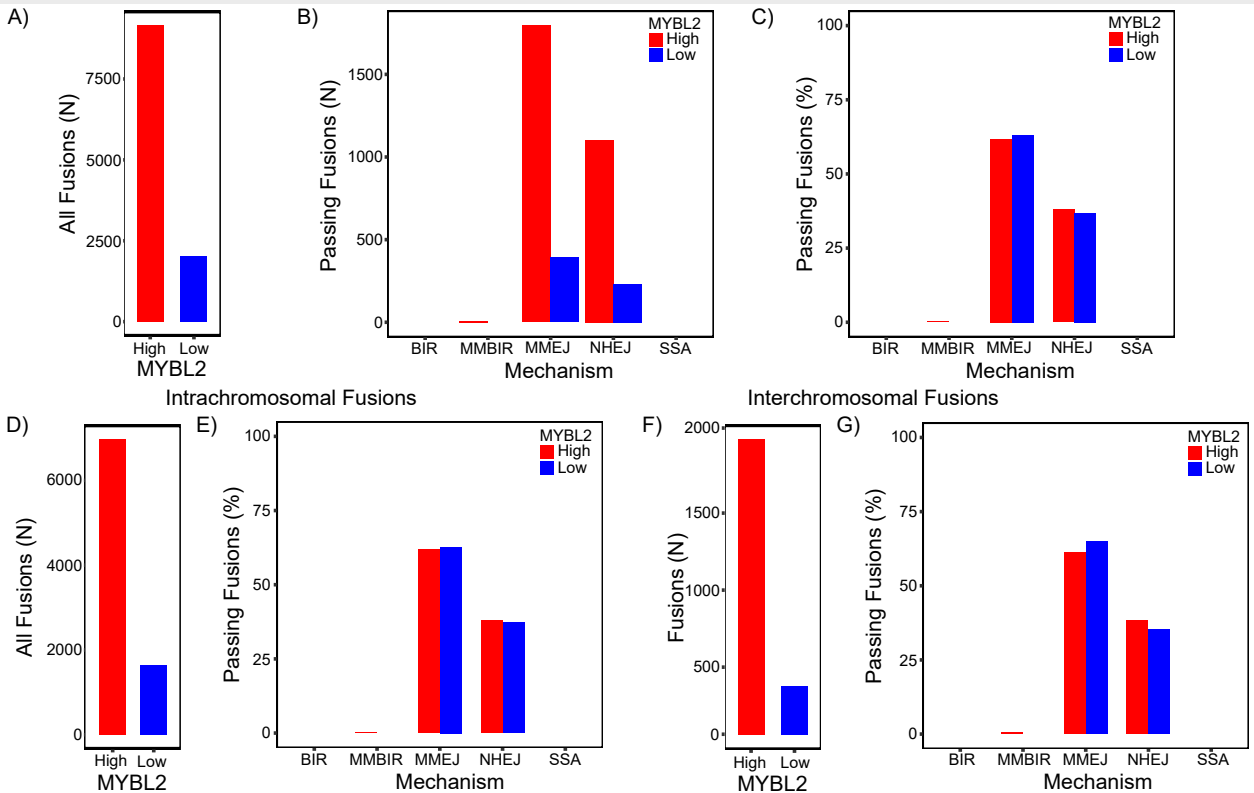

Irradiation Treated Tumors

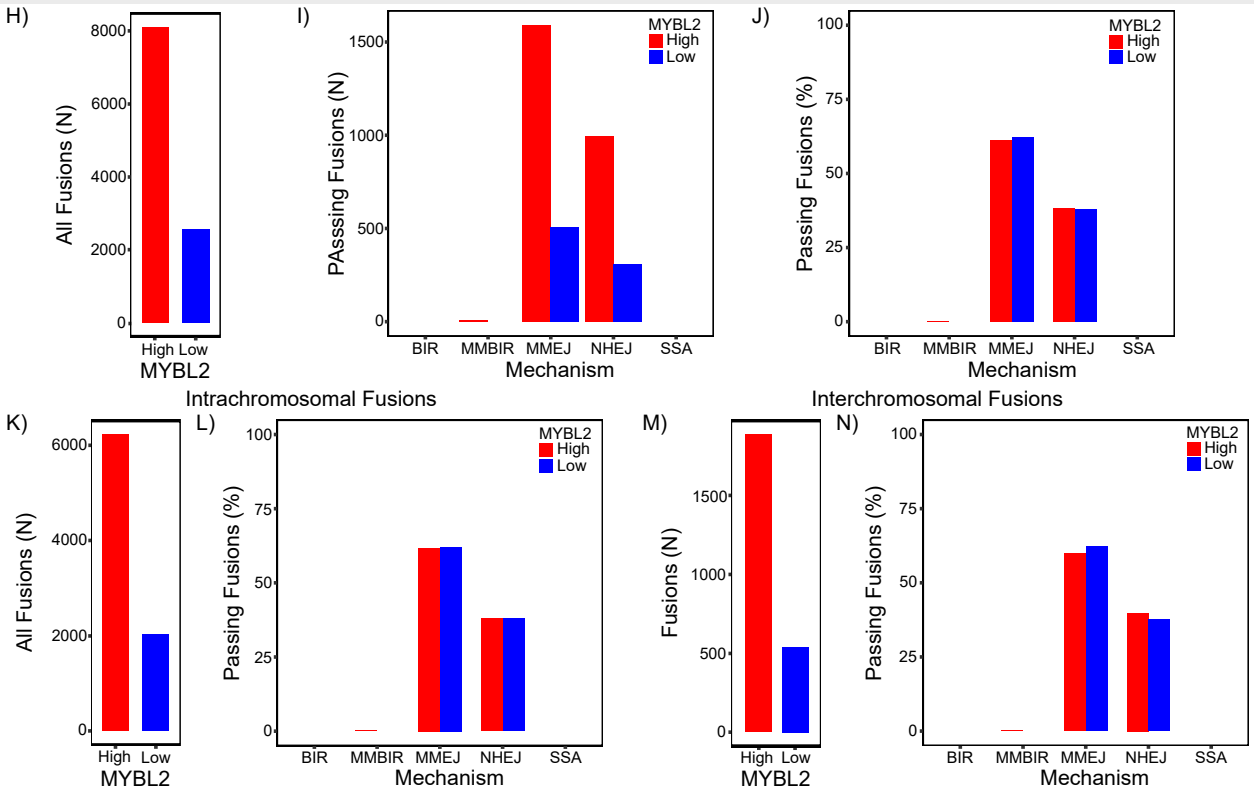

Chemotherapy Treated Tumors

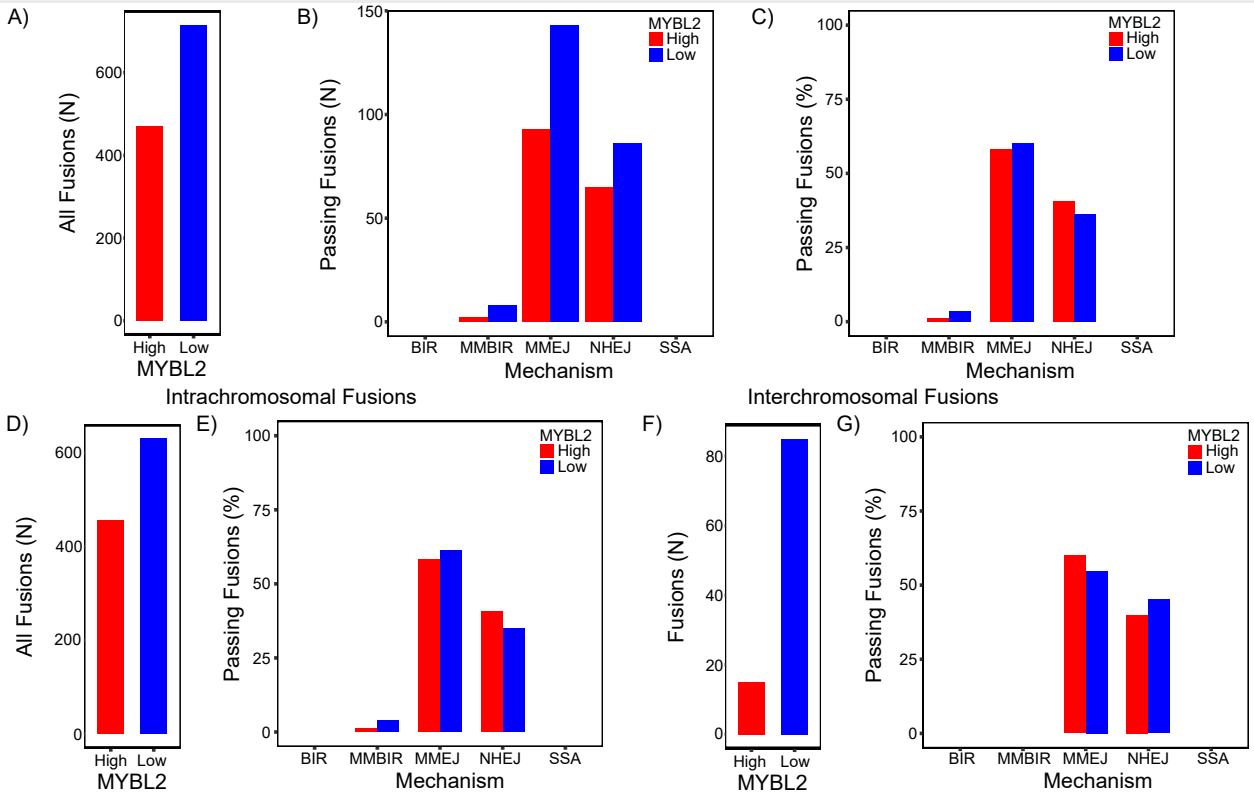

Irradiation Treated Tumors

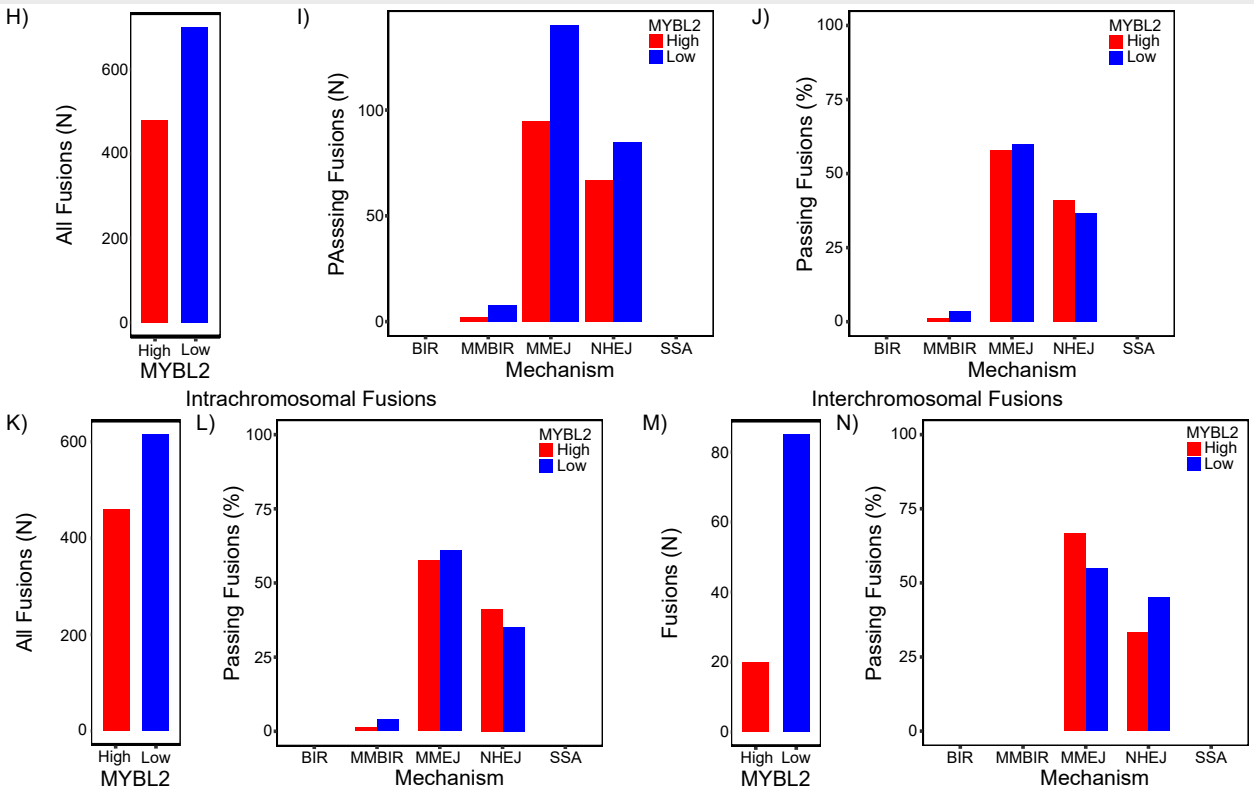

Chemotherapy Treated Tumors

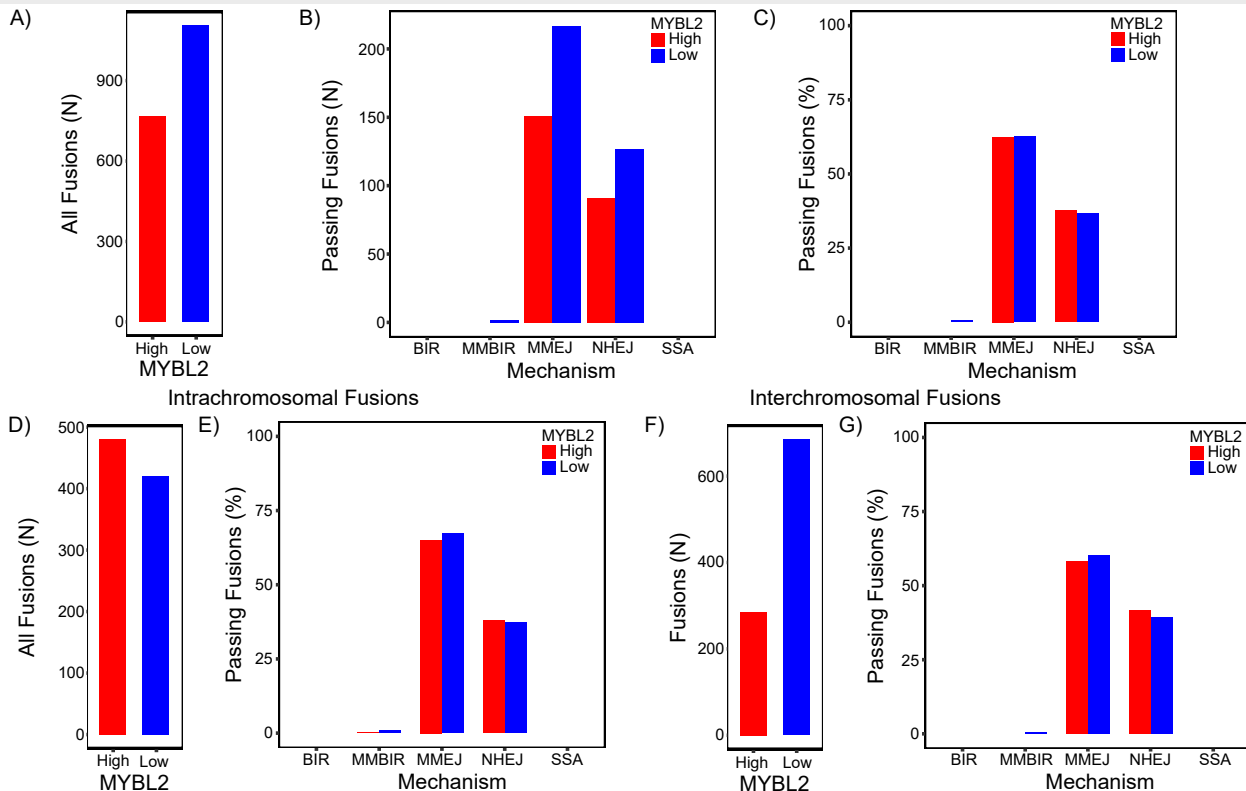

ORIEN LUAD

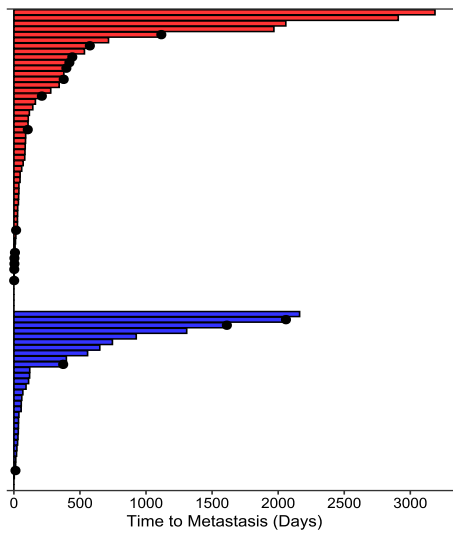

ORIEN ID-BRE

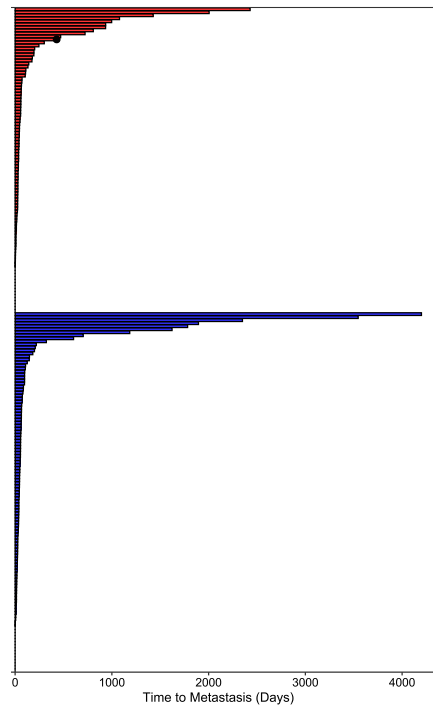

Source: https://www.biorxiv.org/content/10.1101/2022.05.06.490945v1.full.pdf
